# Supplementary material for: An efficient approach to AviCys analogues via regio- and stereoselective hydrosulfuration of ynamides
Source: Royal Society of Chemistry journal article supplement (doi:10.1039/d4qo01572j), 2024-01-01
Supplement: d4qo01572j1.pdf [file d4qo01572j1.pdf]

## Supporting Information

### An Efficient Approach to AviCys Analogues via Regio- and Stereoselective Hydrosulfuration of Ynamides

Zhenjia Zhang<sup>a†</sup>, Zhe Ding<sup>b†</sup>, Jinhua Yang<sup>c\*</sup>, Yongli Zhao<sup>b</sup>, Zhenguang Zhao<sup>d</sup>, Can Liu<sup>a</sup>, Norman Metanis<sup>d\*</sup> & Junfeng Zhao<sup>a\*</sup>

<sup>a</sup>*Affiliated Cancer Hospital, Guangdong Provincial Key Laboratory of Major Obstetric Diseases, School of Pharmaceutical Sciences, Guangzhou Medical University, Guangzhou 511436, Guangdong, P. R. China.*

<sup>b</sup>*National Research Center for Carbohydrate Synthesis, College of Chemistry and Chemical Engineering, Jiangxi Normal University, Nanchang 330022, Jiangxi, P. R. China*

<sup>c</sup>*Hubei Key Laboratory of Pollutant Analysis & Reuse Technology, College of Chemistry and Chemical Engineering, Hubei Normal University, Huangshi 435002, P. R. China*

<sup>d</sup>*Institute of Chemistry, The Hebrew University of Jerusalem, Jerusalem 9190401, Israel.*

|                                                                           |           |
|---------------------------------------------------------------------------|-----------|
| <b>1. General remarks.....</b>                                            | <b>2</b>  |
| <b>2. General procedure for the preparation of starting ynamides.....</b> | <b>3</b>  |
| <b>3. General experimental procedure .....</b>                            | <b>5</b>  |
| <b>4. Characterization of products.....</b>                               | <b>5</b>  |
| <b>5. 2-D NMR analysis of 6i.....</b>                                     | <b>29</b> |
| <b>6. X-ray structure for compound 6i, and 6l.....</b>                    | <b>30</b> |
| <b>7. Copies of <sup>1</sup>H NMR, <sup>13</sup>C NMR spectrum.....</b>   | <b>31</b> |
| <b>8. References.....</b>                                                 | <b>94</b> |

## 1. General remarks:

All reactions were carried out in oven-dried glassware. All the reactions were monitored by thin-layer chromatography (TLC); All reagents and solvents were obtained from commercial sources. Starting material thiol compounds **2** were purchased from commercial sources. Starting material ynamides were synthesized according literature. Products purification was done using silica gel column chromatography.  $^1\text{H}/^{13}\text{C}$  NMR, in  $\text{CDCl}_3$  unless otherwise stated, using either TMS or the undeuterated solvent residual signal as the reference.  $^1\text{H}$  NMR spectra were recorded in  $\text{CDCl}_3$  and referenced to residual  $\text{CHCl}_3$  at 7.26 ppm, and  $^{13}\text{C}$  NMR spectra were referenced to the central peak of  $\text{CDCl}_3$  at 77.0 ppm. Data for  $^1\text{H}$  NMR are reported in terms of chemical shift ( $\delta$ ), integration, multiplicity (s = singlet, d = doublet, t = triplet, q = quartet, m = multiplet), broad peaks (br), coupling constants (Hz), and assignment. Data for  $^{13}\text{C}$  NMR are reported in terms of chemical shift, multiplicity (s = singlet, d = doublet, t = triplet, q = quartet, m = multiplet), and coupling constants (Hz), and no special nomenclature is used for equivalent carbons. High-resolution mass spectra (HRMS) were obtained by the electrospray ionization time-of-flight (ESI-TOF) mass spectrometry. Flash column chromatography purification of compounds was carried out by gradient elution using ethyl acetate (EA) in light petroleum ether (PE).

## 2. General procedure for the preparation of starting ynamides

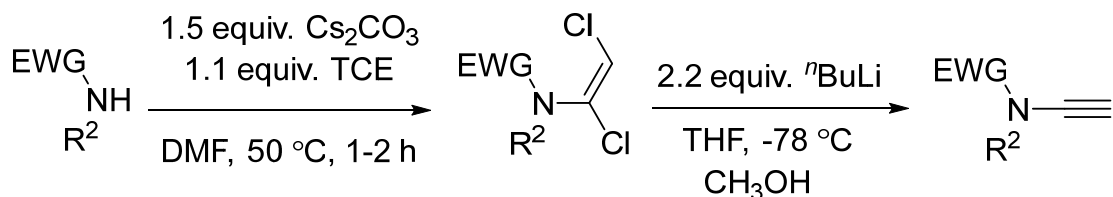

### General procedure A <sup>1</sup>

#### 2.1: General procedure for the Cs<sub>2</sub>CO<sub>3</sub> promoted synthesis of 1,2-dichloroenamides.

To a stirring suspension of amide (1.0 equiv.), Cs<sub>2</sub>CO<sub>3</sub> (1.5 equiv.) and DMF (0.75 mL/mmol of amide substrate), at 50 °C, was added trichloroethylene (1.1 equiv.) dropwise over 10 minutes. The resulting mixture was stirred at 50 °C until reaction completion, as analysed by TLC (1-2 h). Upon cooling to room temperature, the mixture was partitioned between EtOAc and H<sub>2</sub>O (roughly 2:1 of EtOAc:H<sub>2</sub>O), the organic layer was separated and further washed with water (×3). The organic layer was then dried (Na<sub>2</sub>SO<sub>4</sub>), filtered and concentrated in vacuo. Purification was then performed as described for each compound. Note: The use of an inert atmosphere or rigorously dried solvent is not necessary for this transformation.

#### 2.2: General procedure for the synthesis of ynamides using *n*-butyllithium.

To an oven-dried, argon flushed flask was added 1,2-dichloroenamide (1.0 equiv.) and anhydrous THF (4 mL/mmol of enamide substrate), and cooled to -78 °C whilst stirring. A solution of *n*-butyllithium (2.5 M solution in hexanes, 1.2 equiv.) was then added dropwise over 10 minutes, such that the reaction does not exceed -70 °C, and the resulting mixture was then stirred at -78 °C for 5 minutes, followed by warming to -41 °C for 30 minutes. Upon cooling to -78 °C, another portion of *n*-butyllithium (2.5 M solution in hexanes, 1.0 equiv.) was added dropwise over 10 minutes, and stirred for a further 10 minutes. Next, the electrophile (1.2 equiv.) was added at -78 °C and the stirring mixture was allowed to warm to room temperature. Upon reaction completion, as analysed by TLC (~ 1 h), the reaction mixture was quenched with water, followed by extraction with Et<sub>2</sub>O (×2). The organic extracts were combined and dried (Na<sub>2</sub>SO<sub>4</sub>), filtered and concentrated in vacuo. Purification was then performed as described for each compound.

### General procedure B <sup>2</sup>

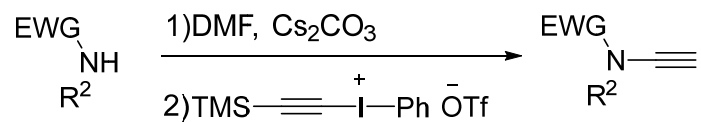

Cs<sub>2</sub>CO<sub>3</sub> (1.5 equiv.) was added to a solution of amide (1.0 equiv.) in absolute toluene under argon at 0 °C. Stirred for a further 2 hours. After the mixture was allowed to warm to room temperature, iodonium salt **2** (1.1 equiv.) was added in small portions. The reaction mixture was stirred for 12 h and then filtered through a plug of silica gel. Purification by column chromatography.

### General procedure C <sup>3</sup>

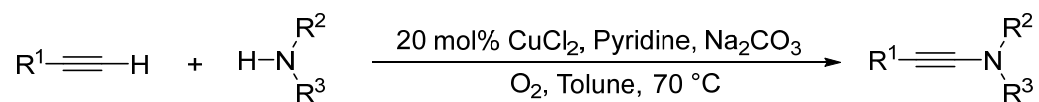

Adding acetylene substrate (1.0 equiv.), CuCl<sub>2</sub> (0.2 equiv.), pyridine(2.0 equiv.), Na<sub>2</sub>CO<sub>3</sub>(2.0 equiv.), and toluene in turn into a schlenk flask, adding an atmospheric pressure of oxygen, using a peristaltic pump to add the amide (5.0 equiv.). TLC monitoring the reaction, after the reaction, removing the toluene. Purifying the products by chromatographic column.

### 3. General experimental procedure:

To an oven-dried Schlenk tube equipped with a magnetic stir bar was added ynamides (0.2 mmol), Cs<sub>2</sub>CO<sub>3</sub> (1.5 equiv.), thiols or thiophenols (0.4 mmol) in *i*-propanol (1.0 mL). The solution was heated at 35 °C and monitored by TLC. Upon the reaction completion, the residue was purified by silica gel chromatography to afford the desired products.

### 4. Characterization of products:

#### (Z)-N-(2-(tert-butylthio)vinyl)-N,4-dimethylbenzenesulfonamide (3a)

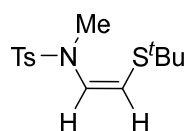

White solid, (57.4 mg, yield 96%);  $R_f = 0.2$  (PE/EA = 10:1); <sup>1</sup>H NMR (400 MHz, CDCl<sub>3</sub>)  $\delta$  7.69 (d,  $J = 8.2$  Hz, 2H), 7.31 (d,  $J = 8.0$  Hz, 2H), 6.28 (d,  $J = 8.0$  Hz, 1H), 5.73 (d,  $J = 8.0$  Hz, 1H), 3.08 (s, 3H), 2.42 (s, 3H), 1.31 (s, 9H); <sup>13</sup>C NMR (100 MHz, CDCl<sub>3</sub>)  $\delta$  143.7, 134.9, 129.7, 127.4, 126.2, 113.8, 44.4, 36.0, 30.7, 21.6. HRMS (ESI)  $m/z$  calcd. for C<sub>14</sub>H<sub>22</sub>NO<sub>2</sub>S<sub>2</sub><sup>+</sup> [M + H]<sup>+</sup>: 300.1086, found: 300.1096.

#### (Z)-N-(2-(cyclohexylthio)vinyl)-N,4-dimethylbenzenesulfonamide (3b)

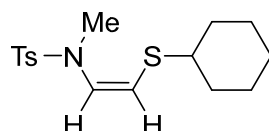

White solid, (60.5 mg, yield 93%);  $R_f = 0.2$  (PE/EA = 10:1); <sup>1</sup>H NMR (400 MHz, CDCl<sub>3</sub>)  $\delta$  7.68 (d,  $J = 8.3$  Hz, 2H), 7.30 (d,  $J = 8.0$  Hz, 2H), 6.16 (d,  $J = 7.8$  Hz, 1H), 5.65 (d,  $J = 7.8$  Hz, 1H), 3.06 (s, 3H), 2.78 – 2.67 (m, 1H), 2.42 (s, 3H), 1.99 – 1.89 (m, 2H), 1.72 (dt,  $J = 6.8, 3.3$  Hz, 2H), 1.40 – 1.16 (m, 6H); <sup>13</sup>C NMR (100 MHz, CDCl<sub>3</sub>)  $\delta$  143.6, 134.9, 129.6, 127.4, 125.1, 116.8, 46.7, 35.7, 33.5, 25.9, 25.6, 21.6. HRMS (ESI)  $m/z$  calcd. for C<sub>16</sub>H<sub>23</sub>NNaO<sub>2</sub>S<sub>2</sub><sup>+</sup> [M + Na]<sup>+</sup>: 348.1062, found: 348.1073.

#### (Z)-N-(2-(hexylthio)vinyl)-N,4-dimethylbenzenesulfonamide (3c)

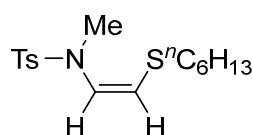

White solid, (61.5 mg, yield 94%);  $R_f = 0.2$  (PE/EA = 10:1); <sup>1</sup>H NMR (400 MHz, CDCl<sub>3</sub>)

$\delta$  7.69 (d,  $J = 8.2$  Hz, 2H), 7.30 (d,  $J = 8.0$  Hz, 2H), 6.13 (d,  $J = 7.7$  Hz, 1H), 5.58 (d,  $J = 7.7$  Hz, 1H), 3.06 (s, 3H), 2.60 (t,  $J = 7.4$  Hz, 2H), 2.42 (s, 3H), 1.56 (dt,  $J = 14.9, 7.3$  Hz, 2H), 1.31 (m, 8H), 0.87 (t,  $J = 6.8$  Hz, 3H);  $^{13}\text{C}$  NMR (100 MHz,  $\text{CDCl}_3$ )  $\delta$  143.7, 134.9, 129.7, 127.4, 124.8, 119.0, 35.6, 34.8, 31.3, 30.0, 28.1, 22.5, 21.5, 14.0. HRMS (ESI)  $m/z$  calcd. for  $\text{C}_{16}\text{H}_{25}\text{NNaO}_2\text{S}_2^+$  [ $\text{M} + \text{Na}$ ] $^+$ : 350.1219, found: 350.1229.

**(Z)-N-benzyl-N-(2-(tert-butylthio)vinyl)-4-methylbenzenesulfonamide (3d)**

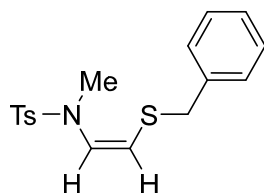

White solid, (57.9 mg, yield 87%);  $R_f = 0.2$  (PE/EA = 10:1);  $^1\text{H}$  NMR (400 MHz,  $\text{CDCl}_3$ )  $\delta$  7.65 (d,  $J = 8.3$  Hz, 2H), 7.32 – 7.22 (m, 7H), 6.16 (d,  $J = 7.8$  Hz, 1H), 5.53 (d,  $J = 7.8$  Hz, 1H), 3.80 (s, 2H), 3.00 (s, 3H), 2.41 (s, 3H).  $^{13}\text{C}$  NMR (100 MHz,  $\text{CDCl}_3$ )  $\delta$  143.7, 137.3, 134.7, 129.7, 128.8, 128.6, 127.3, 127.3, 125.8, 116.1, 38.7, 35.6, 21.5. HRMS (ESI)  $m/z$  calcd. for  $\text{C}_{17}\text{H}_{19}\text{NNaO}_2\text{S}_2^+$  [ $\text{M} + \text{Na}$ ] $^+$ : 356.0749, found: 356.0757.

**(Z)-N,N,4-dimethyl-N-(2-(phenylthio)vinyl)benzenesulfonamide (3e)**

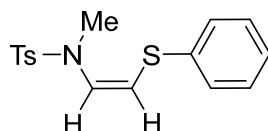

White solid, (59.9 mg, yield 94%);  $R_f = 0.2$  (PE/EA = 10:1);  $^1\text{H}$  NMR (400 MHz,  $\text{CDCl}_3$ )  $\delta$  7.72 (d,  $J = 8.2$  Hz, 2H), 7.33 (d,  $J = 8.0$  Hz, 2H), 7.29 (d,  $J = 4.3$  Hz, 4H), 7.22 (dq,  $J = 8.5, 4.3$  Hz, 1H), 6.45 (d,  $J = 7.8$  Hz, 1H), 5.79 (d,  $J = 7.8$  Hz, 1H), 3.16 (s, 3H), 2.44 (s, 3H);  $^{13}\text{C}$  NMR (100 MHz,  $\text{CDCl}_3$ )  $\delta$  144.0, 135.9, 134.8, 129.8, 129.1, 128.9, 128.2, 127.4, 126.7, 113.6, 35.8, 21.6. HRMS (ESI)  $m/z$  calcd. for  $\text{C}_{16}\text{H}_{18}\text{NO}_2\text{S}_2^+$  [ $\text{M} + \text{H}$ ] $^+$ : 320.0773, found: 320.0783.

**(Z)-N-(2-((4-bromophenyl)thio)vinyl)-N,4-dimethylbenzenesulfonamide (3f)**

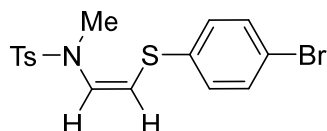

White solid, (72.0 mg, yield 91%);  $R_f = 0.2$  (PE/EA = 20:1);  $^1\text{H}$  NMR (400 MHz,  $\text{CDCl}_3$ )  $\delta$  7.70 (d,  $J = 8.1$  Hz, 2H), 7.38 (d,  $J = 8.3$  Hz, 2H), 7.33 (d,  $J = 8.0$  Hz, 2H), 7.13 (d,  $J = 8.3$  Hz, 2H), 6.49 (d,  $J = 7.8$  Hz, 1H), 5.70 (d,  $J = 7.8$  Hz, 1H), 3.13 (s, 3H), 2.43 (s,

3H);  $^{13}\text{C}$  NMR (100 MHz,  $\text{CDCl}_3$ )  $\delta$  144.1, 135.3, 134.5, 132.1, 130.1, 129.8, 129.3, 127.3, 120.4, 111.8, 35.8, 21.5. HRMS (ESI)  $m/z$  calcd. for  $\text{C}_{16}\text{H}_{16}\text{BrNNaO}_2\text{S}_2^+$  [ $\text{M} + \text{Na}$ ] $^+$ : 419.9698, found: 419.9703.

**(Z)-N,4-dimethyl-N-(2-(m-tolylthio)vinyl)benzenesulfonamide (3g)**

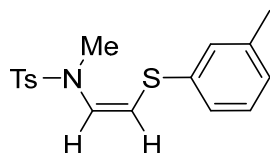

White solid, (63.9 mg, yield 96%);  $R_f$  = 0.2 (PE/EA = 20:1);  $^1\text{H}$  NMR (400 MHz,  $\text{CDCl}_3$ )  $\delta$  7.72 (d,  $J$  = 8.1 Hz, 2H), 7.32 (d,  $J$  = 7.9 Hz, 2H), 7.27 – 7.23 (m, 1H), 7.13 (m, 3H), 6.47 (d,  $J$  = 7.8 Hz, 1H), 5.66 (d,  $J$  = 7.8 Hz, 1H), 3.17 (s, 3H), 2.43 (s, 3H), 2.31 (s, 3H);  $^{13}\text{C}$  NMR (100 MHz,  $\text{CDCl}_3$ )  $\delta$  143.9, 137.6, 134.8, 134.7, 130.3, 129.8, 129.4, 128.3, 127.3, 126.9, 126.7, 113.7, 35.7, 21.5, 20.3. HRMS (ESI)  $m/z$  calcd. for  $\text{C}_{16}\text{H}_{16}\text{BrNNaO}_2\text{S}_2^+$  [ $\text{M} + \text{H}$ ] $^+$ : 334.0940, found: 334.0930.

**(Z)-N-(2-((2-aminophenyl)thio)vinyl)-N,4-dimethylbenzenesulfonamide (3h)**

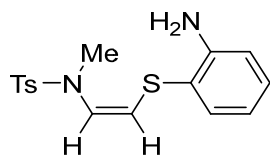

White solid, (60.1 mg, yield 90%);  $R_f$  = 0.2 (PE/EA = 10:1);  $^1\text{H}$  NMR (400 MHz,  $\text{CDCl}_3$ )  $\delta$  7.73 (d,  $J$  = 8.3 Hz, 2H), 7.33 (d,  $J$  = 8.0 Hz, 2H), 7.28 (m, 1H), 7.13 (m, 1H), 6.77 – 6.62 (m, 2H), 6.08 (d,  $J$  = 7.4 Hz, 1H), 5.67 (d,  $J$  = 7.4 Hz, 1H), 4.23 (s, 2H), 3.10 (s, 3H), 2.44 (s, 3H);  $^{13}\text{C}$  NMR (100 MHz,  $\text{CDCl}_3$ )  $\delta$  147.7, 143.9, 134.8, 134.4, 130.3, 129.7, 127.5, 125.9, 121.2, 118.5, 116.5, 115.3, 36.3, 21.5. HRMS (ESI)  $m/z$  calcd. for  $\text{C}_{16}\text{H}_{18}\text{N}_2\text{NaO}_2\text{S}_2^+$  [ $\text{M} + \text{Na}$ ] $^+$ : 357.0702, found: 357.0704.

**(Z)-N-(2-((4-methoxyphenyl)thio)vinyl)-N,4-dimethylbenzenesulfonamide (3i)**

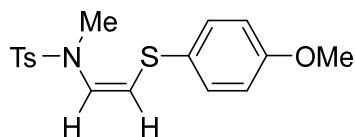

White solid, (66.3 mg, yield 95%);  $R_f$  = 0.2 (PE/EA = 20:1);  $^1\text{H}$  NMR (400 MHz,  $\text{CDCl}_3$ )  $\delta$  7.72 (d,  $J$  = 8.3 Hz, 2H), 7.35 – 7.30 (m, 2H), 7.29 – 7.23 (m, 2H), 6.83 (d,  $J$  = 8.8 Hz, 2H), 6.21 (d,  $J$  = 7.7 Hz, 1H), 5.77 (d,  $J$  = 7.6 Hz, 1H), 3.78 (s, 3H), 3.12 (s, 3H), 2.43 (s, 3H);  $^{13}\text{C}$  NMR (100 MHz,  $\text{CDCl}_3$ )  $\delta$  159.2, 143.8, 134.6, 132.1, 129.7, 127.3, 125.9, 125.8, 118.3, 114.8, 55.3, 35.9, 21.5. HRMS (ESI)  $m/z$  calcd. for

C<sub>17</sub>H<sub>19</sub>NNaO<sub>3</sub>S<sub>2</sub><sup>+</sup> [M + Na]<sup>+</sup>: 372.0699, found: 372.0710.

**(Z)-N-(2-(tert-butylthio)vinyl)-N-ethyl-4-methylbenzenesulfonamide (4a)**

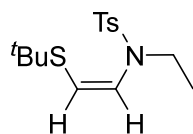

White solid, (57.0 mg, yield 91%);  $R_f$  = 0.2 (PE/EA = 20:1); <sup>1</sup>H NMR (400 MHz, CDCl<sub>3</sub>) δ 7.70 (d,  $J$  = 8.2 Hz, 2H), 7.27 (d,  $J$  = 8.1 Hz, 2H), 6.04 (d,  $J$  = 7.8 Hz, 1H), 5.94 (d,  $J$  = 7.7 Hz, 1H), 3.48 (q,  $J$  = 7.1 Hz, 2H), 2.41 (s, 3H), 1.32 (s, 9H), 1.12 (t,  $J$  = 7.1 Hz, 3H); <sup>13</sup>C NMR (100 MHz, CDCl<sub>3</sub>) δ 143.3, 136.5, 129.5, 127.2, 123.1, 118.4, 44.1, 43.2, 30.7, 21.5, 14.0. HRMS (ESI)  $m/z$  calcd. for C<sub>15</sub>H<sub>23</sub>NNaO<sub>2</sub>S<sub>2</sub><sup>+</sup> [M + Na]<sup>+</sup>: 336.1062, found: 336.1064.

**(Z)-N-benzyl-N-(2-(tert-butylthio)vinyl)-4-methylbenzenesulfonamide (4b)**

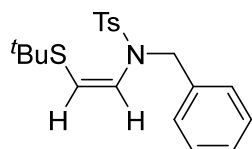

White solid, (69.0 mg, yield 92%);  $R_f$  = 0.2 (PE/EA = 20:1); <sup>1</sup>H NMR (400 MHz, CDCl<sub>3</sub>) δ 7.72 (d,  $J$  = 8.2 Hz, 2H), 7.33 – 7.22 (m, 7H), 5.96 (d,  $J$  = 7.4 Hz, 1H), 5.90 (d,  $J$  = 7.4 Hz, 1H), 4.60 (s, 2H), 2.42 (s, 3H), 1.20 (s, 9H); <sup>13</sup>C NMR (100 MHz, CDCl<sub>3</sub>) δ 143.4, 136.4, 136.4, 129.5, 128.2, 128.2, 127.4, 127.4, 123.3, 121.9, 51.9, 44.2, 30.7, 21.5. HRMS (ESI)  $m/z$  calcd. for C<sub>20</sub>H<sub>25</sub>NNaO<sub>2</sub>S<sub>2</sub><sup>+</sup> [M + Na]<sup>+</sup>: 398.1229, found: 398.1227.

**(Z)-N-(2-(tert-butylthio)vinyl)-4-methyl-N-phenethylbenzenesulfonamide (4c)**

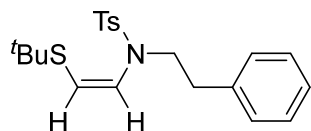

White solid, (75.5 mg, yield 97%);  $R_f$  = 0.2 (PE/EA = 20:1); <sup>1</sup>H NMR (400 MHz, CDCl<sub>3</sub>) δ 7.68 (d,  $J$  = 8.2 Hz, 2H), 7.28 – 7.15 (m, 7H), 6.15 (d,  $J$  = 7.8 Hz, 1H), 5.91 (d,  $J$  = 7.8 Hz, 1H), 3.68 – 3.61 (m, 2H), 2.91 – 2.83 (m, 2H), 2.39 (s, 3H), 1.33 (s, 9H); <sup>13</sup>C NMR (100 MHz, CDCl<sub>3</sub>) δ 143.4, 138.6, 136.4, 129.6, 129.0, 128.4, 127.2, 126.4, 123.5, 117.4, 49.6, 44.4, 35.3, 30.8, 21.5. HRMS (ESI)  $m/z$  calcd. for C<sub>21</sub>H<sub>27</sub>NNaO<sub>2</sub>S<sub>2</sub><sup>+</sup> [M + Na]<sup>+</sup>: 412.1375, found: 412.1382.



**(Z)-N-(2-((tert-butyldimethylsilyloxy)ethyl)-N-(2-(tert-butylthio)vinyl)-4-methylbenzenesulfonamide (4d)**

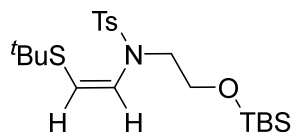

White solid, (80.6 mg, yield 91%);  $R_f = 0.2$  (PE/EA = 20:1);  $^1\text{H NMR}$  (400 MHz,  $\text{CDCl}_3$ )  $\delta$  7.66 (d,  $J = 7.9$  Hz, 2H), 7.22 (d,  $J = 7.9$  Hz, 2H), 6.04 (d,  $J = 7.6$  Hz, 1H), 5.89 (d,  $J = 7.6$  Hz, 1H), 3.70 (t,  $J = 7.0$  Hz, 2H), 3.48 (t,  $J = 7.0$  Hz, 2H), 2.36 (s, 3H), 1.26 (s, 9H), 0.83 (s, 9H), 0.00 (s, 6H);  $^{13}\text{C NMR}$  (100 MHz,  $\text{CDCl}_3$ )  $\delta$  143.3, 136.4, 129.5, 127.2, 123.7, 119.2, 61.3, 50.0, 44.1, 30.7, 25.9, 21.5, 18.2, -5.4. HRMS (ESI)  $m/z$  calcd. for  $\text{C}_{21}\text{H}_{37}\text{NNaO}_3\text{S}_2\text{Si}^+$  [ $\text{M} + \text{Na}$ ] $^+$ : 466.1876, found: 466.1885.

**(Z)-N-(2-(tert-butylthio)vinyl)-N-(furan-2-ylmethyl)-4-methylbenzenesulfonamide (4e)**

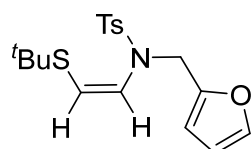

White solid, (70.0 mg, yield 96%);  $R_f = 0.2$  (PE/EA = 20:1);  $^1\text{H NMR}$  (400 MHz,  $\text{CDCl}_3$ )  $\delta$  7.71 – 7.64 (m, 2H), 7.27 – 7.24 (m, 2H), 6.23 (dt,  $J = 6.9, 2.5$  Hz, 2H), 6.06 (d,  $J = 7.2$  Hz, 1H), 5.93 (d,  $J = 7.2$  Hz, 1H), 4.67 (s, 2H), 2.40 (s, 3H), 1.28 (s, 9H);  $^{13}\text{C NMR}$  (100 MHz,  $\text{CDCl}_3$ )  $\delta$  149.9, 143.4, 142.1, 136.2, 129.4, 127.5, 123.0, 122.7, 110.2, 108.9, 44.7, 44.1, 30.7, 21.5. HRMS (ESI)  $m/z$  calcd. for  $\text{C}_{18}\text{H}_{23}\text{NNaO}_3\text{S}_2^+$  [ $\text{M} + \text{Na}$ ] $^+$ : 388.1012, found: 388.1022.

**(Z)-N-(2-(tert-butylthio)vinyl)-N-cyclopentyl-4-methylbenzenesulfonamide (4f)**

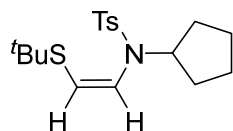

White solid, (40.2 mg, yield 57%);  $R_f = 0.2$  (PE/EA = 20:1);  $^1\text{H NMR}$  (400 MHz,  $\text{CDCl}_3$ )  $\delta$  7.73 (d,  $J = 8.0$  Hz, 2H), 7.27 (d,  $J = 7.8$  Hz, 2H), 6.57 (d,  $J = 6.7$  Hz, 1H), 5.64 (d,  $J = 6.7$  Hz, 1H), 4.28 (p,  $J = 8.0$  Hz, 1H), 2.41 (s, 3H), 1.67 (m, 2H), 1.55 – 1.37 (m, 6H), 1.34 (s, 9H);  $^{13}\text{C NMR}$  (100 MHz,  $\text{CDCl}_3$ )  $\delta$  143.1, 136.9, 133.7, 129.3, 127.8, 118.6, 60.6, 43.5, 31.0, 28.7, 23.8, 21.5. HRMS (ESI)  $m/z$  calcd. for  $\text{C}_{18}\text{H}_{27}\text{NNaO}_2\text{S}_2^+$  [ $\text{M} + \text{Na}$ ] $^+$ : 376.1375, found: 376.1371.

**(Z)-N-(2-(tert-butylthio)vinyl)-4-methyl-N-phenylbenzenesulfonamide (4g)**

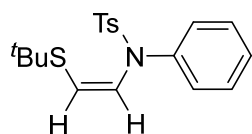

White solid, (57.8 mg, yield 80%);  $R_f = 0.2$  (PE/EA = 20:1);  $^1\text{H NMR}$  (400 MHz,  $\text{CDCl}_3$ )  $\delta$  7.57 – 7.43 (m, 2H), 7.30 – 7.18 (m, 5H), 7.16 – 7.00 (m, 2H), 6.61 (d,  $J = 7.9$  Hz, 1H), 5.73 (d,  $J = 7.9$  Hz, 1H), 2.40 (s, 3H), 1.18 (s, 9H);  $^{13}\text{C NMR}$  (100 MHz,  $\text{CDCl}_3$ )  $\delta$  143.8, 139.0, 135.2, 129.4, 128.7, 128.6, 127.7, 127.4, 124.4, 114.6, 43.9, 30.7, 21.6. HRMS (ESI)  $m/z$  calcd. for  $\text{C}_{19}\text{H}_{23}\text{NNaO}_2\text{S}_2^+$  [ $\text{M} + \text{Na}$ ] $^+$ : 384.1062, found: 384.1044.

**(Z)-N-(2-(tert-butylthio)vinyl)-N-(4-fluorophenyl)-4-methylbenzenesulfonamide (4h)**

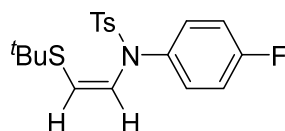

White solid, (60.6 mg, yield 80%);  $R_f = 0.2$  (PE/EA = 20:1);  $^1\text{H NMR}$  (400 MHz,  $\text{CDCl}_3$ )  $\delta$  7.48 (d,  $J = 8.4$  Hz, 2H), 7.24 (d,  $J = 8.1$  Hz, 2H), 7.04 (m, 2H), 6.98 – 6.92 (m, 2H), 6.60 (d,  $J = 8.0$  Hz, 1H), 5.68 (d,  $J = 8.0$  Hz, 1H), 2.41 (s, 3H), 1.18 (s, 9H);  $^{13}\text{C NMR}$  (100 MHz,  $\text{CDCl}_3$ )  $\delta$  161.75 (d,  $^2J = 247.6$  Hz), 144.0, 134.8, 134.74 (d,  $^4J = 3.2$  Hz), 130.79 (d,  $^3J = 8.8$  Hz), 129.5, 127.7, 124.2, 115.53 (d,  $J = 22.7$  Hz), 113.6, 44.0, 30.6, 21.6. HRMS (ESI)  $m/z$  calcd. for  $\text{C}_{19}\text{H}_{22}\text{FNNaO}_2\text{S}_2^+$  [ $\text{M} + \text{Na}$ ] $^+$ : 402.0968, found: 402.0699.

**(Z)-4-(tert-butyl)-N-(2-(tert-butylthio)vinyl)-N-methylbenzenesulfonamide (4i)**

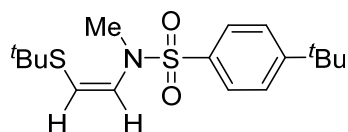

White solid, (66.8 mg, yield 98%);  $R_f = 0.2$  (PE/EA = 20:1);  $^1\text{H NMR}$  (400 MHz,  $\text{CDCl}_3$ )  $\delta$  7.73 (d,  $J = 8.5$  Hz, 2H), 7.51 (d,  $J = 8.6$  Hz, 2H), 6.32 (d,  $J = 8.0$  Hz, 1H), 5.72 (d,  $J = 7.9$  Hz, 1H), 3.11 (s, 3H), 1.34 (s, 9H), 1.29 (s, 9H);  $^{13}\text{C NMR}$  (100 MHz,  $\text{CDCl}_3$ )  $\delta$  156.6, 134.9, 127.2, 126.3, 126.0, 113.5, 44.2, 36.0, 35.1, 31.1, 30.6. HRMS (ESI)  $m/z$  calcd. for  $\text{C}_{17}\text{H}_{27}\text{NNaO}_2\text{S}_2^+$  [ $\text{M} + \text{Na}$ ] $^+$ : 364.1375, found: 364.1141.

**(Z)-N-(2-(tert-butylthio)vinyl)-N-methylmethanesulfonamide (4j)**

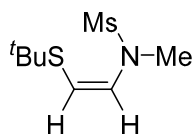

Yellow oil, (41.5 mg, yield 93%);  $R_f = 0.2$  (PE/EA = 10:1);  $^1\text{H NMR}$  (400 MHz,  $\text{CDCl}_3$ )  $\delta$  6.27 (d,  $J = 7.8$  Hz, 1H), 5.84 (d,  $J = 7.8$  Hz, 1H), 3.17 (s, 3H), 2.87 (s, 3H), 1.36 (s, 9H);  $^{13}\text{C NMR}$  (100MHz,  $\text{CDCl}_3$ )  $\delta$  125.5, 115.6, 44.5, 37.7, 35.6, 30.7. HRMS (ESI)  $m/z$  calcd. for  $\text{C}_8\text{H}_{18}\text{NO}_2\text{S}_2^+$   $[\text{M} + \text{H}]^+$ : 224.0773, found: 224.0788.

#### (Z)-3-(2-(tert-butylthio)vinyl)oxazolidin-2-one (4k)

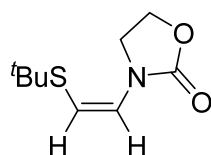

White solid, (39.4 mg, yield 98%);  $R_f = 0.2$  (PE/EA = 8:1);  $^1\text{H NMR}$  (400 MHz,  $\text{CDCl}_3$ )  $\delta$  6.68 (d,  $J = 8.7$  Hz, 1H), 5.40 (d,  $J = 8.7$  Hz, 1H), 4.36 (t,  $J = 7.9$  Hz, 2H), 4.20 (t,  $J = 7.8$  Hz, 2H), 1.32 (s, 9H);  $^{13}\text{C NMR}$  (100 MHz,  $\text{CDCl}_3$ )  $\delta$  156.6, 125.5, 101.9, 62.6, 45.4, 44.8, 30.5. HRMS (ESI)  $m/z$  calcd. for  $\text{C}_9\text{H}_{15}\text{NNaO}_2\text{S}^+$   $[\text{M} + \text{Na}]^+$ : 224.0716, found: 224.0721.

#### (Z)-N-benzyl-N-(2-(tert-butylthio)vinyl)-4-methylbenzamide (4l)

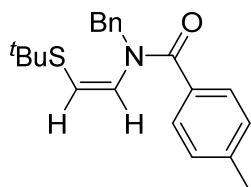

Yellow oil, (54.2 mg, yield 80%);  $R_f = 0.2$  (PE/EA = 25:1);  $^1\text{H NMR}$  (400 MHz,  $\text{CDCl}_3$ )  $\delta$  7.75 – 7.69 (m, 2H), 7.35 – 7.22 (m, 7H), 5.97 (d,  $J = 7.3$  Hz, 1H), 5.89 (d,  $J = 7.4$  Hz, 1H), 4.59 (s, 2H), 2.42 (s, 3H), 1.20 (s, 9H), 1.05 (s, 2H);  $^{13}\text{C NMR}$  (100 MHz,  $\text{CDCl}_3$ )  $\delta$  143.4, 136.4, 129.5, 128.2, 128.1, 127.4, 127.4, 123.3, 122.0, 51.9, 44.2, 30.6, 21.5, 17.7, 12.3. HRMS (ESI)  $m/z$  calcd. for  $\text{C}_{21}\text{H}_{25}\text{NNaOS}^+$   $[\text{M} + \text{Na}]^+$ : 362.1549, found: 362.2410.

#### Benzyl (Z)-butyl(2-(tert-butylthio)vinyl)carbamate (4m)

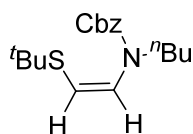

Colorless oil, (50.2 mg, yield 78%);  $R_f = 0.3$  (PE/EA = 20:1);  $^1\text{H NMR}$  (600 MHz,

CDCl<sub>3</sub>)  $\delta$  7.39 – 7.33 (m, 4H), 7.33 – 7.29 (m, 1H), 6.49 (s, 1H), 5.56 (d,  $J$  = 8.5 Hz, 1H), 5.17 (s, 2H), 3.72 – 3.66 (m, 2H), 1.59 – 1.52 (m, 2H), 1.36 (s, 9H), 1.33 – 1.29 (m, 2H), 0.91 (t,  $J$  = 7.4 Hz, 3H). <sup>13</sup>C NMR (150 MHz, CDCl<sub>3</sub>)  $\delta$  128.55, 128.55, 128.12, 128.05, 128.05, 67.65, 46.17, 44.34, 30.80, 30.80, 19.95, 13.97. HRMS (ESI)  $m/z$  calcd. for C<sub>18</sub>H<sub>28</sub>NO<sub>2</sub>S<sup>+</sup> [M + H]<sup>+</sup>: 322.1835, found: 322.1829.

**(Z)-9-(2-(tert-butylthio)vinyl)-9H-carbazole (4n)**

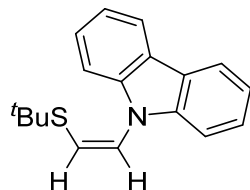

Yellow solid, (48.9 mg, yield 87%);  $R_f$  = 0.2 (PE/EA = 50:1); <sup>1</sup>H NMR (400 MHz, CDCl<sub>3</sub>)  $\delta$  8.12 (d,  $J$  = 7.7 Hz, 2H), 7.50 (m, 2H), 7.38 (d,  $J$  = 8.1 Hz, 2H), 7.31 (t,  $J$  = 7.5 Hz, 2H), 6.94 (d,  $J$  = 7.2 Hz, 1H), 6.65 (d,  $J$  = 7.3 Hz, 1H), 1.43 (s, 9H); <sup>13</sup>C NMR (100 MHz, CDCl<sub>3</sub>)  $\delta$  139.8, 125.7, 123.7, 123.5, 120.3, 120.2, 119.9, 110.8, 44.4, 31.0. HRMS (ESI)  $m/z$  calcd. for C<sub>21</sub>H<sub>25</sub>NNaOS<sup>+</sup> [M + Na]<sup>+</sup>: 362.1549, found: 362.2410.

**N-((Z)-2-(tert-butylthio)vinyl)-N-(5-((N-((Z)-2-(tert-butylthio)vinyl)-4-methylphenyl)sulfonamido)pentyl)-4-methylbenzenesulfonamide (4o)**

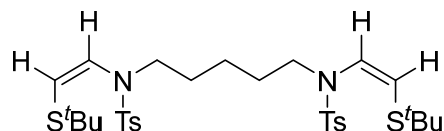

White solid, (54.2 mg, yield 80%);  $R_f$  = 0.2 (PE/EA = 3:1); <sup>1</sup>H NMR (400 MHz, CDCl<sub>3</sub>)  $\delta$  7.67 (d,  $J$  = 8.2 Hz, 4H), 7.27 (d,  $J$  = 5.8 Hz, 4H), 5.96 (d,  $J$  = 1.6 Hz, 4H), 3.32 (t,  $J$  = 7.2 Hz, 4H), 2.41 (s, 6H), 1.52 (dt,  $J$  = 14.8, 7.5 Hz, 4H), 1.40 – 1.33 (m, 2H), 1.31 (s, 18H). <sup>13</sup>C NMR (100 MHz, CDCl<sub>3</sub>)  $\delta$  143.3, 136.3, 129.5, 127.2, 123.4, 119.7, 48.3, 44.1, 30.7, 28.1, 23.6, 21.5. HRMS (ESI)  $m/z$  calcd. for C<sub>31</sub>H<sub>46</sub>N<sub>2</sub>NaO<sub>4</sub>S<sub>4</sub><sup>+</sup> [M + Na]<sup>+</sup>: 661.2233, found: 661.2230.

**(Z)-N-(2-(tert-butylthio)prop-1-en-1-yl)-N,4-dimethylbenzenesulfonamide (6a)**

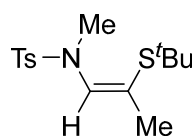

White solid, (57.0 mg, yield 91%);  $R_f = 0.2$  (PE/EA = 10:1);  $^1\text{H NMR}$  (400 MHz,  $\text{CDCl}_3$ )  $\delta$  7.68 (d,  $J = 8.3$  Hz, 2H), 7.30 (d,  $J = 8.0$  Hz, 2H), 6.36 (d,  $J = 1.4$  Hz, 1H), 3.09 (s, 3H), 2.41 (s, 3H), 2.04 (d,  $J = 1.3$  Hz, 3H), 1.32 (s, 9H);  $^{13}\text{C NMR}$  (100 MHz,  $\text{CDCl}_3$ )  $\delta$  143.6, 135.1, 131.2, 129.7, 127.5, 125.1, 47.1, 37.2, 32.1, 26.3, 21.6. HRMS (ESI)  $m/z$  calcd. for  $\text{C}_{15}\text{H}_{23}\text{NNaO}_2\text{S}_2^+$  [ $\text{M} + \text{Na}$ ] $^+$ : 336.1056, found: 336.1062.

**(Z)-N-(2-(hexylthio)prop-1-en-1-yl)-N,4-dimethylbenzenesulfonamide (6b)**

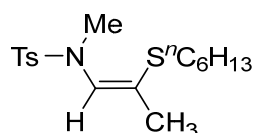

White solid, (62.0 mg, yield 91%);  $R_f = 0.2$  (PE/EA = 10:1);  $^1\text{H NMR}$  (400 MHz,  $\text{CDCl}_3$ )  $\delta$  7.69 (d,  $J = 8.3$  Hz, 2H), 7.29 (d,  $J = 8.1$  Hz, 2H), 5.70 (d,  $J = 1.7$  Hz, 1H), 2.91 (s, 3H), 2.70 – 2.63 (m, 2H), 2.41 (s, 3H), 1.95 (d,  $J = 1.4$  Hz, 3H), 1.56 – 1.44 (m, 2H), 1.39 – 1.24 (m, 6H), 0.87 (t,  $J = 6.8$  Hz, 3H);  $^{13}\text{C NMR}$  (100 MHz,  $\text{CDCl}_3$ )  $\delta$  143.4, 134.6, 134.6, 129.5, 127.6, 123.0, 36.8, 31.4, 30.2, 30.0, 28.5, 22.5, 21.5, 20.3, 14.0. HRMS (ESI)  $m/z$  calcd. for  $\text{C}_{17}\text{H}_{27}\text{NNaO}_2\text{S}_2^+$  [ $\text{M} + \text{Na}$ ] $^+$ : 364.1375, found: 364.1371.

**(Z)-N-(2-(cyclohexylthio)prop-1-en-1-yl)-N,4-dimethylbenzenesulfonamide (6c)**

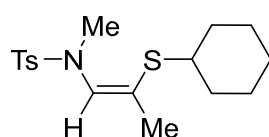

White solid, (63.7 mg, yield 94%);  $R_f = 0.2$  (PE/EA = 10:1);  $^1\text{H NMR}$  (400 MHz,  $\text{CDCl}_3$ )  $\delta$  7.68 (d,  $J = 8.3$  Hz, 2H), 7.30 (d,  $J = 8.0$  Hz, 2H), 6.16 (d,  $J = 7.8$  Hz, 1H), 5.65 (d,  $J = 7.8$  Hz, 1H), 3.06 (s, 3H), 2.78 – 2.67 (m, 1H), 2.42 (s, 3H), 1.99 – 1.89 (m, 2H), 1.72 (dt,  $J = 6.8, 3.3$  Hz, 2H), 1.40 – 1.16 (m, 6H).  $^{13}\text{C NMR}$  (100 MHz,  $\text{CDCl}_3$ )  $\delta$  143.4, 134.8, 132.0, 129.5, 127.5, 124.8, 42.3, 36.9, 33.8, 26.0, 25.6, 21.5, 21.2. HRMS (ESI)  $m/z$  calcd. for  $\text{C}_{17}\text{H}_{25}\text{NNaO}_2\text{S}_2^+$  [ $\text{M} + \text{Na}$ ] $^+$ : 362.1219, found: 362.1214.

**(Z)-N-(2-(benzylthio)prop-1-en-1-yl)-N,4-dimethylbenzenesulfonamide (6d)**

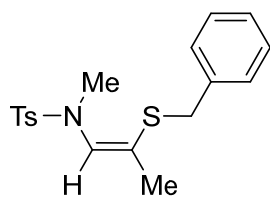

White solid, (63.8 mg, yield 92%);  $R_f = 0.2$  (PE/EA = 10:1);  $^1\text{H NMR}$  (400 MHz,  $\text{CDCl}_3$ )  $\delta$  7.73 – 7.65 (m, 2H), 7.32 – 7.26 (m, 6H), 7.22 (dt,  $J = 8.8, 4.3$  Hz, 1H), 5.76 (q,  $J = 1.4$  Hz, 1H), 3.93 (s, 2H), 2.84 (s, 3H), 2.42 (s, 3H), 1.97 (d,  $J = 1.5$  Hz, 3H);  $^{13}\text{C NMR}$  (100 MHz,  $\text{CDCl}_3$ )  $\delta$  143.5, 137.6, 134.5, 133.4, 129.6, 128.7, 128.5, 127.6, 127.1, 124.0, 36.7, 35.1, 21.5, 20.8. HRMS (ESI)  $m/z$  calcd. for  $\text{C}_{18}\text{H}_{21}\text{NNaO}_2\text{S}_2^+$   $[\text{M} + \text{Na}]^+$ : 370.0906, found: 370.0903.

**(Z)-N,4-dimethyl-N-(2-(phenylthio)prop-1-en-1-yl)benzenesulfonamide (6e)**

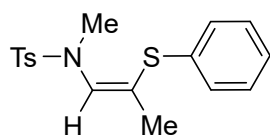

White solid, (55.9 mg, yield 84%);  $R_f = 0.2$  (PE/EA = 20:1);  $^1\text{H NMR}$  (400 MHz,  $\text{CDCl}_3$ )  $\delta$  7.73 (d,  $J = 8.3$  Hz, 2H), 7.34 – 7.25 (m, 7H), 5.97 (d,  $J = 1.5$  Hz, 1H), 3.02 (s, 3H), 2.43 (s, 3H), 1.77 (d,  $J = 1.4$  Hz, 3H);  $^{13}\text{C NMR}$  (100 MHz,  $\text{CDCl}_3$ )  $\delta$  143.7, 134.6, 132.7, 132.4, 131.6, 129.6, 129.2, 128.9, 127.6, 125.7, 37.1, 21.6, 21.1. HRMS (ESI)  $m/z$  calcd. for  $\text{C}_{17}\text{H}_{19}\text{NNaO}_2\text{S}_2^+$   $[\text{M} + \text{Na}]^+$ : 356.0749, found: 356.0745.

**(Z)-N-(2-((4-methoxyphenyl)thio)prop-1-en-1-yl)-N,4-dimethylbenzenesulfonamide (6f)**

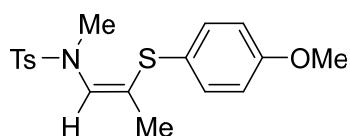

White solid, (60.3 mg, yield 83%);  $R_f = 0.2$  (PE/EA = 10:1);  $^1\text{H NMR}$  (400 MHz,  $\text{CDCl}_3$ )  $\delta$  7.73 (d,  $J = 8.3$  Hz, 2H), 7.35 – 7.27 (m, 4H), 6.82 (d,  $J = 8.7$  Hz, 2H), 5.71 (q,  $J = 1.4$  Hz, 1H), 3.79 (s, 3H), 2.98 (s, 3H), 2.43 (s, 3H), 1.66 (d,  $J = 1.4$  Hz, 3H);  $^{13}\text{C NMR}$  (100 MHz,  $\text{CDCl}_3$ )  $\delta$  159.9, 143.6, 136.0, 136.0, 134.5, 129.6, 127.7, 122.8, 122.1, 114.5, 55.3, 37.2, 21.5, 20.6. HRMS (ESI)  $m/z$  calcd. for  $\text{C}_{18}\text{H}_{21}\text{NNaO}_3\text{S}_2^+$   $[\text{M} + \text{Na}]^+$ : 386.0855, found: 386.0851.

**(Z)-N,4-dimethyl-N-(2-(m-tolylthio)prop-1-en-1-yl)benzenesulfonamide (6g)**

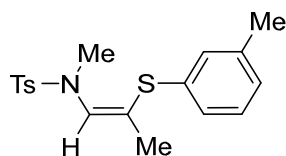

White solid, (61.0 mg, yield 88%);  $R_f = 0.2$  (PE/EA = 20:1);  $^1\text{H NMR}$  (400 MHz,  $\text{CDCl}_3$ )  $\delta$  7.73 (d,  $J = 8.2$  Hz, 2H), 7.32 (d,  $J = 8.1$  Hz, 2H), 7.19 – 7.05 (m, 4H), 5.96 (d,  $J = 1.5$  Hz, 1H), 3.02 (s, 3H), 2.43 (s, 3H), 2.31 (s, 3H), 1.76 (d,  $J = 1.3$  Hz, 3H);  $^{13}\text{C NMR}$  (100 MHz,  $\text{CDCl}_3$ )  $\delta$  143.6, 138.7, 134.7, 133.4, 132.4, 132.0, 129.8, 129.6, 128.7, 128.5, 127.6, 125.4, 37.1, 21.6, 21.3, 21.1. HRMS (ESI)  $m/z$  calcd. for  $\text{C}_{18}\text{H}_{21}\text{NNaO}_2\text{S}_2^+$  [ $\text{M} + \text{Na}$ ] $^+$ : 370.0906, found: 370.0903.

**(Z)-N,4-dimethyl-N-(2-(p-tolylthio)prop-1-en-1-yl)benzenesulfonamide (6h)**

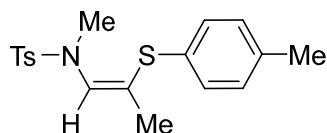

White solid, (61.0 mg, yield 88%);  $R_f = 0.2$  (PE/EA = 20:1);  $^1\text{H NMR}$  (400 MHz,  $\text{CDCl}_3$ )  $\delta$  7.77 – 7.70 (m, 2H), 7.32 (dd,  $J = 7.6, 4.9$  Hz, 3H), 7.22 – 7.17 (m, 2H), 7.14 – 7.08 (m, 1H), 5.91 (d,  $J = 1.4$  Hz, 1H), 3.01 (s, 3H), 2.43 (s, 3H), 2.34 (s, 3H), 1.66 (d,  $J = 1.4$  Hz, 3H);  $^{13}\text{C NMR}$  (100 MHz,  $\text{CDCl}_3$ )  $\delta$  143.6, 141.1, 134.2, 131.2, 130.3, 129.6, 128.3, 127.7, 126.4, 124.7, 36.9, 21.5, 20.7. HRMS (ESI)  $m/z$  calcd. for  $\text{C}_{18}\text{H}_{21}\text{NNaO}_2\text{S}_2^+$  [ $\text{M} + \text{Na}$ ] $^+$ : 370.0906, found: 370.0903.

**(Z)-N-(2-((4-chlorophenyl)thio)prop-1-en-1-yl)-N,4-dimethylbenzenesulfonamide (6i)**

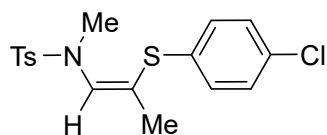

White solid, (61.8 mg, yield 84%);  $R_f = 0.2$  (PE/EA = 20:1);  $^1\text{H NMR}$  (400 MHz,  $\text{CDCl}_3$ )  $\delta$  7.74 – 7.68 (m, 2H), 7.32 (d,  $J = 8.0$  Hz, 2H), 7.24 (s, 4H), 5.94 (d,  $J = 1.4$  Hz, 1H), 2.98 (s, 3H), 2.43 (s, 3H), 1.76 (d,  $J = 1.4$  Hz, 3H);  $^{13}\text{C NMR}$  (100 MHz,  $\text{CDCl}_3$ )  $\delta$  143.8, 134.4, 133.9, 133.8, 131.7, 131.1, 129.7, 129.1, 127.6, 126.3, 37.1, 21.6, 21.1. HRMS (ESI)  $m/z$  calcd. for  $\text{C}_{17}\text{H}_{18}\text{ClNNaO}_2\text{S}_2^+$  [ $\text{M} + \text{Na}$ ] $^+$ : 390.0360, found: 390.0355.

**(Z)-N-(2-(tert-butylthio)hex-1-en-1-yl)-N,4-dimethylbenzenesulfonamide (6j)**

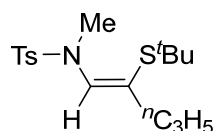

White solid, (67.5 mg, yield 99%);  $R_f = 0.2$  (PE/EA = 10:1);  $^1\text{H NMR}$  (400 MHz,  $\text{CDCl}_3$ )  $\delta$  7.68 (d,  $J = 7.9$  Hz, 2H), 7.30 (d,  $J = 7.9$  Hz, 2H), 6.50 (s, 1H), 3.13 (s, 3H), 2.42 (s, 3H), 2.22 (t,  $J = 7.4$  Hz, 2H), 1.53 (dt,  $J = 14.7, 7.3$  Hz, 2H), 1.29 (s, 9H), 0.83 (t,  $J = 7.3$  Hz, 3H).  $^{13}\text{C NMR}$  (100 MHz,  $\text{CDCl}_3$ )  $\delta$  143.6, 134.9, 132.5, 129.7, 127.9, 127.4, 47.5, 41.3, 37.4, 31.9, 21.9, 21.5, 13.3. HRMS (ESI)  $m/z$  calcd. for  $\text{C}_{17}\text{H}_{27}\text{NNaO}_2\text{S}_2^+$   $[\text{M} + \text{Na}]^+$ : 364.1375, found: 364.1369.

**(Z)-N-(2-(tert-butylthio)oct-1-en-1-yl)-N,4-dimethylbenzenesulfonamide (6k)**

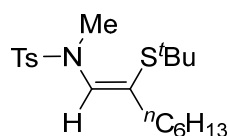

White solid, (75.8 mg, yield 99%);  $R_f = 0.2$  (PE/EA = 10:1);  $^1\text{H NMR}$  (400 MHz,  $\text{CDCl}_3$ )  $\delta$  7.68 (d,  $J = 8.0$  Hz, 2H), 7.30 (d,  $J = 7.9$  Hz, 2H), 6.50 (s, 1H), 3.13 (s, 3H), 2.41 (s, 3H), 2.24 (t,  $J = 7.5$  Hz, 2H), 1.48 (p,  $J = 7.2$  Hz, 2H), 1.29 (s, 9H), 1.23 (m, 6H), 0.85 (t,  $J = 6.7$  Hz, 3H);  $^{13}\text{C NMR}$  (100 MHz,  $\text{CDCl}_3$ )  $\delta$  143.6, 135.0, 132.4, 129.7, 128.1, 127.4, 47.5, 39.4, 37.4, 31.9, 31.6, 28.8, 28.5, 22.6, 21.5, 14.1. HRMS (ESI)  $m/z$  calcd. for  $\text{C}_{20}\text{H}_{33}\text{NNaO}_2\text{S}_2^+$   $[\text{M} + \text{Na}]^+$ : 406.1845, found: 406.1840.

**(Z)-N-(2-(tert-butylthio)-2-cyclopropylvinyl)-N,4-dimethylbenzenesulfonamide (6l)**

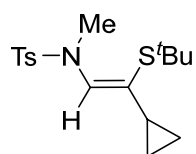

White solid, (62.4 mg, yield 92%);  $R_f = 0.2$  (PE/EA = 10:1);  $^1\text{H NMR}$  (400 MHz,  $\text{CDCl}_3$ )  $\delta$  7.68 (d,  $J = 8.0$  Hz, 2H), 7.31 (d,  $J = 8.0$  Hz, 2H), 6.56 (s, 1H), 3.15 (s, 3H), 2.43 (s, 3H), 1.34 (s, 9H), 0.74 – 0.67 (m, 2H), 0.59 – 0.52 (m, 2H);  $^{13}\text{C NMR}$  (100 MHz,  $\text{CDCl}_3$ )  $\delta$  143.7, 134.9, 131.6, 129.8, 128.2, 127.4, 47.8, 37.0, 31.9, 31.0, 21.6, 19.7, 7.4. HRMS (ESI)  $m/z$  calcd. for  $\text{C}_{17}\text{H}_{25}\text{NNaO}_2\text{S}_2^+$   $[\text{M} + \text{Na}]^+$ : 362.1219, found: 362.1211.

**(Z)-N-(2-(hexylthio)-3,3-dimethylbut-1-en-1-yl)-N-methylmethanesulfonamide (6m)**



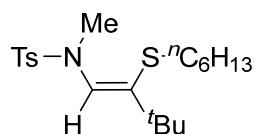

Colorless oil, (48 mg, yield 78%);  $R_f = 0.2$  (PE/EA =20:1);  $^1\text{H NMR}$  (600 MHz,  $\text{CDCl}_3$ )  $\delta$  6.36 (s, 1H), 3.19 (s, 3H), 2.90 (s, 3H), 2.72 (t,  $J = 7.4$  Hz, 2H), 1.54 (m,  $J = 7.4$  Hz, 2H), 1.39 – 1.35 (m, 2H), 1.27 (m,  $J = 3.3$  Hz, 4H), 1.16 (s, 9H), 0.87 (t,  $J = 6.9$  Hz, 3H).  $^{13}\text{C NMR}$  (150 MHz,  $\text{CDCl}_3$ )  $\delta$  141.88, 126.34, 38.08, 36.04, 34.89, 33.88, 31.58, 29.46, 29.42, 28.69, 22.67, 14.16. HRMS (ESI)  $m/z$  calcd. for  $\text{C}_{14}\text{H}_{30}\text{NO}_2\text{S}_2^+$   $[\text{M} + \text{H}]^+$ : 308.1712, found: 308.1705.

**(Z)-N-(2-(tert-butylthio)-2-phenylvinyl)-N,4-dimethylbenzenesulfonamide (6n)**

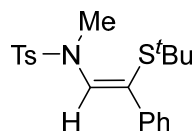

Colorless oil, (32.3 mg, yield 43%);  $R_f = 0.2$  (PE/EA =20:1);  $^1\text{H NMR}$  (600 MHz,  $\text{CDCl}_3$ )  $\delta$  7.75 – 7.69 (m, 2H), 7.54 – 7.50 (m, 2H), 7.35 – 7.27 (m, 5H), 6.94 (s, 1H), 3.36 (s, 3H), 2.44 (s, 3H), 1.09 (s, 9H).  $^{13}\text{C NMR}$  (150 MHz,  $\text{CDCl}_3$ )  $\delta$  143.99, 142.42, 134.98, 134.32, 129.93, 128.38, 128.25, 127.62, 127.41, 47.88, 37.18, 31.76, 21.70. HRMS (ESI)  $m/z$  calcd. for  $\text{C}_{20}\text{H}_{25}\text{NNaO}_2\text{S}_2^+$   $[\text{M} + \text{Na}]^+$ : 398.1219, found: 398.1213.

**(E)-N-(2-(tert-butylthio)-2-phenylvinyl)-N,4-dimethylbenzenesulfonamide (6n')**

Colorless oil, (30.1 mg, yield 40%);  $R_f = 0.15$  (PE/EA =20:1);  $^1\text{H NMR}$  (600 MHz, Chloroform-*d*)  $\delta$  7.72 (d,  $J = 8.3$  Hz, 2H), 7.53 (d,  $J = 7.3$  Hz, 2H), 7.28 – 7.21 (m, 4H), 7.19 – 7.16 (m, 1H), 6.46 (s, 1H), 3.10 (s, 3H), 2.38 (s, 3H), 1.33 (s, 9H).  $^{13}\text{C NMR}$  (150 MHz, Chloroform-*d*)  $\delta$  143.79, 136.15, 135.73, 129.88, 129.76, 128.14, 128.09, 128.04, 49.37, 37.35, 31.62, 21.73. HRMS (ESI)  $m/z$  calcd. for  $\text{C}_{20}\text{H}_{25}\text{NNaO}_2\text{S}_2^+$   $[\text{M} + \text{Na}]^+$ : 398.1219, found: 398.1214.

**Methyl (Z)-N-(tert-butoxycarbonyl)-S-(2-((N,4-dimethylphenyl)sulfonamido)vinyl)-L-cysteinate (9a)**

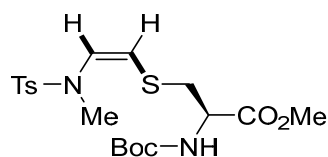

Colorless oil, (79.9 mg, yield 90%);  $R_f = 0.2$  (PE/EA =4:1);  $^1\text{H NMR}$  (400 MHz,  $\text{CDCl}_3$ )  $\delta$  7.69 – 7.62 (m, 2H), 7.32 – 7.28 (m, 2H), 6.10 (d,  $J = 7.7$  Hz, 1H), 5.52 (d,  $J = 7.7$

Hz, 1H), 5.31 (d,  $J = 7.9$  Hz, 1H), 4.51 (dt,  $J = 9.2, 4.9$  Hz, 1H), 3.70 (s, 3H), 3.07 (t,  $J = 5.5$  Hz, 2H), 3.01 (s, 3H), 2.41 (s, 3H), 1.42 (s, 2H), 1.41 (s, 9H);  $^{13}\text{C}$  NMR (100 MHz,  $\text{CDCl}_3$ )  $\delta$  170.8, 154.9, 143.9, 134.5, 129.7, 127.3, 126.0, 117.7, 80.3, 53.7, 52.6, 37.3, 35.6, 28.3, 21.6. HRMS (ESI)  $m/z$  calcd. for  $\text{C}_{19}\text{H}_{28}\text{N}_2\text{NaO}_6\text{S}_2^+$  [ $\text{M} + \text{Na}$ ] $^+$ : 467.1281, found: 467.1292.

**Methyl (Z)-N-(tert-butoxycarbonyl)-S-(2-((4-methyl-N-phenethylphenyl)sulfonamido)vinyl)-L-cysteinate (9b)**

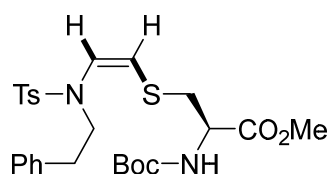

Colorless Oil, (66.2 mg, yield 62%);  $R_f = 0.2$  (PE/EA = 4:1);  $^1\text{H}$  NMR (400 MHz,  $\text{CDCl}_3$ )  $\delta$  7.70 – 7.64 (m, 2H), 7.30 – 7.25 (m, 4H), 7.21 (d,  $J = 7.0$  Hz, 3H), 5.94 (d,  $J = 7.5$  Hz, 1H), 5.79 (d,  $J = 7.3$  Hz, 1H), 5.40 – 5.32 (m, 1H), 4.55 (t,  $J = 6.2$  Hz, 1H), 3.72 (s, 3H), 3.53 (td,  $J = 7.2, 6.5, 2.1$  Hz, 2H), 3.16 (d,  $J = 4.8$  Hz, 2H), 2.86 (t,  $J = 8.1$  Hz, 2H), 2.41 (s, 3H), 1.43 (d,  $J = 1.6$  Hz, 9H);  $^{13}\text{C}$  NMR (100 MHz,  $\text{CDCl}_3$ )  $\delta$  170.7, 155.0, 143.7, 138.3, 135.9, 129.7, 128.9, 128.5, 128.5, 127.3, 126.5, 123.5, 80.3, 53.9, 52.6, 50.1, 37.1, 35.3, 28.3, 21.5. HRMS (ESI)  $m/z$  calcd. for  $\text{C}_{26}\text{H}_{34}\text{N}_2\text{NaO}_6\text{S}_2^+$  [ $\text{M} + \text{Na}$ ] $^+$ : 557.1750, found: 557.1750.

**Methyl (Z)-N-(tert-butoxycarbonyl)-S-(2-((4-(tert-butyl)-N-methylphenyl)sulfonamido)vinyl)-L-cysteinate (9c)**

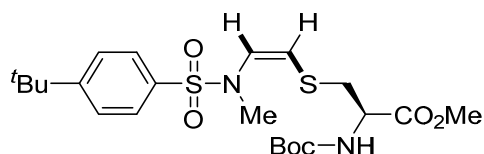

Colorless Oil, (89.4 mg, yield 92%);  $R_f = 0.2$  (PE/EA = 5:1);  $^1\text{H}$  NMR (400 MHz,  $\text{CDCl}_3$ )  $\delta$  7.70 (d,  $J = 8.6$  Hz, 2H), 7.51 (d,  $J = 8.6$  Hz, 2H), 6.15 (d,  $J = 7.7$  Hz, 1H), 5.51 (d,  $J = 7.8$  Hz, 1H), 5.35 – 5.27 (m, 1H), 4.57 – 4.47 (m, 1H), 3.71 (s, 3H), 3.09 (dd,  $J = 7.4, 4.9$  Hz, 2H), 3.04 (s, 3H), 1.42 (s, 9H), 1.33 (s, 9H);  $^{13}\text{C}$  NMR (100 MHz,  $\text{CDCl}_3$ )  $\delta$  170.8, 156.8, 154.9, 134.5, 127.8, 127.2, 126.1, 116.9, 80.3, 53.7, 52.6, 37.4, 35.6, 35.2, 31.1, 28.3. HRMS (ESI)  $m/z$  calcd. for  $\text{C}_{26}\text{H}_{34}\text{N}_2\text{NaO}_6\text{S}_2^+$  [ $\text{M} + \text{Na}$ ] $^+$ : 509.1756, found: 509.1756.

**Methyl (Z)-N-(tert-butoxycarbonyl)-S-(2-(N-methylmethylsulfonamido)vinyl)-L-**

**cysteinate (9d)**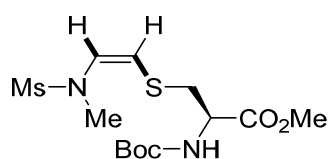

Colorless Oil, (50.0 mg, yield 68%);  $R_f = 0.2$  (PE/EA = 3:1);  $^1\text{H NMR}$  (400 MHz,  $\text{CDCl}_3$ )  $\delta$  6.17 (d,  $J = 7.6$  Hz, 1H), 5.55 (d,  $J = 7.6$  Hz, 1H), 5.37 (d,  $J = 7.9$  Hz, 1H), 4.51 (dt,  $J = 8.7, 4.9$  Hz, 1H), 3.70 (s, 3H), 3.12 (s, 3H), 3.04 (dd,  $J = 14.0, 5.0$  Hz, 2H), 2.85 (s, 3H), 1.38 (s, 9H);  $^{13}\text{C NMR}$  (100 MHz,  $\text{CDCl}_3$ )  $\delta$  170.7, 154.9, 125.8, 117.5, 80.2, 53.6, 52.6, 37.5, 37.1, 35.4, 28.2. HRMS (ESI)  $m/z$  calcd. for  $\text{C}_{13}\text{H}_{24}\text{N}_2\text{NaO}_6\text{S}_2^+$  [ $\text{M} + \text{Na}$ ] $^+$ : 391.0968, found: 391.0968.

**Methyl (Z)-S-(2-(N-benzyl-4-methylbenzamido)vinyl)-N-((benzyloxy)carbonyl)-L-cysteinate (9e)**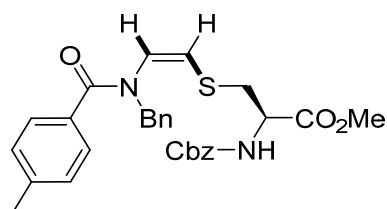

White solid, (71.5 mg, yield 69%);  $R_f = 0.2$  (PE/EA = 5:1);  $^1\text{H NMR}$  (400 MHz,  $\text{CDCl}_3$ )  $\delta$  7.69 (d,  $J = 8.0$  Hz, 2H), 7.39 – 7.21 (m, 12H), 5.71 (d,  $J = 7.1$  Hz, 1H), 5.58 (d,  $J = 7.1$  Hz, 1H), 5.37 (d,  $J = 8.0$  Hz, 1H), 5.14 – 5.01 (m, 2H), 4.53 (dt,  $J = 8.3, 4.3$  Hz, 1H), 4.42 (q,  $J = 14.6$  Hz, 2H), 3.69 (s, 3H), 3.14 (dd,  $J = 14.4, 4.0$  Hz, 1H), 3.01 (dd,  $J = 14.4, 4.7$  Hz, 1H), 2.42 (s, 3H);  $^{13}\text{C NMR}$  (100 MHz,  $\text{CDCl}_3$ )  $\delta$  170.1, 155.5, 143.8, 136.2, 135.9, 135.6, 129.7, 128.5, 128.4, 128.3, 128.2, 128.2, 128.2, 127.8, 127.5, 127.2, 123.4, 67.1, 54.3, 52.7, 52.7, 36.8, 21.6. HRMS (ESI)  $m/z$  calcd. for  $\text{C}_{29}\text{H}_{31}\text{N}_2\text{O}_5\text{S}^+$  [ $\text{M} + \text{H}$ ] $^+$ : 519.1948, found: 519.1949.

**Methyl (Z)-N-((benzyloxy)carbonyl)-S-(2-((N,4-dimethylphenyl) sulfonamido)vinyl)-L-cysteinate (9f)**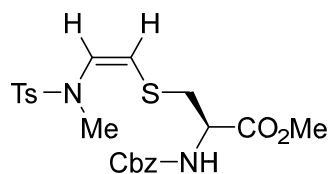

Colorless Oil, (79.3 mg, yield 83%);  $R_f = 0.2$  (PE/EA = 4:1);  $^1\text{H NMR}$  (400 MHz,  $\text{CDCl}_3$ )  $\delta$  7.65 (d,  $J = 8.1$  Hz, 2H), 7.38 – 7.26 (m, 7H), 6.06 (d,  $J = 7.6$  Hz, 1H), 5.63 (d,  $J =$

7.9 Hz, 1H), 5.49 (d,  $J = 7.7$  Hz, 1H), 5.14 – 5.06 (m, 2H), 4.60 (dt,  $J = 8.7, 4.8$  Hz, 1H), 3.72 (s, 3H), 3.11 (t,  $J = 3.9$  Hz, 2H), 2.99 (s, 3H), 2.40 (s, 3H);  $^{13}\text{C}$  NMR (100 MHz,  $\text{CDCl}_3$ )  $\delta$  170.4, 155.5, 143.8, 136.1, 134.5, 129.7, 128.5, 128.2, 128.1, 127.3, 126.2, 117.4, 67.1, 54.1, 52.7, 37.1, 35.6, 21.5. HRMS (ESI)  $m/z$  calcd. for  $\text{C}_{22}\text{H}_{26}\text{N}_2\text{NaO}_6\text{S}_2^+$   $[\text{M} + \text{Na}]^+$ : 501.1124, found: 501.1125.

**Ethyl N-((((9H-fluoren-9-yl)methoxy)carbonyl)glycyl)-S-((Z)-2-((N,4-dimethylphenyl)sulfonamido)vinyl)-L-cysteinyl-L-leucinate (9g)**

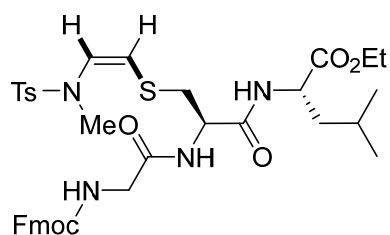

White solid, (148.5 mg, yield 90%);  $R_f = 0.2$  (PE/EA = 1:1);  $^1\text{H}$  NMR (400 MHz,  $\text{CDCl}_3$ )  $\delta$  7.75 (d,  $J = 7.5$  Hz, 2H), 7.66 (d,  $J = 8.0$  Hz, 2H), 7.59 (d,  $J = 7.5$  Hz, 2H), 7.38 (t,  $J = 7.5$  Hz, 2H), 7.30 (d,  $J = 7.8$  Hz, 4H), 7.27 (d,  $J = 2.7$  Hz, 1H), 7.24 (d,  $J = 7.6$  Hz, 1H), 7.14 (d,  $J = 8.0$  Hz, 1H), 5.99 (d,  $J = 7.1$  Hz, 1H), 5.86 (d,  $J = 7.1$  Hz, 1H), 5.80 (d,  $J = 5.8$  Hz, 1H), 4.67 (q,  $J = 6.7$  Hz, 1H), 4.51 (q,  $J = 7.4$  Hz, 1H), 4.39 (d,  $J = 7.1$  Hz, 2H), 4.26 – 4.17 (m, 2H), 4.14 (ddd,  $J = 10.8, 6.9, 3.3$  Hz, 2H), 3.95 (d,  $J = 5.6$  Hz, 2H), 3.21 (dd,  $J = 14.2, 4.8$  Hz, 1H), 2.97 (dd,  $J = 14.2, 7.1$  Hz, 1H), 2.89 (s, 3H), 2.41 (s, 3H), 1.68 (q,  $J = 6.4$  Hz, 1H), 1.64 (d,  $J = 6.9$  Hz, 2H), 1.26 (d,  $J = 7.2$  Hz, 3H), 0.89 (dd,  $J = 6.4, 2.9$  Hz, 6H);  $^{13}\text{C}$  NMR (100 MHz,  $\text{CDCl}_3$ )  $\delta$  172.3, 169.4, 169.2, 156.7, 144.1, 143.8, 141.3, 133.6, 129.8, 127.8, 127.7, 127.6, 127.1, 126.5, 125.1, 123.3, 120.0, 67.3, 61.4, 53.2, 51.5, 47.1, 44.5, 40.7, 36.5, 36.0, 24.8, 22.7, 21.8, 21.6, 14.2. HRMS (ESI)  $m/z$  calcd. for  $\text{C}_{38}\text{H}_{47}\text{N}_4\text{O}_8\text{S}_2^+$   $[\text{M} + \text{H}]^+$ : 751.2830, found: 751.2830.

**Methyl N-(((benzyloxy)carbonyl)-L-alanyl)-S-((Z)-2-((N,4-dimethylphenyl)sulfonamido)vinyl)-L-cysteinyl-L-valinate (9h)**

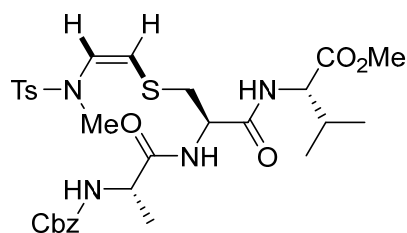

White solid, (125.7 mg, yield 97%);  $R_f = 0.2$  (PE/EA = 2:1);  $^1\text{H}$  NMR (400 MHz,  $\text{CDCl}_3$ )  $\delta$  7.67 (d,  $J = 8.0$  Hz, 2H), 7.45 (d,  $J = 8.0$  Hz, 1H), 7.35 – 7.25 (m, 10H), 5.92 (dd,  $J = 14.5, 7.4$  Hz, 2H), 5.84 (d,  $J = 7.3$  Hz, 1H), 5.16 – 5.05 (m, 2H), 4.76 (q,  $J = 6.6$  Hz,

1H), 4.47 (dd,  $J = 8.6, 5.2$  Hz, 1H), 4.43 – 4.33 (m, 1H), 3.71 (s, 3H), 3.13 (dd,  $J = 14.3, 5.6$  Hz, 1H), 2.99 (dd,  $J = 14.0, 6.7$  Hz, 1H), 2.92 (s, 3H), 2.41 (s, 3H), 2.17 (dt,  $J = 13.0, 6.7$  Hz, 1H), 1.38 (d,  $J = 7.1$  Hz, 3H), 0.91 (t,  $J = 6.3$  Hz, 6H);  $^{13}\text{C}$  NMR (100 MHz,  $\text{CDCl}_3$ )  $\delta$  172.9, 171.8, 169.7, 156.0, 144.0, 136.3, 133.9, 129.8, 128.5, 128.1, 128.0, 127.5, 126.1, 121.5, 66.9, 57.8, 53.2, 52.2, 50.7, 36.2, 36.1, 31.0, 21.5, 18.9, 18.7, 17.9. HRMS (ESI)  $m/z$  calcd. for  $\text{C}_{30}\text{H}_{40}\text{N}_4\text{NaO}_8\text{S}_2^+$   $[\text{M} + \text{Na}]^+$ : 671.2180, found: 671.2173.

**Methyl (6R,12S,Z)-6-(methoxycarbonyl)-2,2,12-trimethyl-4-oxo-11-tosyl-3-oxa-8-thia-5,11-diazatridec-9-en-13-oate (9i)**

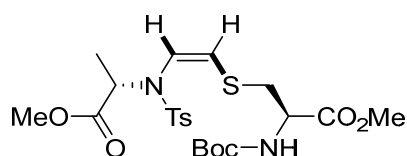

Yellow Oil, (75.3 mg, yield 73%);  $R_f = 0.2$  (PE/EA = 2:1);  $^1\text{H}$  NMR (400 MHz,  $\text{CDCl}_3$ )  $\delta$  7.69 (d,  $J = 8.1$  Hz, 2H), 7.28 (d,  $J = 10.0$  Hz, 2H), 6.33 (d,  $J = 6.5$  Hz, 1H), 5.93 (d,  $J = 6.5$  Hz, 1H), 5.56 (d,  $J = 8.1$  Hz, 1H), 4.71 (q,  $J = 7.3$  Hz, 1H), 4.59 (dt,  $J = 8.8, 4.6$  Hz, 1H), 3.75 (s, 3H), 3.47 (s, 3H), 3.23 (dd,  $J = 14.4, 4.0$  Hz, 1H), 3.14 (dd,  $J = 14.3, 5.1$  Hz, 1H), 2.42 (s, 3H), 1.46 (s, 9H), 1.40 (d,  $J = 7.4$  Hz, 3H);  $^{13}\text{C}$  NMR (100 MHz,  $\text{CDCl}_3$ )  $\delta$  171.4, 170.5, 155.0, 143.6, 136.6, 136.1, 129.3, 127.6, 120.2, 80.1, 56.5, 53.9, 52.5, 51.9, 36.5, 28.3, 28.2, 21.5, 16.5. HRMS (ESI)  $m/z$  calcd. for  $\text{C}_{22}\text{H}_{32}\text{N}_2\text{NaO}_8\text{S}_2^+$   $[\text{M} + \text{Na}]^+$ : 539.1492, found: 539.1492.

**Methyl (5R,11R,Z)-11-isobutyl-5-(methoxycarbonyl)-3-oxo-1-phenyl-10-tosyl-2-oxa-7-thia-4,10-diazadodec-8-en-12-oate (9j)**

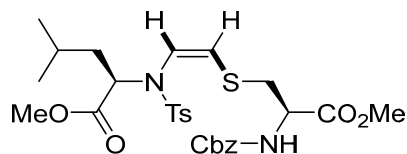

Yellow Oil, (71.0 mg, yield 60%);  $R_f = 0.2$  (PE/EA = 2:1);  $^1\text{H}$  NMR (400 MHz,  $\text{CDCl}_3$ )  $\delta$  7.64 (d,  $J = 8.0$  Hz, 2H), 7.34 (dd,  $J = 12.4, 5.0$  Hz, 5H), 7.17 (d,  $J = 8.0$  Hz, 2H), 6.26 (d,  $J = 6.7$  Hz, 1H), 6.05 (d,  $J = 8.3$  Hz, 1H), 5.91 (d,  $J = 6.6$  Hz, 1H), 5.15 (q,  $J = 12.4$  Hz, 2H), 4.71 (dt,  $J = 8.5, 4.2$  Hz, 1H), 4.58 (dd,  $J = 8.4, 6.4$  Hz, 1H), 3.76 (s, 3H), 3.37 (s, 3H), 3.32 (dd,  $J = 14.5, 3.7$  Hz, 1H), 3.15 (dd,  $J = 14.4, 4.9$  Hz, 1H), 2.38 (s, 3H), 1.83 – 1.77 (m, 1H), 1.49 (ddd,  $J = 8.1, 6.0, 4.1$  Hz, 2H), 0.92 (d,  $J = 6.6$  Hz, 6H);  $^{13}\text{C}$  NMR (100 MHz,  $\text{CDCl}_3$ )  $\delta$  171.2, 170.3, 155.8, 143.6, 136.5, 136.3, 135.7, 129.3, 128.5, 128.1, 128.1, 127.7, 120.5, 67.1, 58.9, 54.4, 52.7, 51.7, 39.8, 36.6, 24.6, 22.7,

21.6, 21.5. HRMS (ESI)  $m/z$  calcd. for  $C_{28}H_{36}N_2NaO_8S_2^+$   $[M + Na]^+$ : 615.1805, found: 615.1800.

**Methyl S-((Z)-2-((N-(2-(tert-butoxy)-2-oxoethyl)-4-methylphenyl) sulfonamido) vinyl)-N-((tert-butoxycarbonyl)-L-alanyl)-L-cysteinate (9k)**

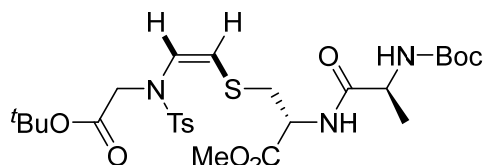

Yellow Oil, (109.5 mg, yield 89%);  $R_f$  = 0.2 (PE/EA = 1:1);  $^1H$  NMR (400 MHz,  $CDCl_3$ )  $\delta$  7.71 (d,  $J$  = 8.2 Hz, 2H), 7.34 – 7.26 (m, 2H), 7.13 (d,  $J$  = 7.6 Hz, 1H), 6.28 (d,  $J$  = 7.5 Hz, 1H), 5.65 (d,  $J$  = 7.5 Hz, 1H), 5.35 – 5.25 (m, 1H), 4.80 (dt,  $J$  = 7.7, 4.7 Hz, 1H), 4.31 (d,  $J$  = 18.1 Hz, 1H), 4.18 (d,  $J$  = 18.2 Hz, 2H), 3.73 (s, 3H), 3.15 (d,  $J$  = 4.7 Hz, 2H), 2.42 (s, 3H), 1.45 (s, 9H), 1.40 (s, 9H), 1.36 (d,  $J$  = 7.1 Hz, 3H);  $^{13}C$  NMR (100 MHz,  $CDCl_3$ )  $\delta$  172.7, 170.2, 167.5, 155.4, 143.9, 135.9, 129.6, 127.4, 125.2, 119.6, 82.3, 79.9, 52.7, 52.6, 50.1, 49.6, 36.6, 28.3, 27.9, 21.5, 18.2. HRMS (ESI)  $m/z$  calcd. for  $C_{27}H_{41}N_3NaO_9S_2^+$   $[M + Na]^+$ : 638.2176, found: 638.2176.

**Tert-butyl ((R,Z)-6-(methoxycarbonyl)-2,2-dimethyl-4-oxo-11-tosyl-3-oxa-8-thia-5,11-diazatridec-9-en-13-oyl)-L-leucinate (9l)**

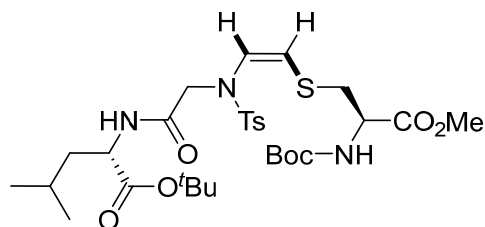

Yellow Oil, (119.6 mg, yield 89%);  $R_f$  = 0.2 (PE/EA = 1:1);  $^1H$  NMR (400 MHz,  $CDCl_3$ )  $\delta$  7.69 (d,  $J$  = 7.9 Hz, 2H), 7.33 (d,  $J$  = 8.0 Hz, 2H), 7.14 (d,  $J$  = 8.5 Hz, 1H), 6.09 (d,  $J$  = 6.9 Hz, 1H), 5.78 (d,  $J$  = 6.9 Hz, 1H), 5.72 (d,  $J$  = 7.9 Hz, 1H), 4.51 (dp,  $J$  = 17.8, 6.9, 6.1 Hz, 2H), 4.02 (d,  $J$  = 17.2 Hz, 1H), 3.74 (s, 3H), 3.17 (d,  $J$  = 5.3 Hz, 2H), 2.44 (s, 3H), 1.74 (dt,  $J$  = 13.2, 6.7 Hz, 1H), 1.61 (ddd,  $J$  = 11.4, 8.1, 5.7 Hz, 2H), 1.46 (d,  $J$  = 8.6 Hz, 18H), 0.96 (t,  $J$  = 6.8 Hz, 6H);  $^{13}C$  NMR (100 MHz,  $CDCl_3$ )  $\delta$  171.6, 170.6, 167.0, 155.1, 144.5, 134.1, 129.8, 127.8, 127.5, 124.3, 81.8, 80.1, 53.7, 52.7, 52.5, 51.4, 41.6, 36.4, 28.2, 27.9, 24.7, 22.8, 21.9, 21.5. HRMS (ESI)  $m/z$  calcd. for  $C_{30}H_{47}N_3NaO_9S_2^+$   $[M + Na]^+$ : 680.2646, found: 680.2640.

**Tert-butyl N-((Z)-2-(((R)-2-((S)-2-((tert-butoxycarbonyl)amino)propanamido)-3-methoxy-3-oxopropyl)thio)vinyl)-N-tosylglycyl-L-leucinate (9m)**

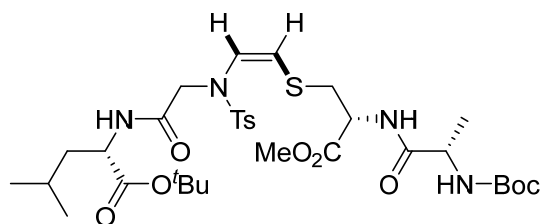

Yellow oil, (111.6 mg, yield 75%);  $R_f = 0.2$  ( $\text{CH}_3\text{OH}/\text{CH}_2\text{Cl}_2 = 50:1$ );  $^1\text{H NMR}$  (400 MHz,  $\text{CDCl}_3$ )  $\delta$  7.70 (d,  $J = 8.3$  Hz, 2H), 7.52 (d,  $J = 7.1$  Hz, 1H), 7.32 (d,  $J = 8.5$  Hz, 2H), 7.22 (d,  $J = 8.5$  Hz, 1H), 6.11 (d,  $J = 7.5$  Hz, 1H), 5.80 (d,  $J = 7.5$  Hz, 1H), 5.47 (d,  $J = 8.2$  Hz, 1H), 4.72 – 4.63 (m, 1H), 4.51 (td,  $J = 8.6, 5.5$  Hz, 1H), 4.34 – 4.24 (m, 1H), 4.08 (d,  $J = 7.8$  Hz, 2H), 3.72 (s, 3H), 3.21 (dd,  $J = 14.2, 4.5$  Hz, 1H), 3.10 (dd,  $J = 14.2, 6.1$  Hz, 1H), 2.43 (s, 3H), 1.76 – 1.69 (m, 1H), 1.63 – 1.57 (m, 2H), 1.45 (d,  $J = 9.9$  Hz, 18H), 0.95 (t,  $J = 6.4$  Hz, 6H);  $^{13}\text{C NMR}$  (100 MHz,  $\text{CDCl}_3$ )  $\delta$  173.2, 172.2, 170.1, 167.5, 155.5, 144.4, 134.6, 129.8, 127.5, 125.5, 121.3, 81.9, 79.8, 52.6, 51.5, 51.2, 49.9, 41.2, 36.0, 28.3, 27.9, 24.8, 22.8, 21.9, 21.5, 18.3. HRMS (ESI)  $m/z$  calcd. for  $\text{C}_{33}\text{H}_{52}\text{N}_4\text{NaO}_{10}\text{S}_2^+$   $[\text{M} + \text{Na}]^+$ : 751.3017, found: 751.3019.

**(S)-4-((tert-butoxycarbonyl)amino)-5-(((R)-3-(((Z)-2-((N,4-dimethylphenyl)sulfonamido)vinyl)thio)-1-methoxy-1-oxopropan-2-yl)amino)-5-oxopentanoic acid (11a)**

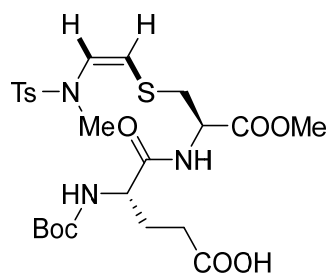

White solid, (92.8 mg, yield 82%);  $R_f = 0.2$  ( $\text{PE}/\text{EA} = 2:1$ );  $^1\text{H NMR}$  (400 MHz,  $\text{DMSO}-d_6$ )  $\delta$  8.32 (d,  $J = 7.7$  Hz, 1H), 7.65 (d,  $J = 7.9$  Hz, 2H), 7.43 (d,  $J = 7.9$  Hz, 2H), 6.96 (d,  $J = 8.2$  Hz, 1H), 6.05 (d,  $J = 7.6$  Hz, 1H), 5.89 (d,  $J = 7.6$  Hz, 1H), 4.44 (td,  $J = 8.0, 4.9$  Hz, 1H), 4.05 (td,  $J = 8.7, 5.3$  Hz, 1H), 3.61 (s, 3H), 3.14 – 2.95 (m, 2H), 2.87 (s, 3H), 2.47 – 2.41 (m, 2H), 2.02 (s, 3H), 1.85 – 1.71 (m, 2H), 1.35 (s, 9H);  $^{13}\text{C NMR}$  (100 MHz,  $\text{DMSO}-d_6$ )  $\delta$  172.4, 171.0, 155.7, 144.4, 134.1, 130.4, 127.6, 125.9, 119.4, 78.6, 53.8, 52.8, 52.6, 35.9, 35.3, 32.2, 30.0, 28.6, 21.5, 15.1. HRMS (ESI)  $m/z$  calcd. for  $\text{C}_{24}\text{H}_{37}\text{N}_3\text{NaO}_9\text{S}_2^+$   $[\text{M} + \text{Na}]^+$ : 598.1863, found: 598.1862.

**(S)-3-(((benzyloxy)carbonyl)amino)-4-(((R)-3-(((Z)-2-((N,4-dimethylphenyl)sulfonamido)vinyl)thio)-1-ethoxy-1-oxopropan-2-yl)amino)-4-oxobutanoic acid (11b)**

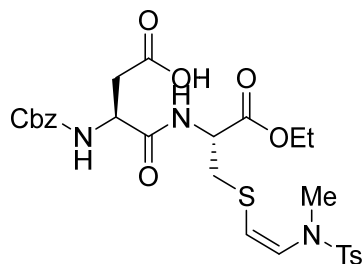

White solid, (86.3 mg, yield 73%);  $R_f = 0.2$  (PE/EA = 2:1);  $^1\text{H NMR}$  (400 MHz, DMSO- $d_6$ )  $\delta$  12.40 (s, 1H), 8.45 (d,  $J = 7.7$  Hz, 1H), 7.70 (d,  $J = 8.0$  Hz, 2H), 7.60 (d,  $J = 8.2$  Hz, 1H), 7.48 (d,  $J = 8.0$  Hz, 2H), 7.39 (m, 5H), 6.09 (d,  $J = 7.6$  Hz, 1H), 5.95 (d,  $J = 7.6$  Hz, 1H), 5.13 – 4.99 (m, 2H), 4.46 (m, 2H), 4.11 (q,  $J = 7.1$  Hz, 2H), 3.14 (dd,  $J = 14.0, 5.3$  Hz, 1H), 3.04 (dd,  $J = 14.1, 8.1$  Hz, 1H), 2.91 (s, 3H), 2.68 (dd,  $J = 16.7, 4.5$  Hz, 1H), 2.44 (s, 3H), 1.28 (s, 1H), 1.21 (t,  $J = 7.1$  Hz, 3H).  $^{13}\text{C NMR}$  (100 MHz, DMSO- $d_6$ )  $\delta$  172.0, 171.6, 170.4, 156.2, 144.4, 137.3, 134.1, 130.4, 128.8, 128.3, 128.2, 127.6, 125.7, 119.7, 66.0, 61.4, 53.2, 51.7, 36.7, 35.9, 35.1, 21.5, 14.4. HRMS (ESI)  $m/z$  calcd. for  $\text{C}_{27}\text{H}_{33}\text{N}_3\text{NaO}_9\text{S}_2^+$   $[\text{M} + \text{Na}]^+$ : 630.1550, found: 630.1546.

**Methyl N-((benzyloxy)carbonyl)-S-((Z)-2-((N,4-dimethylphenyl)sulfonamido)vinyl)-L-cysteinyl-L-histidinate (11c)**

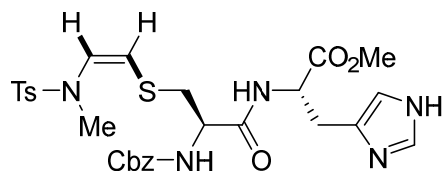

White solid, (97.2 mg, yield 79%);  $R_f = 0.2$  (PE/EA = 2:1);  $^1\text{H NMR}$  (400 MHz, DMSO- $d_6$ )  $\delta$  8.52 (d,  $J = 7.4$  Hz, 1H), 7.66 (d,  $J = 8.0$  Hz, 2H), 7.58 (d,  $J = 8.7$  Hz, 1H), 7.53 (s, 1H), 7.43 (d,  $J = 8.0$  Hz, 2H), 7.39 – 7.23 (m, 5H), 6.84 (s, 1H), 6.00 (s, 2H), 5.09 – 4.96 (m, 2H), 4.49 (q,  $J = 6.9$  Hz, 1H), 4.21 (td,  $J = 9.5, 3.9$  Hz, 1H), 3.04 (dd,  $J = 13.9, 3.9$  Hz, 1H), 2.94 (h,  $J = 6.7$  Hz, 2H), 2.83 (s, 3H), 2.81 – 2.74 (m, 1H), 2.54 (s, 1H), 2.39 (s, 3H);  $^{13}\text{C NMR}$  (100 MHz, DMSO- $d_6$ )  $\delta$  172.1, 170.6, 156.4, 144.4, 137.3, 135.4, 134.1, 130.4, 128.8, 128.2, 128.1, 127.6, 124.9, 120.6, 66.0, 55.4, 53.1, 52.3, 40.8, 36.3, 35.9, 21.5. HRMS (ESI)  $m/z$  calcd. for  $\text{C}_{28}\text{H}_{34}\text{N}_5\text{O}_7\text{S}_2^+$   $[\text{M} + \text{H}]^+$ : 616.1894, found: 616.1894.

**Methyl N-((tert-butoxycarbonyl)-L-glutaminyl)-S-((Z)-2-((N,4-dimethylphenyl)sulfonamido)vinyl)-L-cysteinate (11d)**



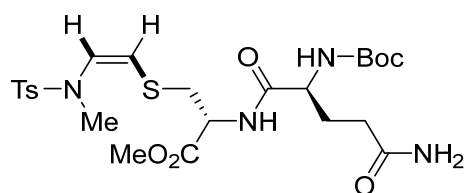

White solid, (98.4 mg, yield 86%);  $R_f$  = 0.2 (PE/EA = 2:1);  $^1\text{H NMR}$  (400 MHz,  $\text{DMSO-}d_6$ )  $\delta$  8.31 (d,  $J$  = 7.8 Hz, 1H), 7.71 – 7.66 (m, 2H), 7.47 (d,  $J$  = 8.0 Hz, 2H), 7.26 (s, 1H), 6.88 (d,  $J$  = 8.1 Hz, 1H), 6.77 (s, 1H), 6.09 (d,  $J$  = 7.6 Hz, 1H), 5.91 (d,  $J$  = 7.6 Hz, 1H), 4.48 (td,  $J$  = 7.9, 5.1 Hz, 1H), 3.96 (tt,  $J$  = 10.5, 5.1 Hz, 1H), 3.64 (s, 3H), 3.12 (dd,  $J$  = 14.0, 5.1 Hz, 1H), 3.02 (dd,  $J$  = 13.8, 7.8 Hz, 1H), 2.91 (s, 3H), 2.43 (s, 3H), 2.13 (dt,  $J$  = 8.9, 6.0 Hz, 2H), 1.39 (s, 9H);  $^{13}\text{C NMR}$  (100 MHz,  $\text{DMSO-}d_6$ )  $\delta$  174.3, 172.6, 171.0, 155.7, 144.4, 134.2, 130.4, 127.6, 125.9, 119.3, 78.6, 54.3, 52.8, 52.6, 35.9, 35.4, 31.9, 28.6, 28.2, 21.5. HRMS (ESI)  $m/z$  calcd. for  $\text{C}_{24}\text{H}_{36}\text{N}_4\text{NaO}_8\text{S}_2^+$  [ $\text{M} + \text{Na}$ ] $^+$ : 595.1867, found: 595.1862.

**Ethyl N-(((benzyloxy)carbonyl)-L-asparaginyl)-S-((Z)-2-((N,4-dimethylphenyl)sulfonamido)vinyl)-L-cysteinate (11e)**

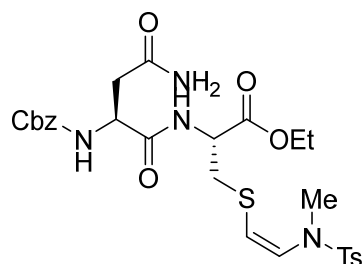

White solid, (86.2 mg, yield 71%);  $R_f$  = 0.2 (PE/EA = 2:1);  $^1\text{H NMR}$  (400 MHz,  $\text{DMSO-}d_6$ )  $\delta$  8.35 (d,  $J$  = 7.7 Hz, 1H), 7.66 (d,  $J$  = 7.9 Hz, 2H), 7.47 – 7.25 (m, 9H), 6.92 (s, 1H), 6.07 (d,  $J$  = 7.6 Hz, 1H), 5.89 (d,  $J$  = 7.6 Hz, 1H), 5.00 (d,  $J$  = 3.7 Hz, 2H), 4.42 (dd,  $J$  = 8.4, 4.9 Hz, 2H), 4.07 (q,  $J$  = 7.1 Hz, 2H), 3.13 – 2.96 (m, 2H), 2.88 (s, 3H), 2.46 (d,  $J$  = 4.5 Hz, 1H), 2.42 (s, 1H), 2.39 (s, 3H), 1.17 (t,  $J$  = 7.1 Hz, 3H).  $^{13}\text{C NMR}$  (100 MHz,  $\text{DMSO-}d_6$ )  $\delta$  172.1, 171.6, 170.4, 156.1, 144.4, 137.3, 134.1, 130.4, 128.8, 128.3, 128.2, 127.6, 125.8, 119.5, 65.9, 61.4, 53.2, 51.9, 37.7, 35.9, 35.3, 21.5, 14.4. HRMS (ESI)  $m/z$  calcd. for  $\text{C}_{27}\text{H}_{34}\text{N}_4\text{NaO}_8\text{S}_2^+$  [ $\text{M} + \text{Na}$ ] $^+$ : 629.1710, found: 629.1706.

**Ethyl N-(((benzyloxy)carbonyl)-L-seryl)-S-((Z)-2-((N,4-dimethylphenyl)sulfonamido)vinyl)-L-cysteinate (11f)**

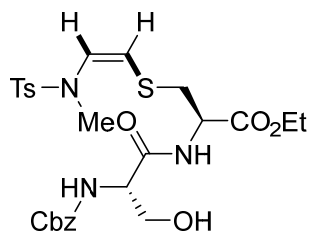

White solid, (90.3 mg, yield 78%);  $R_f = 0.2$  (PE/EA =2:1);  $^1\text{H NMR}$  (400 MHz,  $\text{CDCl}_3$ )  $\delta$  7.66 (d,  $J = 8.0$  Hz, 2H), 7.41 (d,  $J = 7.8$  Hz, 1H), 7.37 – 7.27 (m, 7H), 6.03 (d,  $J = 7.5$  Hz, 1H), 5.94 (d,  $J = 7.6$  Hz, 1H), 5.63 (d,  $J = 7.5$  Hz, 1H), 5.12 (d,  $J = 2.5$  Hz, 2H), 4.80 (dt,  $J = 8.0, 5.0$  Hz, 1H), 4.34 (d,  $J = 8.9$  Hz, 1H), 4.19 (q,  $J = 7.1$  Hz, 2H), 4.03 (dt,  $J = 10.0, 4.5$  Hz, 1H), 3.72 (dt,  $J = 11.9, 6.4$  Hz, 1H), 3.28 (t,  $J = 6.3$  Hz, 1H), 3.13 (t,  $J = 4.7$  Hz, 2H), 2.95 (s, 3H), 2.41 (s, 3H), 1.26 (t,  $J = 7.1$  Hz, 3H);  $^{13}\text{C NMR}$  (100 MHz,  $\text{CDCl}_3$ )  $\delta$  170.7, 169.9, 156.4, 144.0, 136.1, 134.1, 129.8, 128.5, 128.2, 128.0, 127.4, 126.4, 119.1, 67.2, 62.9, 62.2, 55.8, 52.8, 36.3, 35.9, 21.5, 14.1. HRMS (ESI)  $m/z$  calcd. for  $\text{C}_{26}\text{H}_{33}\text{N}_3\text{NaO}_8\text{S}_2^+$   $[\text{M} + \text{Na}]^+$ : 602.1601, found: 602.1599.

**Tert-butyl N-(((benzyloxy)carbonyl)-L-threonyl)-S-((Z)-2-((N,4-dimethylphenyl) sulfonamido)vinyl)-L-cysteinate (11g)**

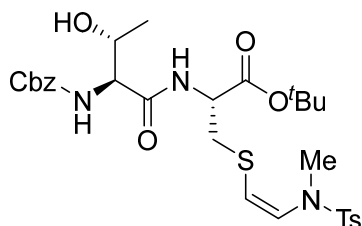

White solid, (93.3 mg, yield 75%);  $R_f = 0.2$  (PE/EA =2:1);  $^1\text{H NMR}$  (400 MHz, Chloroform-*d*)  $\delta$  7.67 (d,  $J = 7.9$  Hz, 2H), 7.39 (s, 1H), 7.36 – 7.28 (m, 7H), 6.04 (d,  $J = 7.4$  Hz, 1H), 5.91 (t,  $J = 7.1$  Hz, 1H), 5.67 (d,  $J = 7.5$  Hz, 1H), 5.12 (s, 2H), 4.72 (dt,  $J = 7.6, 4.9$  Hz, 1H), 4.34 (d,  $J = 6.7$  Hz, 1H), 4.24 (m, 1H), 3.39 (d,  $J = 29.2$  Hz, 1H), 3.10 (dd,  $J = 7.3, 4.7$  Hz, 2H), 2.96 (s, 3H), 2.41 (s, 3H), 1.46 (s, 9H), 1.18 (d,  $J = 6.4$  Hz, 3H).  $^{13}\text{C NMR}$  (100 MHz,  $\text{CDCl}_3$ )  $\delta$  170.5, 168.7, 156.7, 143.9, 136.2, 134.3, 129.8, 128.5, 128.2, 128.0, 127.4, 126.0, 119.6, 83.3, 67.2, 59.0, 53.4, 48.9, 36.6, 35.9, 27.9, 21.5, 18.4. HRMS (ESI)  $m/z$  calcd. for  $\text{C}_{29}\text{H}_{39}\text{N}_3\text{NaO}_8\text{S}_2^+$   $[\text{M} + \text{Na}]^+$ : 644.2071, found: 644.2075.

**Ethyl N-(((benzyloxy)carbonyl)-S-((Z)-2-((N,4-dimethylphenyl) sulfonamido) vinyl)-L-cysteinyl-L-tyrosinate (11h)**

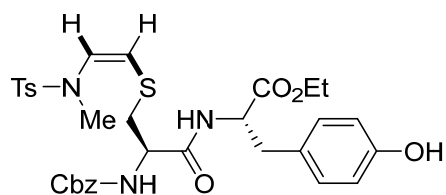

White solid, (107.4 mg, yield 82%);  $R_f = 0.2$  (PE/EA =2:1);  $^1\text{H NMR}$  (400 MHz, DMSO- $d_6$ )  $\delta$  9.29 (s, 1H), 8.38 (d,  $J = 7.5$  Hz, 1H), 7.67 (d,  $J = 7.9$  Hz, 2H), 7.49 (d,  $J = 8.8$  Hz, 1H), 7.43 (d,  $J = 8.0$  Hz, 2H), 7.37 – 7.30 (m, 5H), 6.99 (d,  $J = 8.1$  Hz, 2H), 6.68 (d,  $J = 8.0$  Hz, 2H), 6.00 (s, 2H), 5.02 (q,  $J = 12.5$  Hz, 2H), 4.42 (q,  $J = 7.3$  Hz, 1H), 4.23 (td,  $J = 9.6, 4.1$  Hz, 1H), 3.58 (s, 3H), 3.00 (dd,  $J = 13.8, 4.0$  Hz, 1H), 2.96 – 2.87 (m, 2H), 2.85 (s, 3H), 2.82 – 2.74 (m, 1H), 2.39 (s, 3H);  $^{13}\text{C NMR}$  (100 MHz, DMSO- $d_6$ )  $\delta$  172.2, 170.6, 156.5, 156.3, 144.4, 137.3, 134.2, 130.5, 130.4, 128.8, 128.3, 128.1, 127.6, 127.3, 124.9, 120.5, 115.6, 66.0, 60.2, 55.3, 54.5, 52.3, 36.3, 35.9, 21.5. HRMS (ESI)  $m/z$  calcd. for  $\text{C}_{32}\text{H}_{38}\text{N}_3\text{O}_8\text{S}_2^+$   $[\text{M} + \text{H}]^+$ : 656.2095, found: 656.2094.

**Methyl N-((tert-butoxycarbonyl)-L-methionyl)-S-((Z)-2-((N,4-dimethylphenyl)sulfonamido)vinyl)-L-cysteinate (11i)**

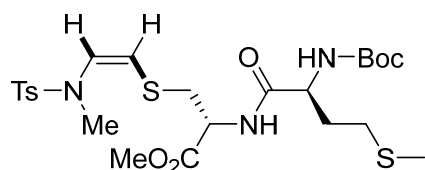

White solid, (105.8 mg, yield 92%);  $R_f = 0.2$  (PE/EA =2:1);  $^1\text{H NMR}$  (400 MHz, DMSO- $d_6$ )  $\delta$  8.25 (d,  $J = 7.7$  Hz, 1H), 7.64 – 7.59 (m, 2H), 7.40 (d,  $J = 8.1$  Hz, 2H), 6.90 (d,  $J = 8.2$  Hz, 1H), 6.02 (d,  $J = 7.6$  Hz, 1H), 5.84 (d,  $J = 7.7$  Hz, 1H), 4.40 (td,  $J = 8.0, 4.9$  Hz, 1H), 4.01 (td,  $J = 8.4, 5.0$  Hz, 1H), 3.57 (s, 3H), 3.06 (dd,  $J = 14.0, 5.0$  Hz, 1H), 2.95 (dd,  $J = 14.1, 8.3$  Hz, 1H), 2.84 (s, 3H), 2.40 (t,  $J = 7.7$  Hz, 2H), 2.36 (s, 3H), 1.98 (s, 3H), 1.75 (ddd,  $J = 29.5, 13.7, 7.1$  Hz, 2H), 1.32 (s, 9H);  $^{13}\text{C NMR}$  (100 MHz, DMSO- $d_6$ )  $\delta$  172.4, 171.0, 155.7, 144.4, 134.2, 130.4, 127.6, 125.9, 119.3, 78.6, 53.8, 52.8, 52.6, 35.9, 35.3, 32.2, 30.1, 28.6, 21.5, 15.1. HRMS (ESI)  $m/z$  calcd. for  $\text{C}_{24}\text{H}_{37}\text{N}_3\text{NaO}_7\text{S}_3^+$   $[\text{M} + \text{Na}]^+$ : 598.1686, found: 598.1680.

**Methyl N-(((benzyloxy)carbonyl)-L-lysyl)-S-((Z)-2-((N,4-dimethylphenyl)sulfonamido)vinyl)-L-cysteinate (11j)**

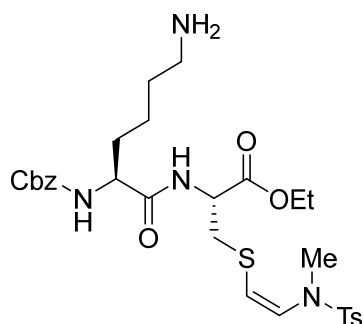

White solid, (90.6 mg, yield 73%);  $R_f = 0.2$  (DCM/MeOH = 5:1);  $^1\text{H NMR}$  (400 MHz, DMSO- $d_6$ )  $\delta$  8.45 (d,  $J = 7.7$  Hz, 1H), 7.63 (d,  $J = 8.1$  Hz, 2H), 7.41 (d,  $J = 8.1$  Hz, 2H), 7.33 (m, 5H), 6.03 (d,  $J = 7.8$  Hz, 1H), 5.90 (d,  $J = 7.6$  Hz, 1H), 4.99 (m,  $J = 12.8, 7.3$  Hz, 2H), 4.39 (m,  $J = 7.2$  Hz, 1H), 4.14 – 3.91 (m, 4H), 3.08 – 2.91 (m, 2H), 2.84 (s, 3H), 2.37 (s, 3H), 1.62 – 1.55 (m, 1H), 1.52 – 1.45 (m, 1H), 1.35 – 1.19 (m, 6H), 1.14 (t,  $J = 7.0$  Hz, 4H).  $^{13}\text{C NMR}$  (100 MHz, DMSO- $D_6$ )  $\delta$  172.3, 170.2, 155.9, 144.0, 137.0, 133.6, 130.0, 128.4, 127.8, 127.7, 127.2, 125.3, 119.3, 65.4, 60.9, 54.5, 52.6, 40.9, 35.5, 34.8, 31.9, 31.8, 22.7, 21.1, 14.0. HRMS (ESI)  $m/z$  calcd. for  $\text{C}_{29}\text{H}_{41}\text{N}_4\text{O}_7\text{S}_2^+$   $[\text{M} + \text{H}]^+$ : 621.2411, found: 621.2408.

**Ethyl N-(((benzyloxy)carbonyl)-L-tryptophyl)-S-((Z)-2-((N,4-dimethylphenyl)sulfonamido)vinyl)-L-cysteinate (11k)**

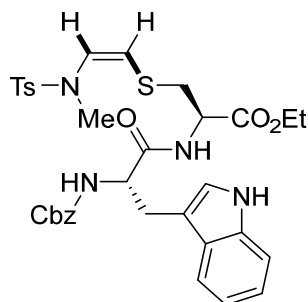

White solid, (118.0 mg, yield 87%);  $R_f = 0.2$  (PE/EA = 2:1);  $^1\text{H NMR}$  (400 MHz,  $\text{CDCl}_3$ )  $\delta$  8.71 – 8.64 (m, 1H), 7.63 (d,  $J = 8.0$  Hz, 3H), 7.29 (h,  $J = 7.9$  Hz, 9H), 7.13 (t,  $J = 7.5$  Hz, 1H), 7.11 – 7.02 (m, 2H), 6.75 (d,  $J = 7.5$  Hz, 1H), 5.69 (d,  $J = 7.3$  Hz, 1H), 5.59 (d,  $J = 7.8$  Hz, 1H), 5.38 (d,  $J = 7.4$  Hz, 1H), 5.16 – 5.04 (m, 2H), 4.70 (dt,  $J = 8.2, 4.6$  Hz, 1H), 4.59 (d,  $J = 6.6$  Hz, 1H), 4.10 (qq,  $J = 6.8, 3.7$  Hz, 2H), 3.17 (dd,  $J = 14.6, 7.0$  Hz, 1H), 3.04 – 2.93 (m, 2H), 2.82 (s, 3H), 2.39 (s, 3H), 1.21 (t,  $J = 7.1$  Hz, 3H);  $^{13}\text{C NMR}$  (100 MHz,  $\text{CDCl}_3$ )  $\delta$  171.4, 169.5, 156.0, 144.0, 136.4, 136.3, 133.9, 129.8, 128.5, 128.1, 128.0, 127.5, 125.6, 123.9, 122.1, 121.4, 119.6, 118.7, 111.5, 109.8, 67.0, 62.0, 55.6, 52.8, 36.4, 36.0, 21.6, 14.1. HRMS (ESI)  $m/z$  calcd. for  $\text{C}_{34}\text{H}_{38}\text{N}_4\text{NaO}_7\text{S}_2^+$   $[\text{M} + \text{Na}]^+$ : 701.2074, found: 701.2070.

## 5. NOESY 2-D NMR analysis of **6i**

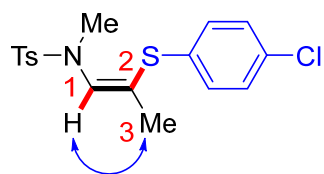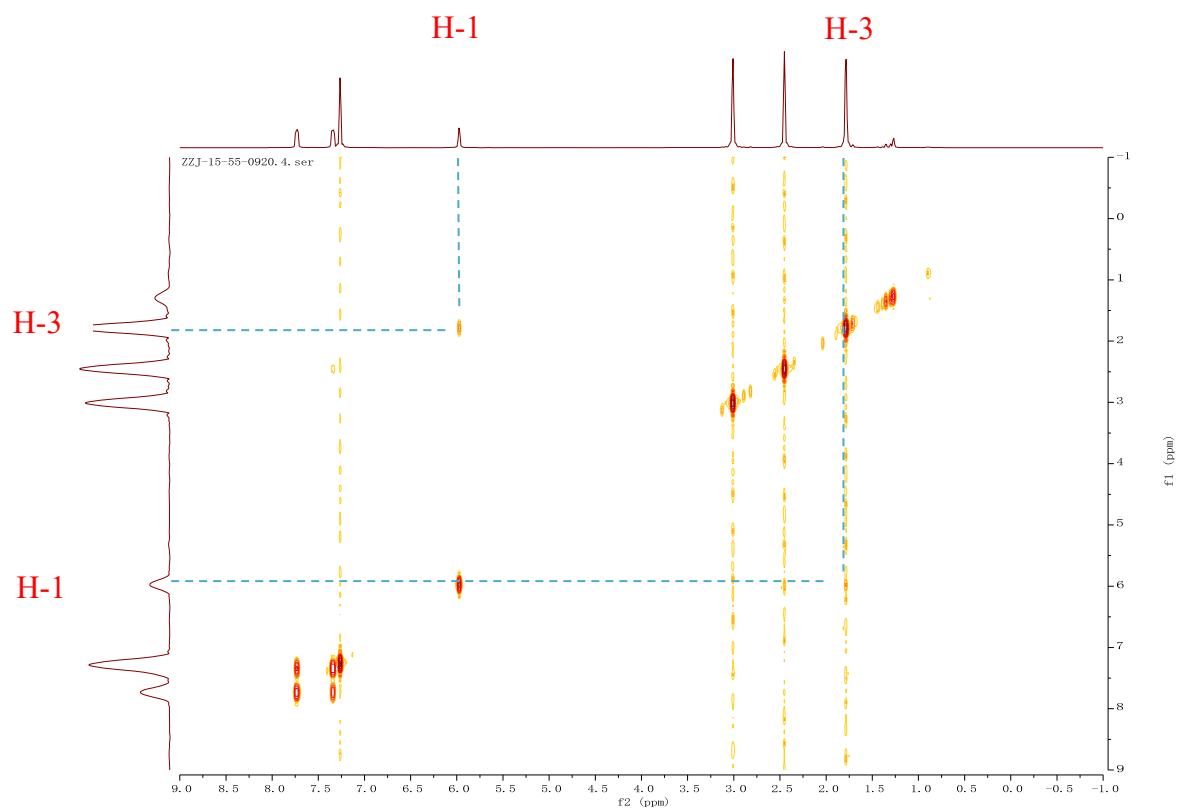

NOESY of **6i**, CDCl<sub>3</sub>

## 6. X-ray structure for compound **6i** and **6l**

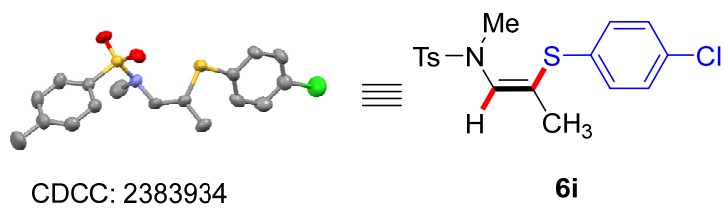

X-Ray crystal structure of **6i**

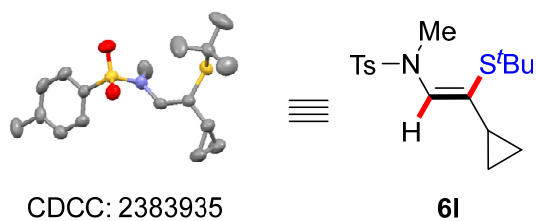

X-Ray crystal structure of **6l**

## 7. Copies of $^1\text{H}$ -NMR & $^{13}\text{C}$ -NMR Spectrum

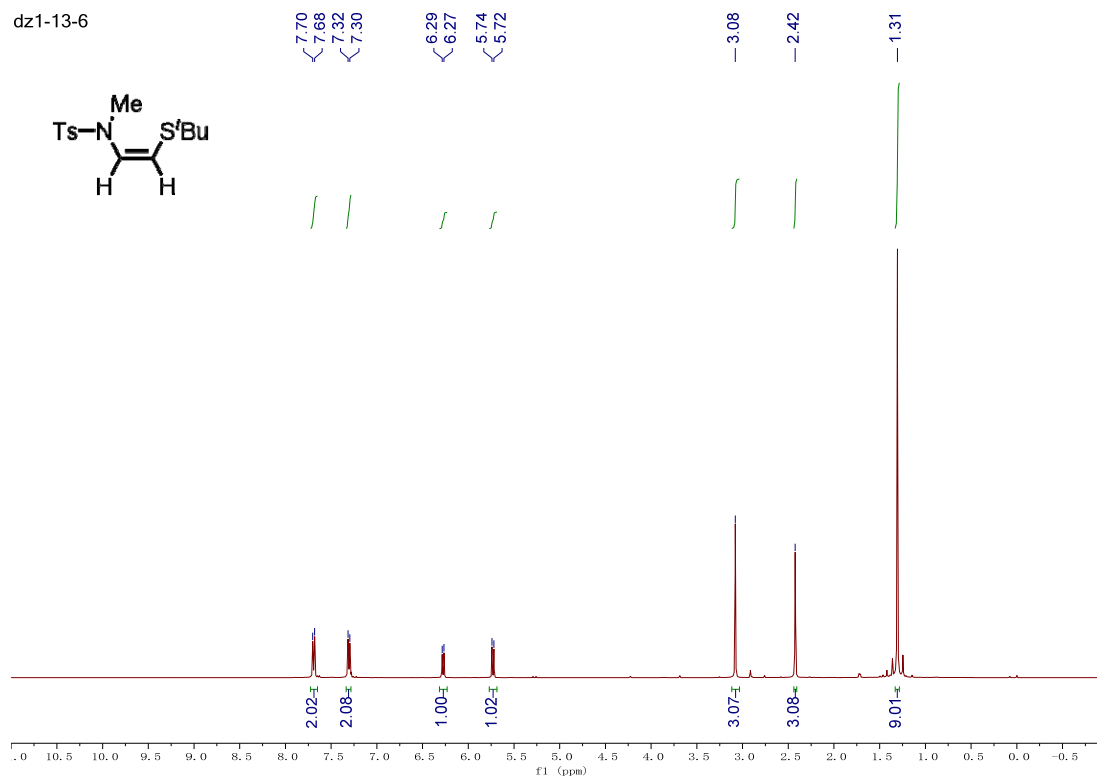

$^1\text{H}$  NMR of **3a**

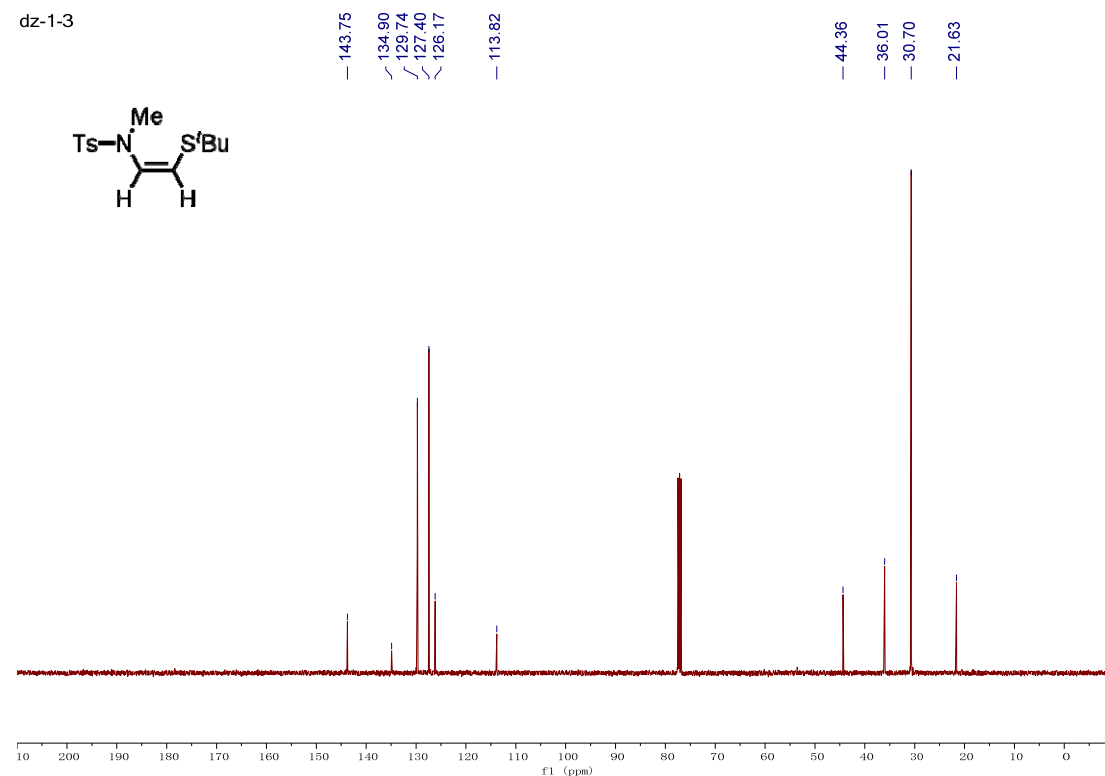

$^{13}\text{C}$  NMR of **3a**

dz-2-86-2.1.fid

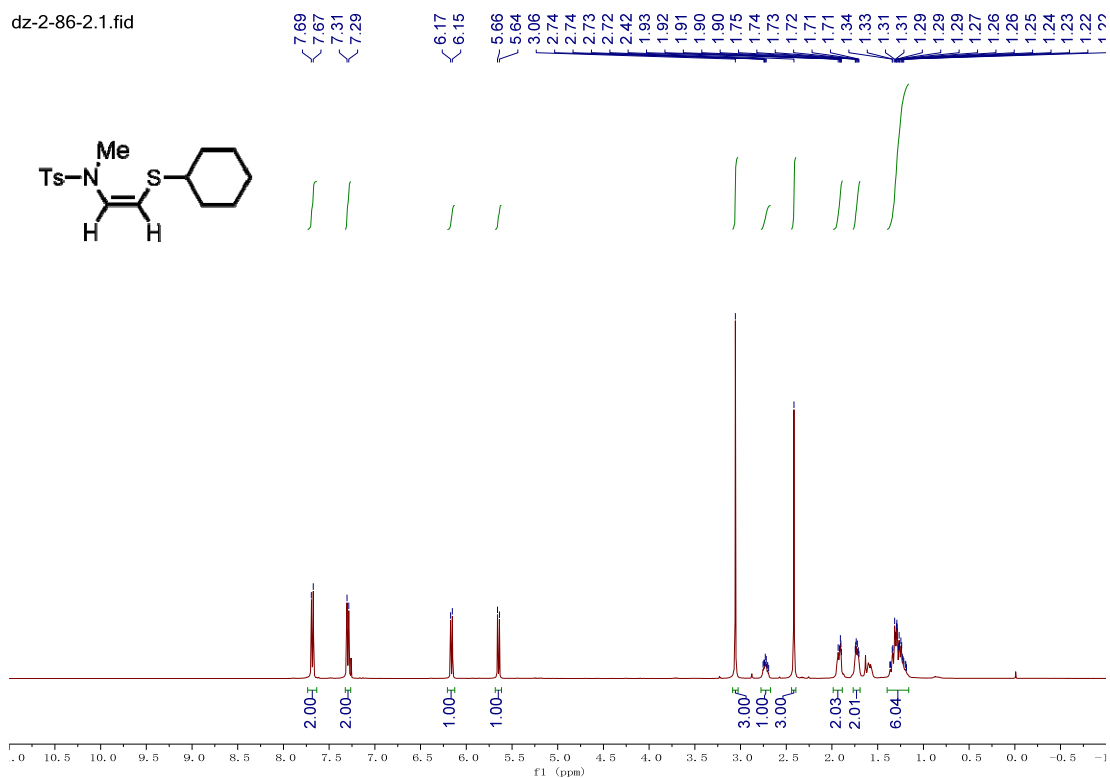

### <sup>1</sup>H NMR of **3b**

dz-2-86-2.2.fid

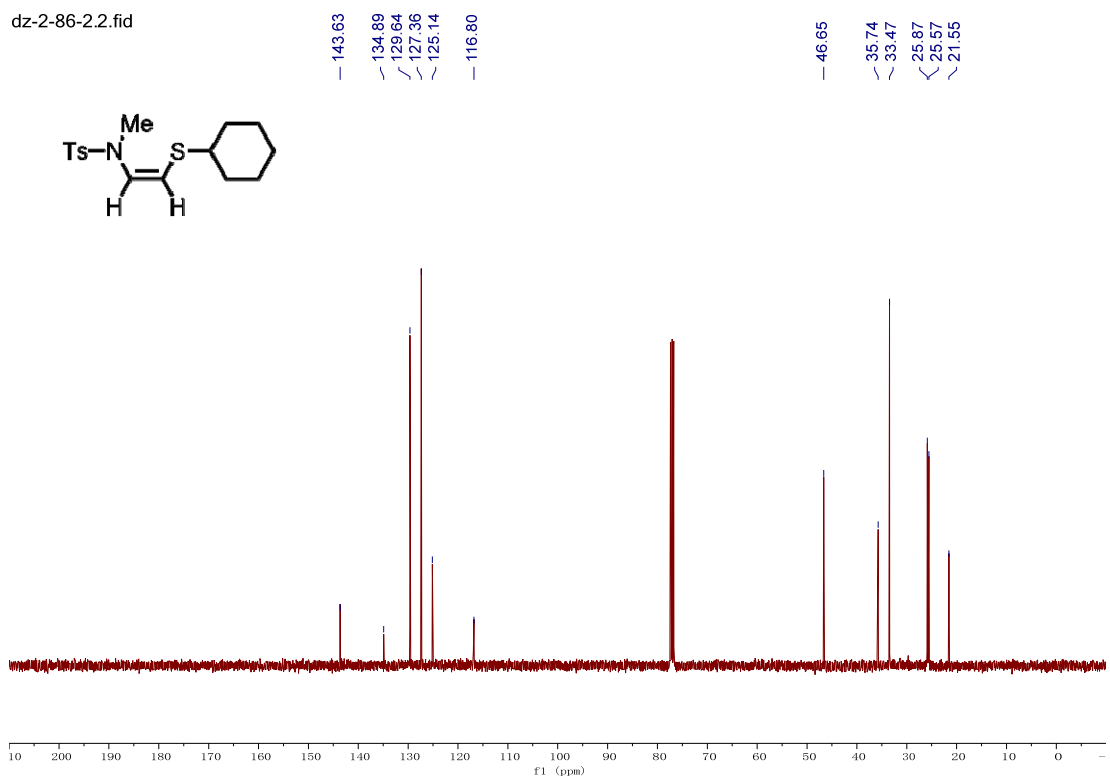

### <sup>13</sup>C NMR of **3b**



dz-2-68-1

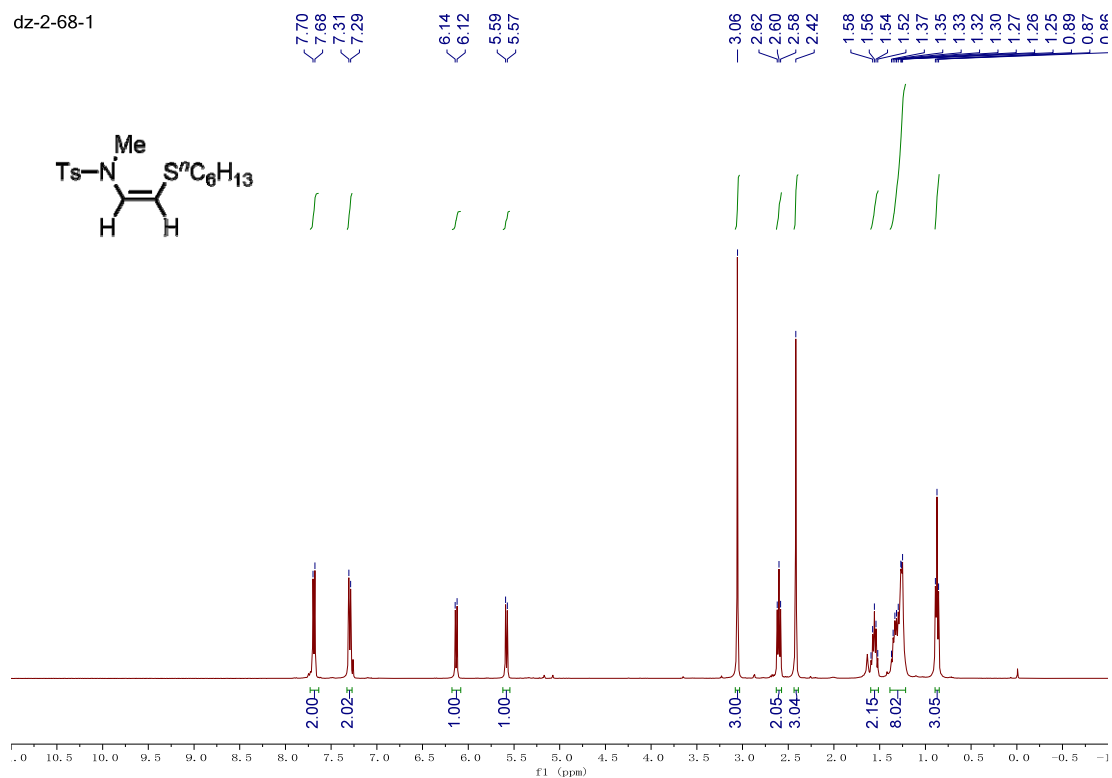

$^1\text{H}$  NMR of **3c**

dz-2-68-1

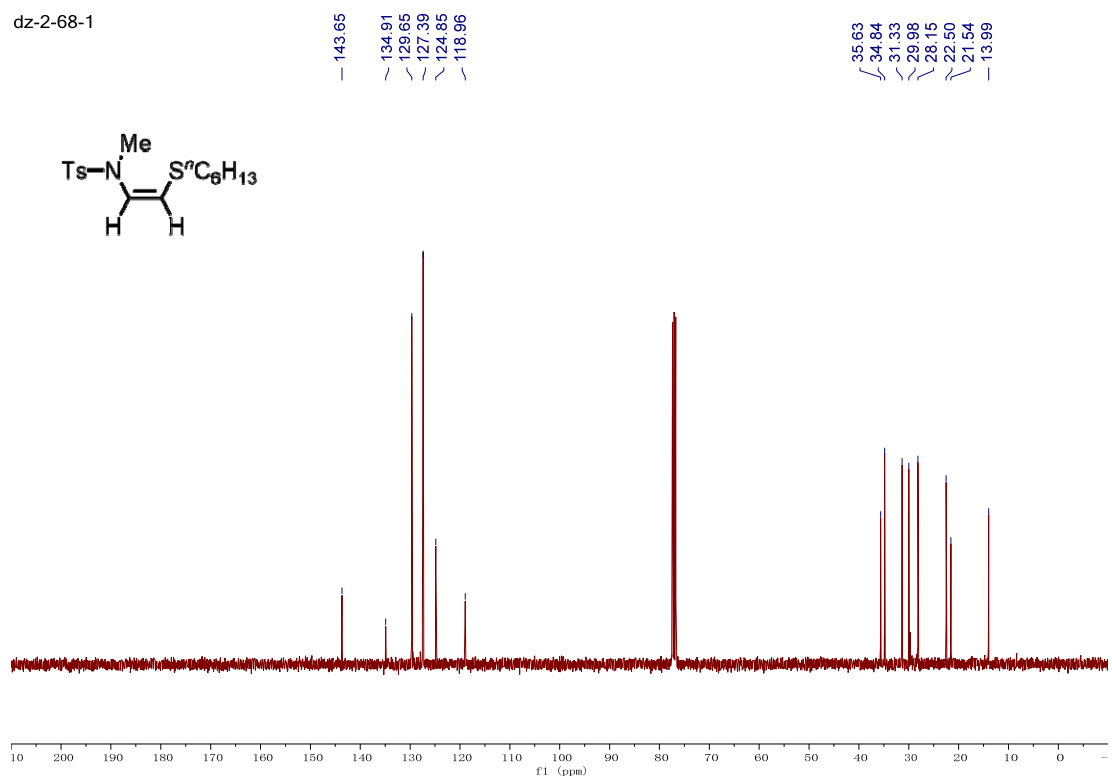

$^{13}\text{C}$  NMR of **3c**

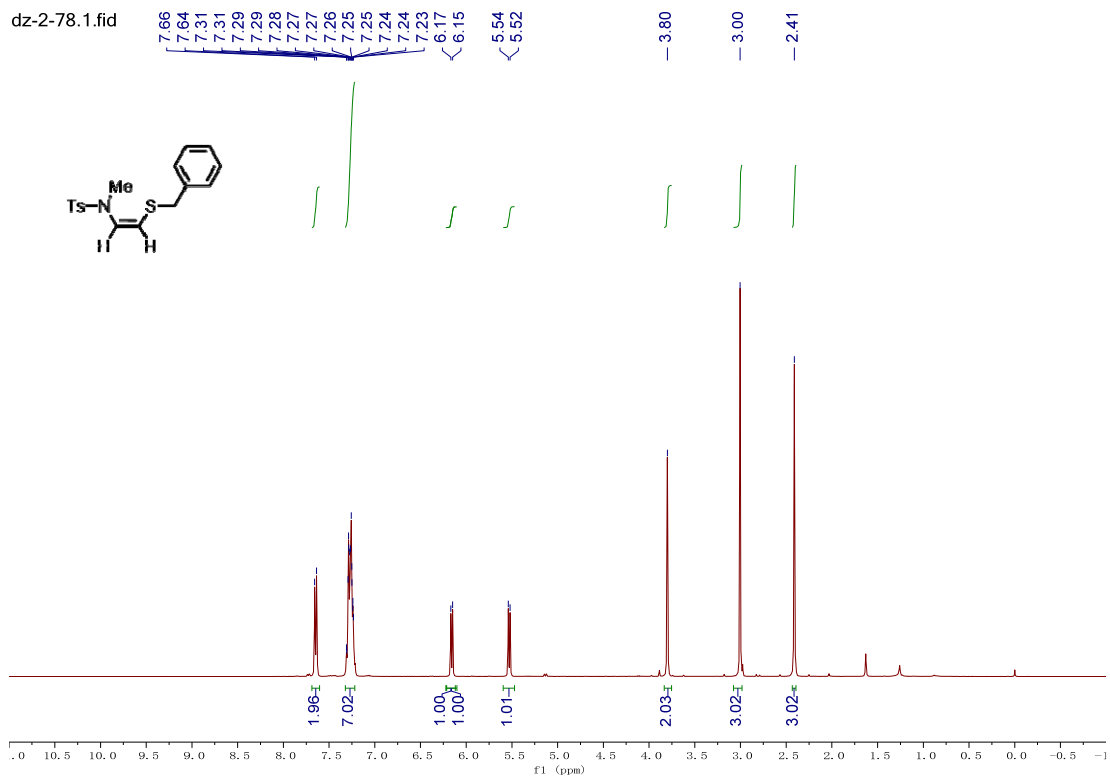

<sup>1</sup>H NMR of 3d

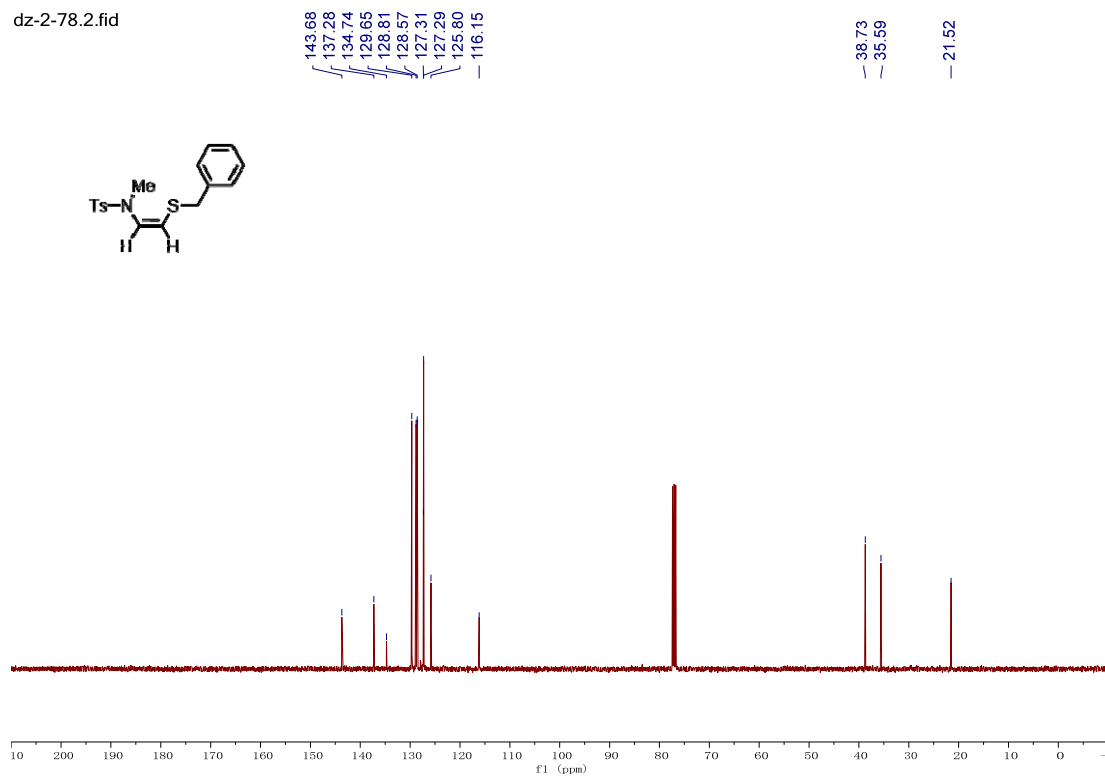

<sup>13</sup>C NMR of 3d

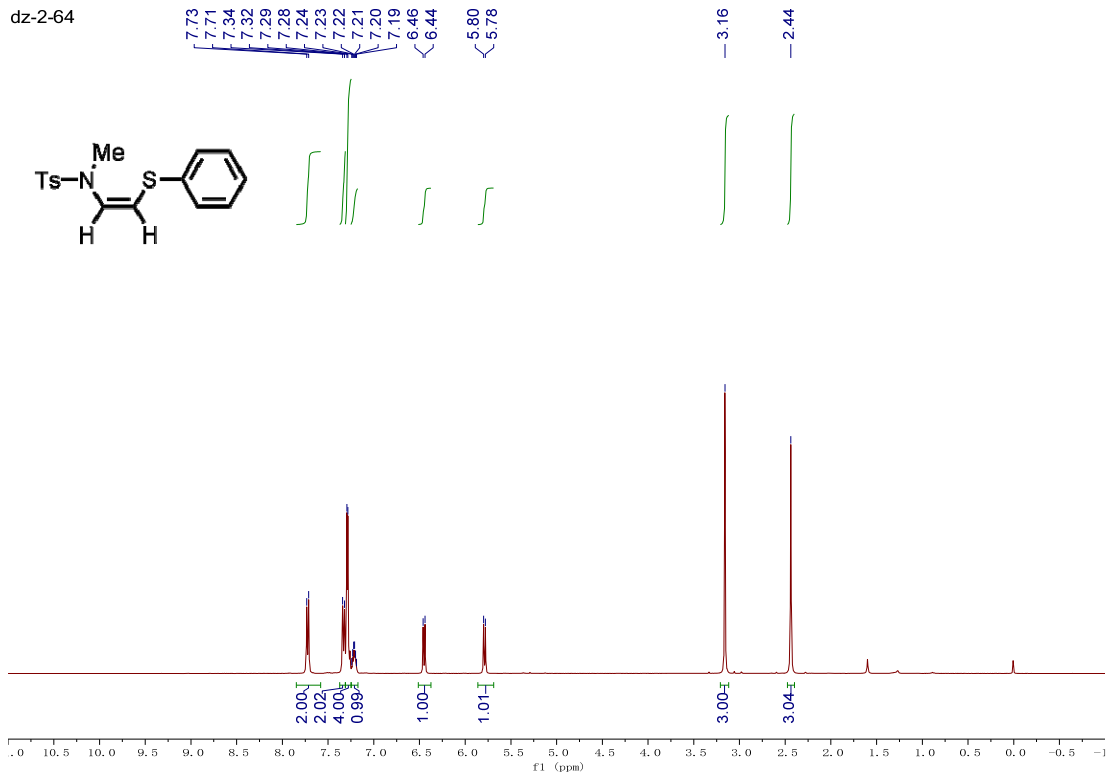

$^1\text{H}$  NMR of **3e**

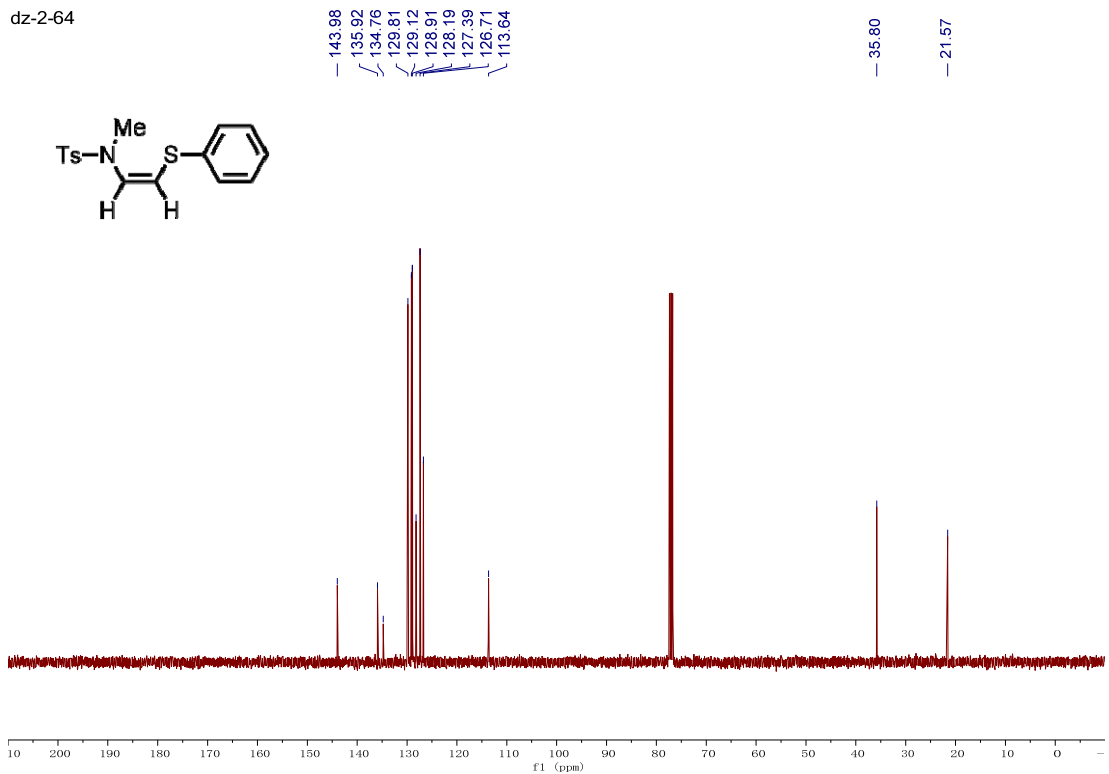

$^{13}\text{C}$  NMR of **3e**

dz-3-20-3.1.fid

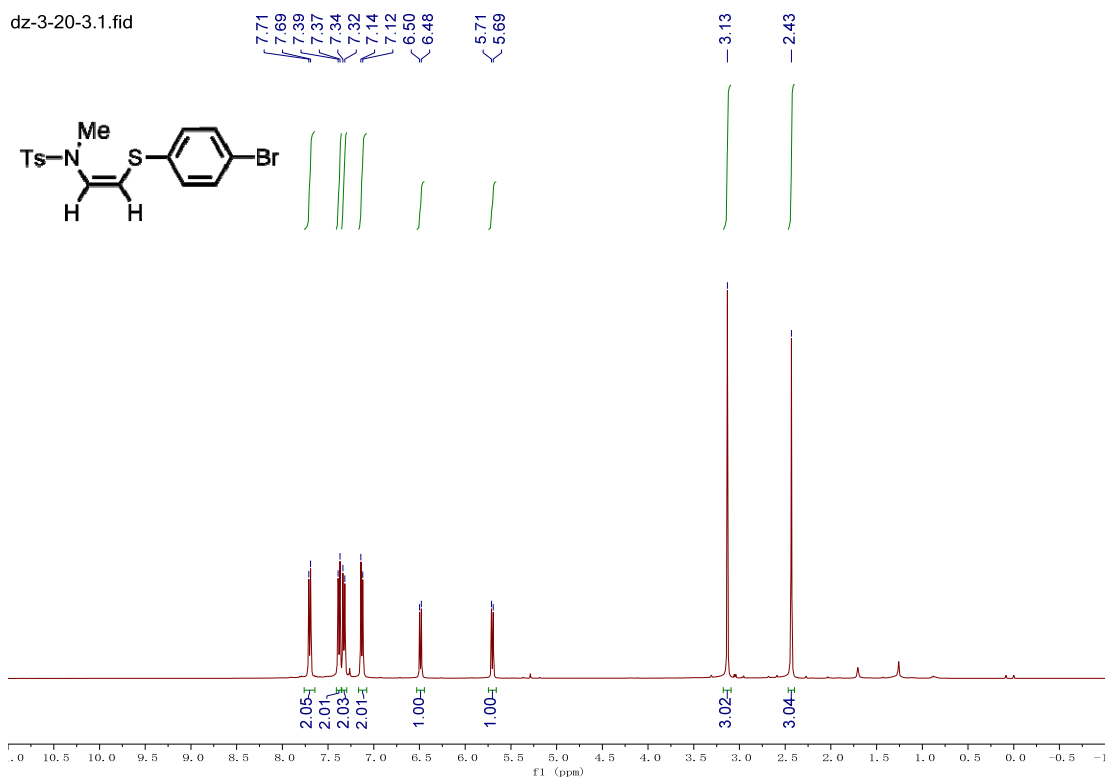

<sup>1</sup>H NMR of **3f**

dz-3-20-3.2.fid

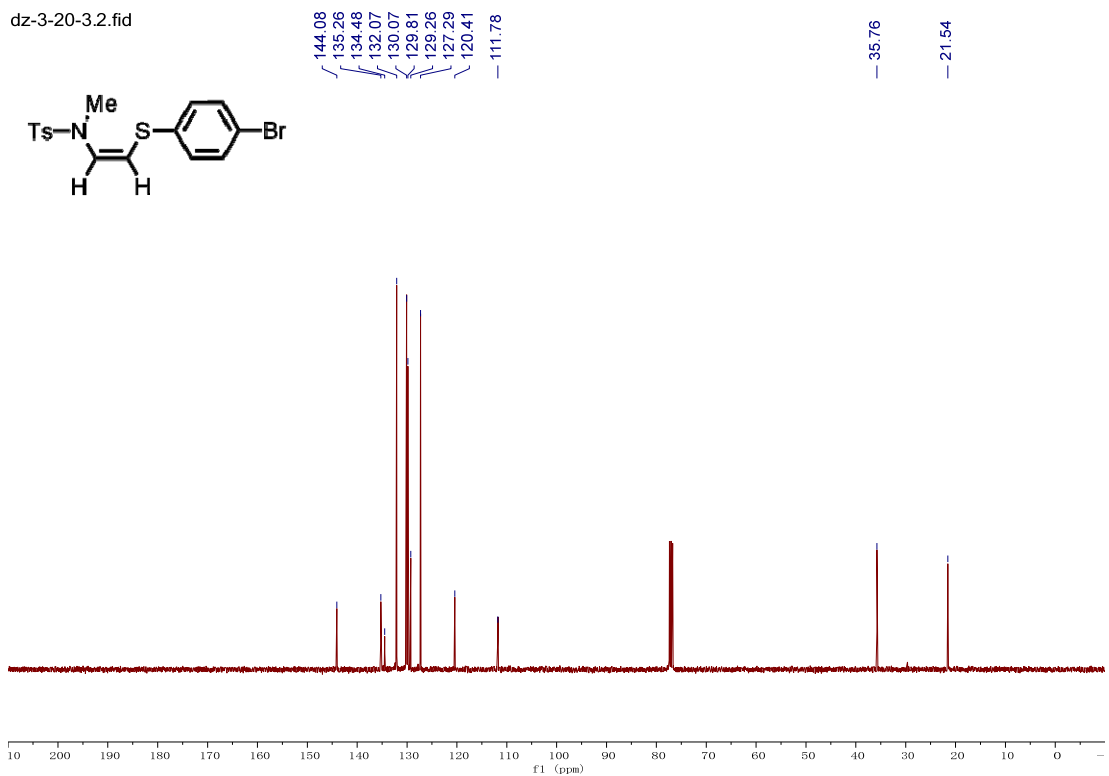

<sup>13</sup>C NMR of **3f**

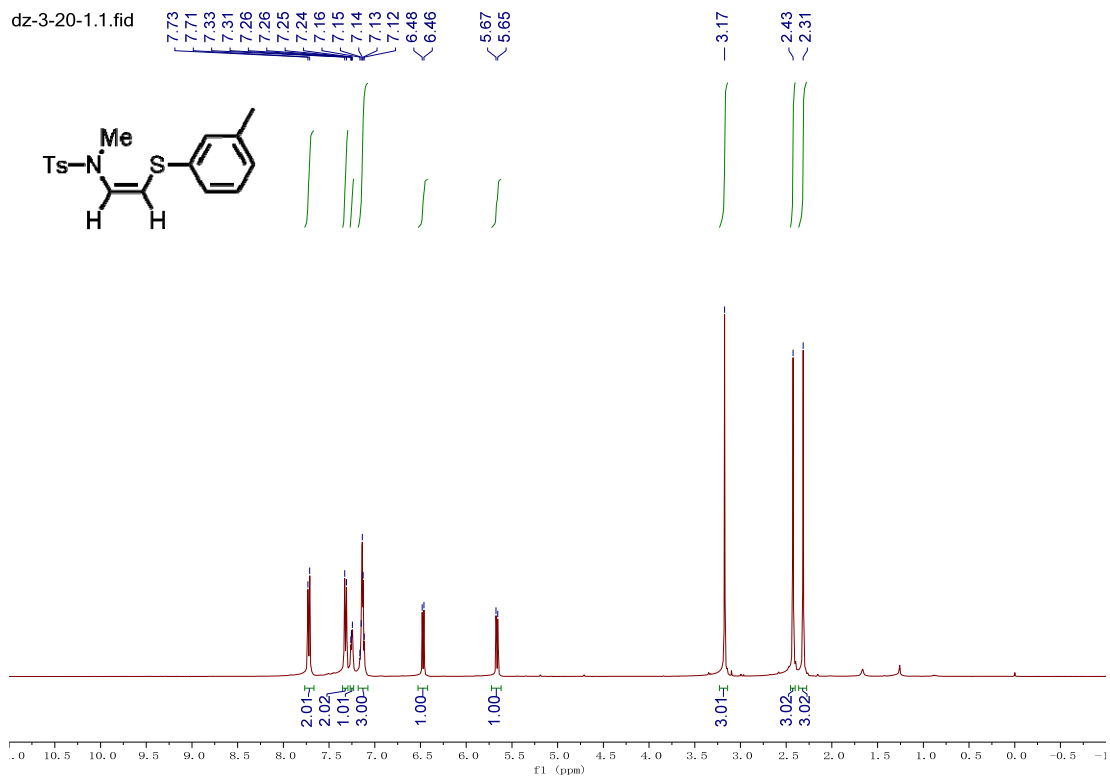

<sup>1</sup>H NMR of **3g**

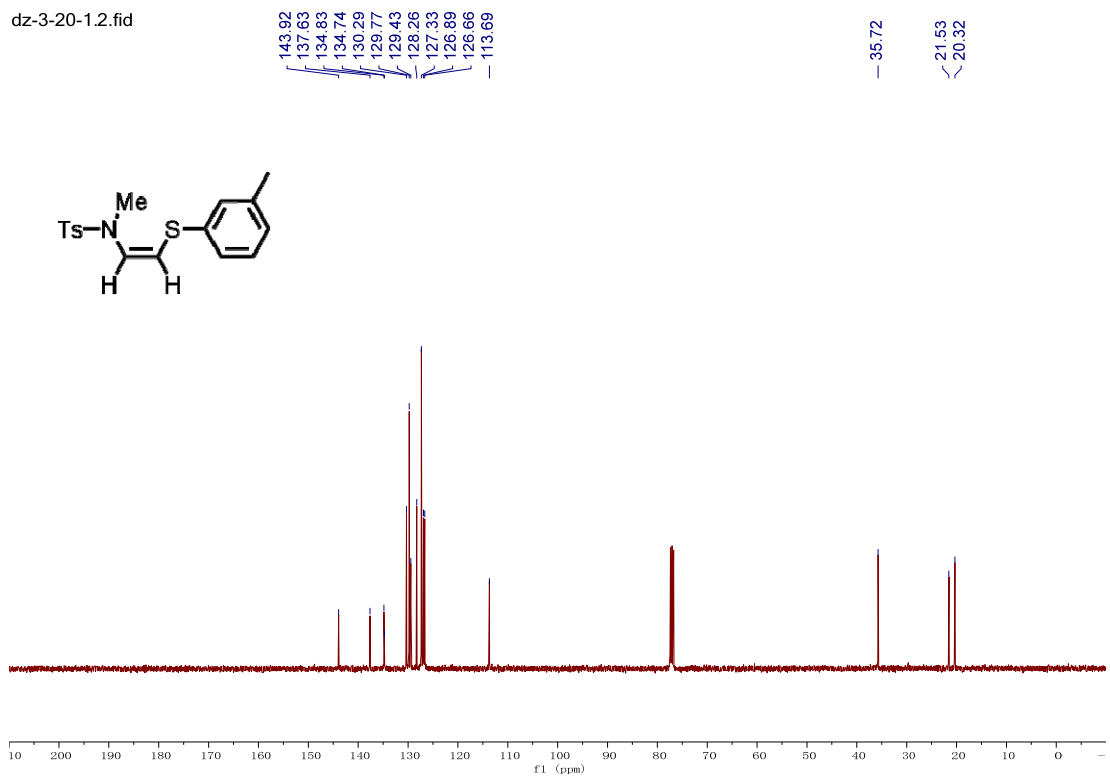

<sup>13</sup>C NMR of **3g**

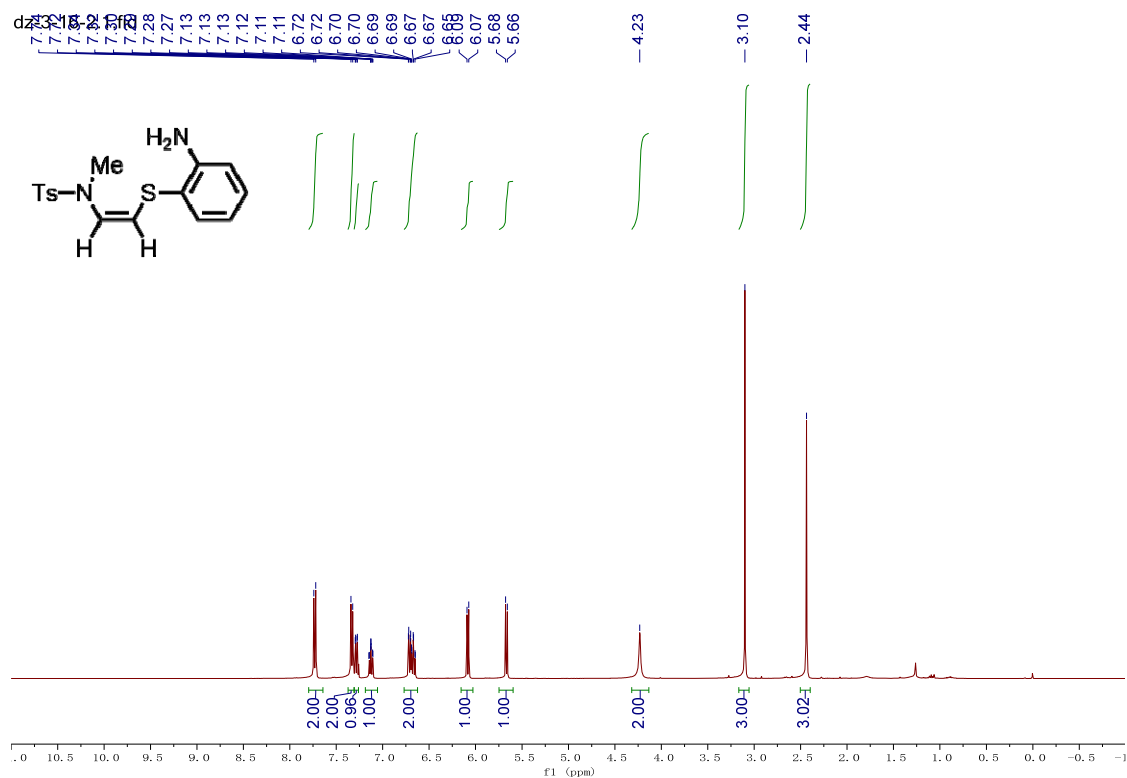

<sup>1</sup>H NMR of **3h**

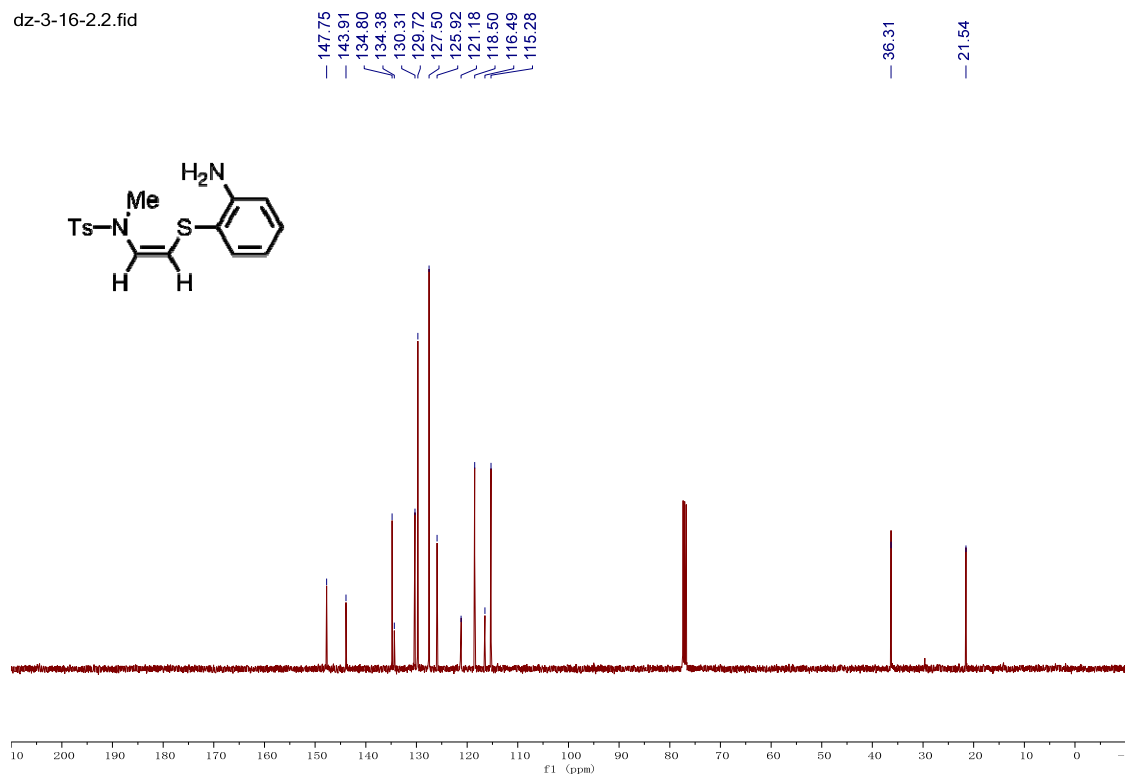

<sup>13</sup>C NMR of **3h**

dz-3-15-2.1.fid

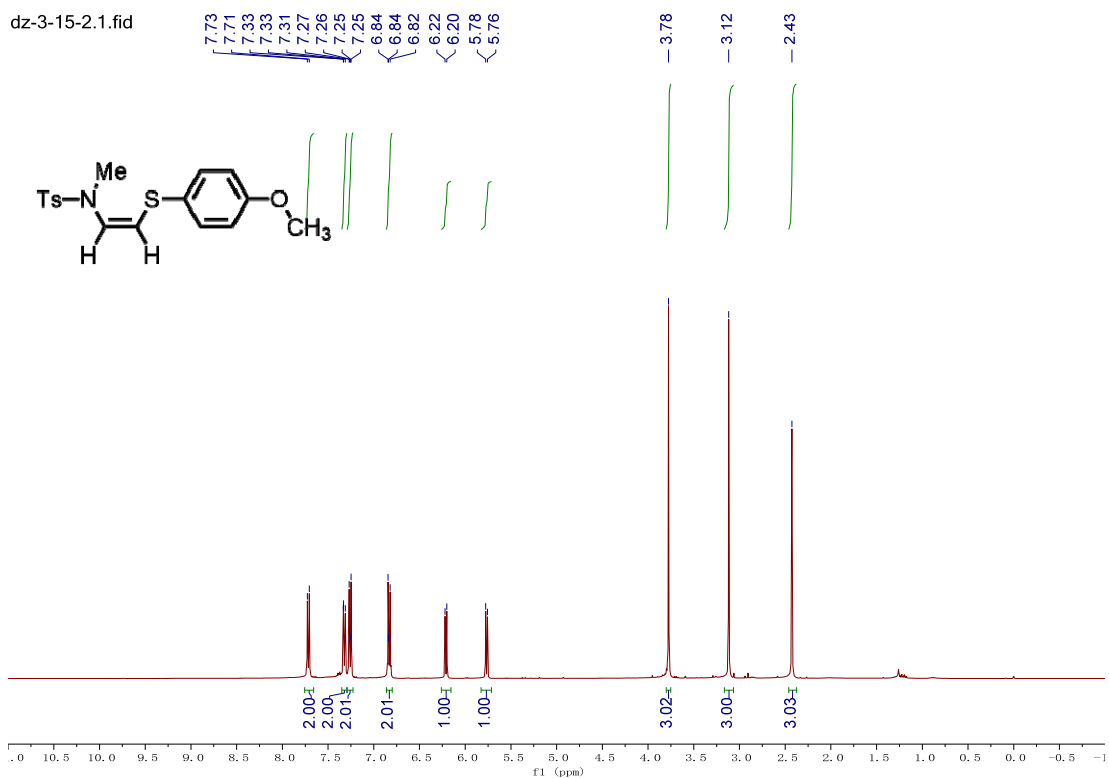

<sup>1</sup>H NMR of **3i**

dz-3-15-2.2.fid

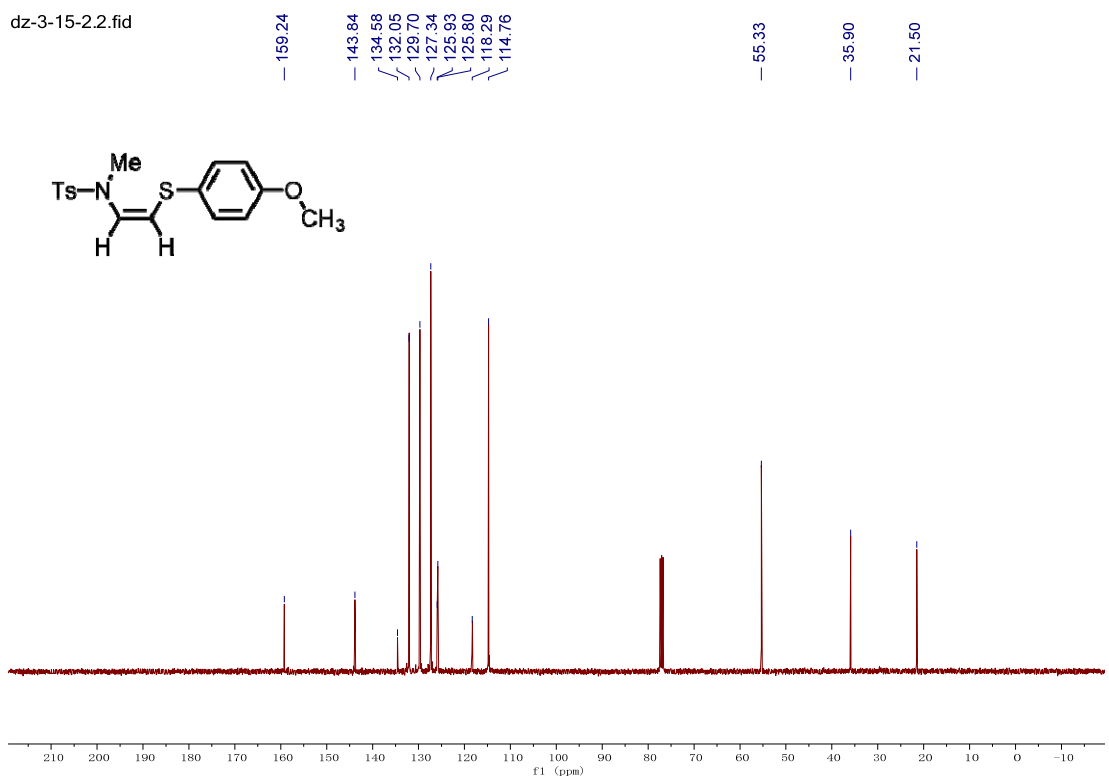

<sup>13</sup>C NMR of **3i**

dz-89-2.1.fid

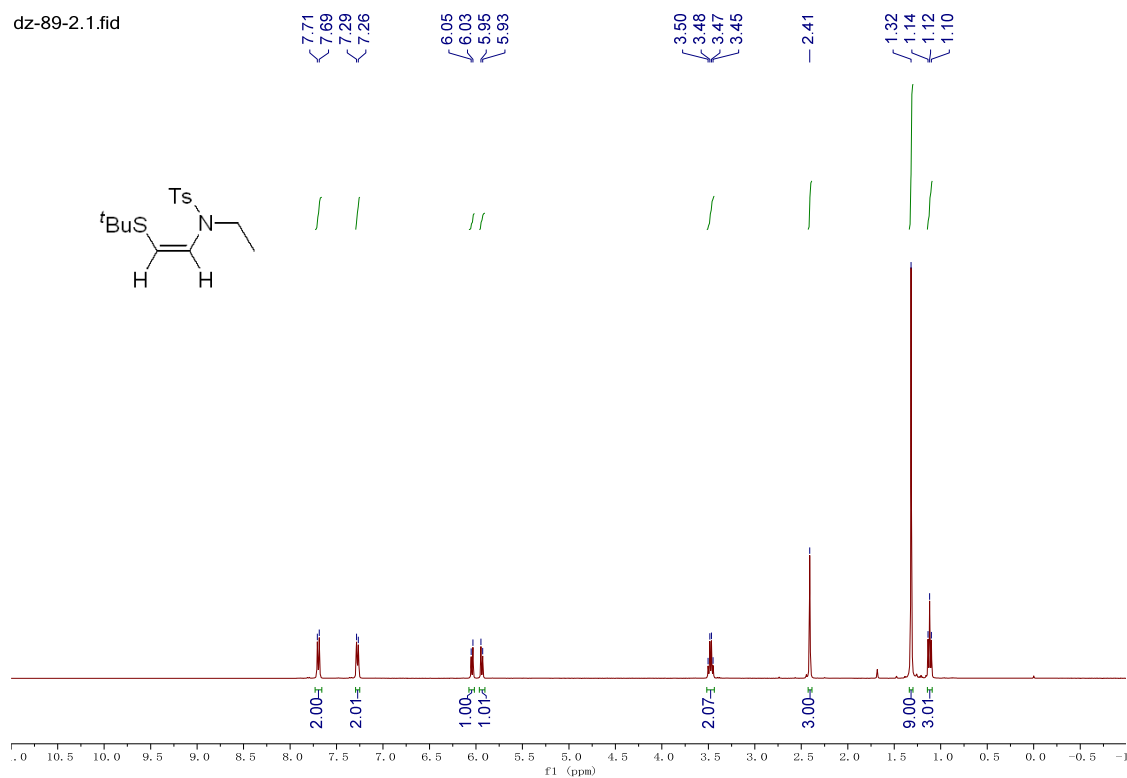

<sup>1</sup>H NMR of 4a

dz-89-2.2.fid

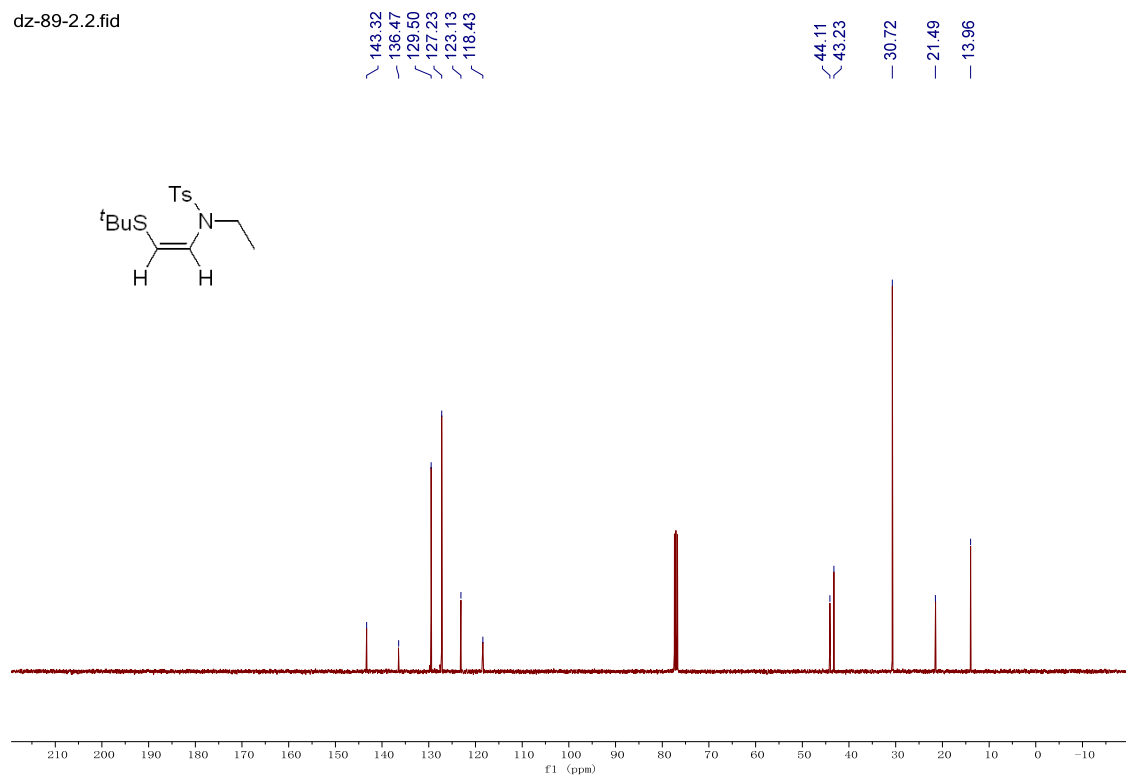

<sup>13</sup>C NMR of 4a



dz-3-21-1.1.fid

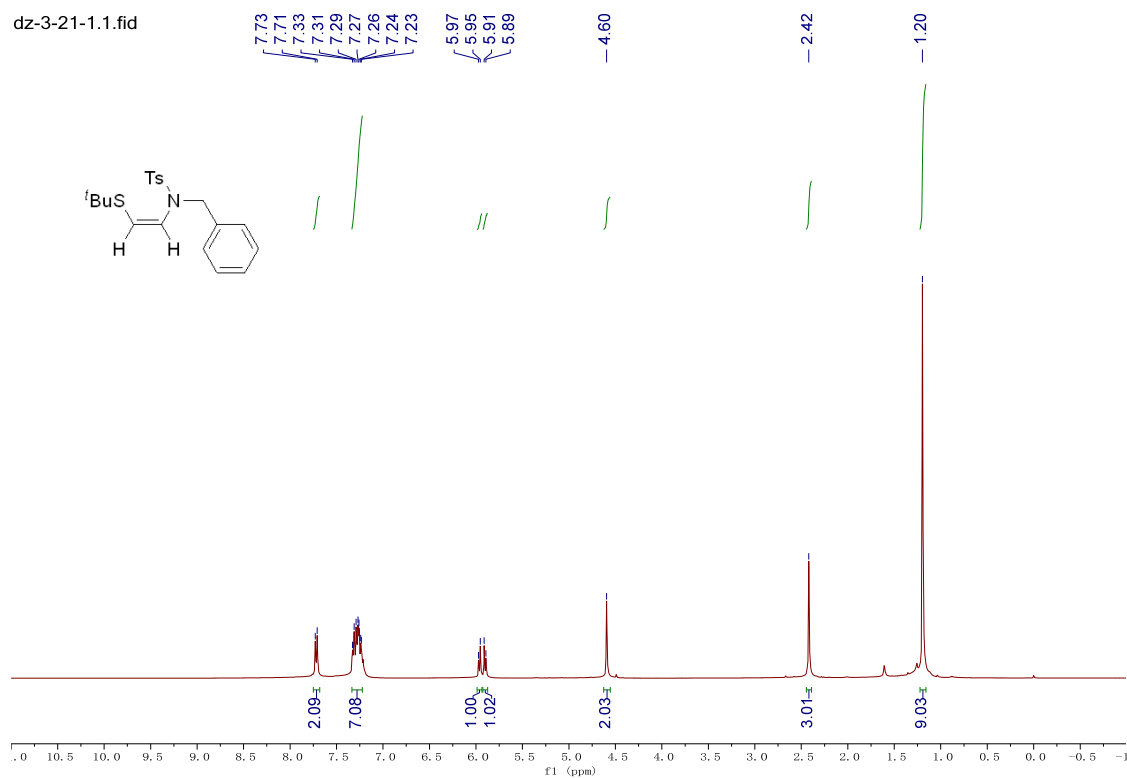

$^1\text{H NMR}$  of **4b**

dz-3-21-1.2.fid

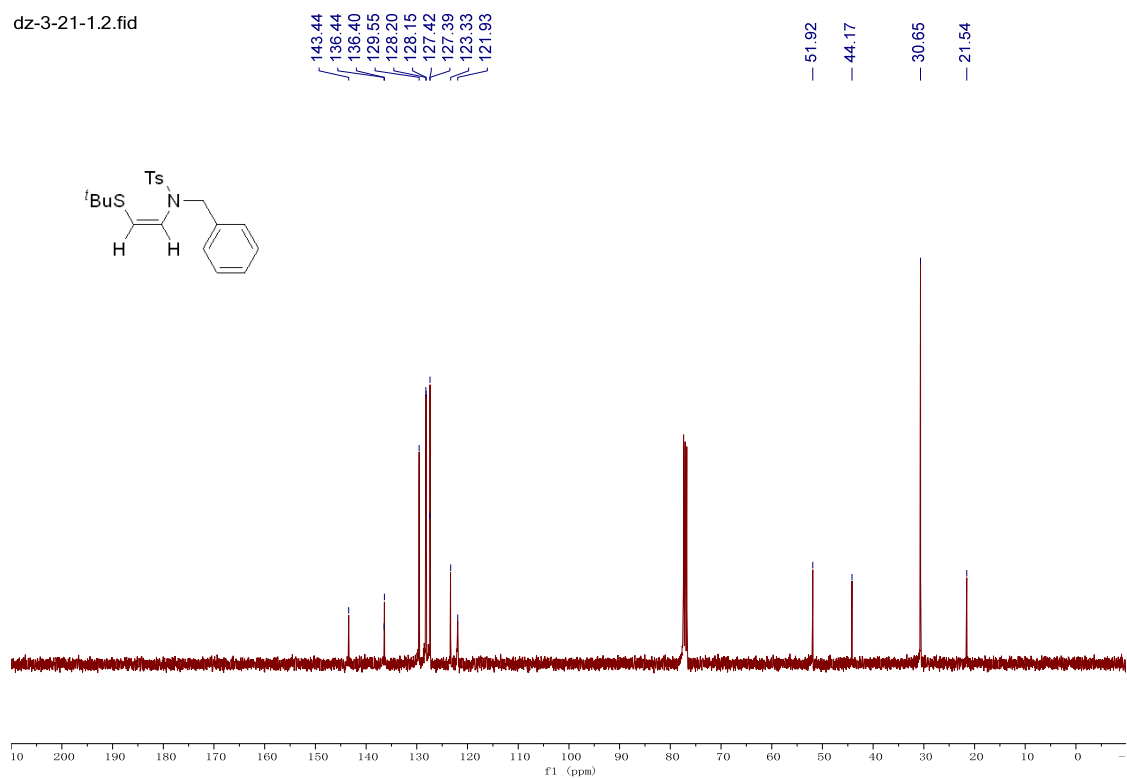

$^{13}\text{C NMR}$  of **4b**

dz-89-1.1.fid

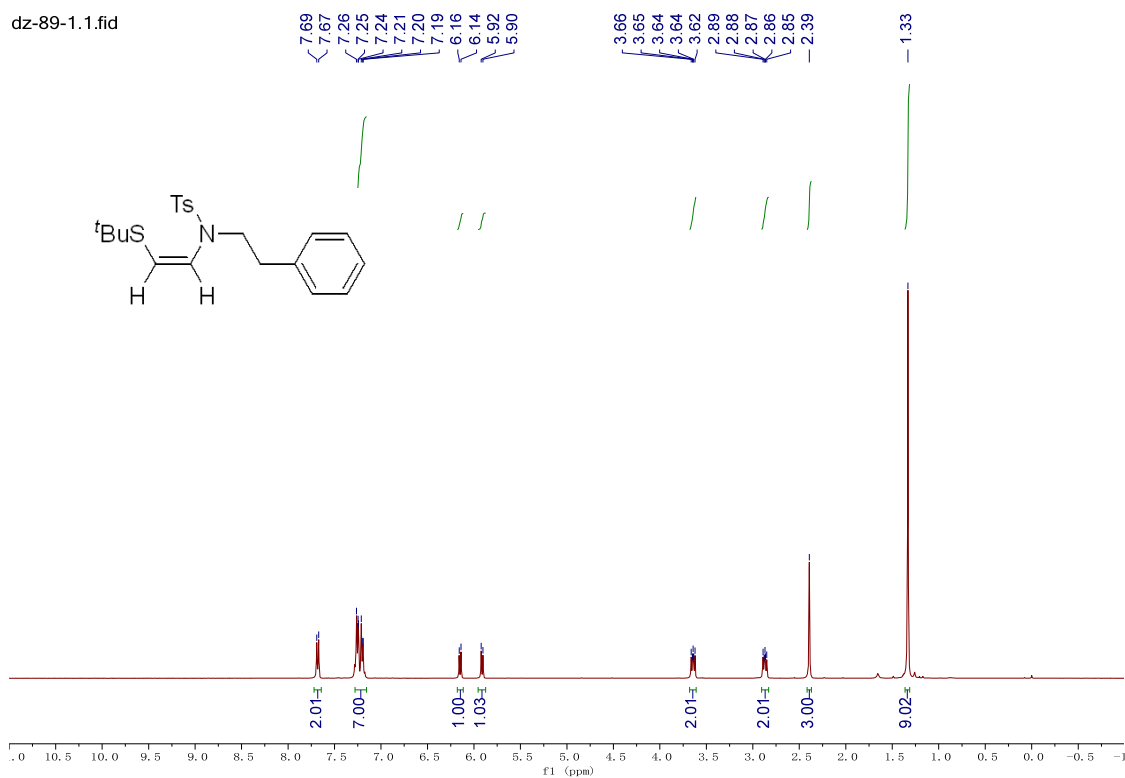

<sup>1</sup>H NMR of 4c

dz-89-1.2.fid

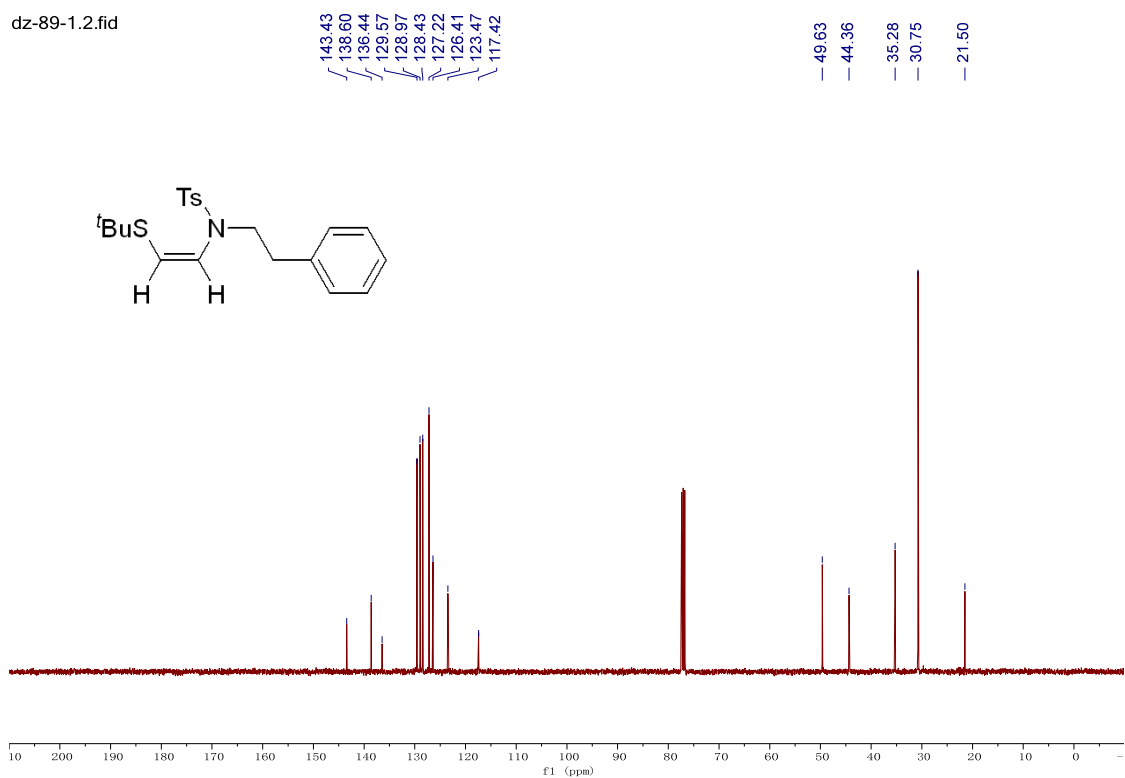

<sup>13</sup>C NMR of 4c

dz-3-33-3.1.fid

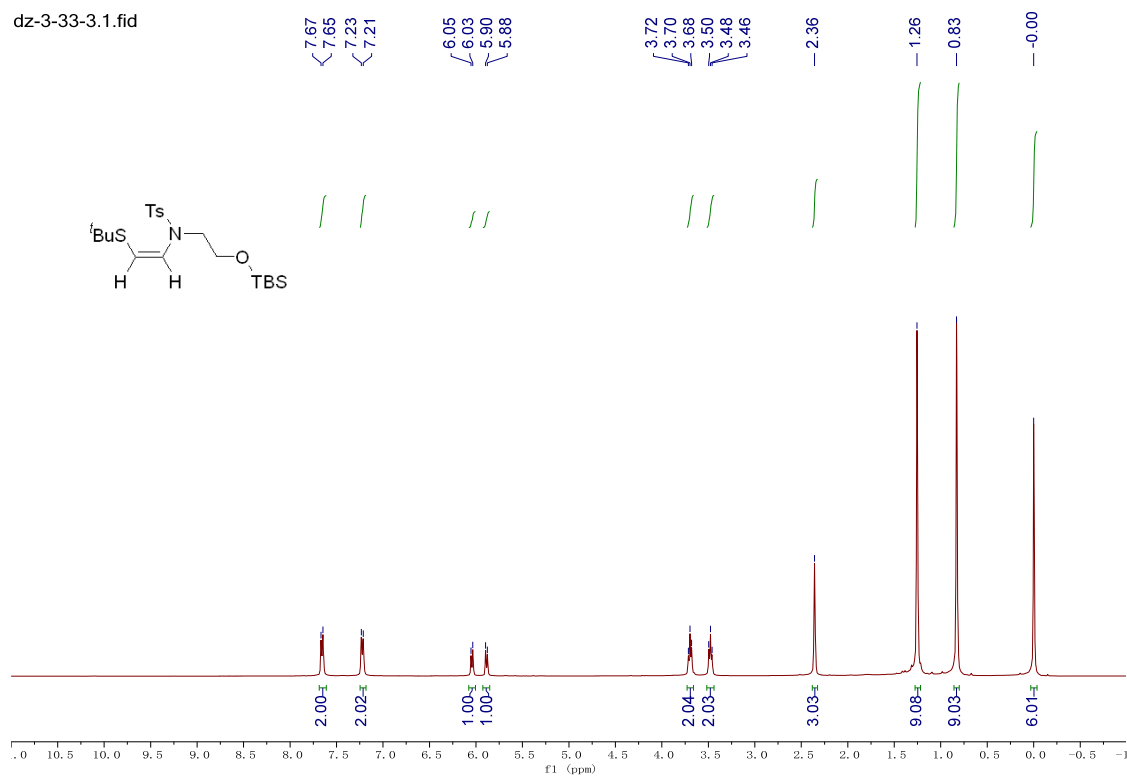

<sup>1</sup>H NMR of **4d**

dz-3-33-3-1.10.fid

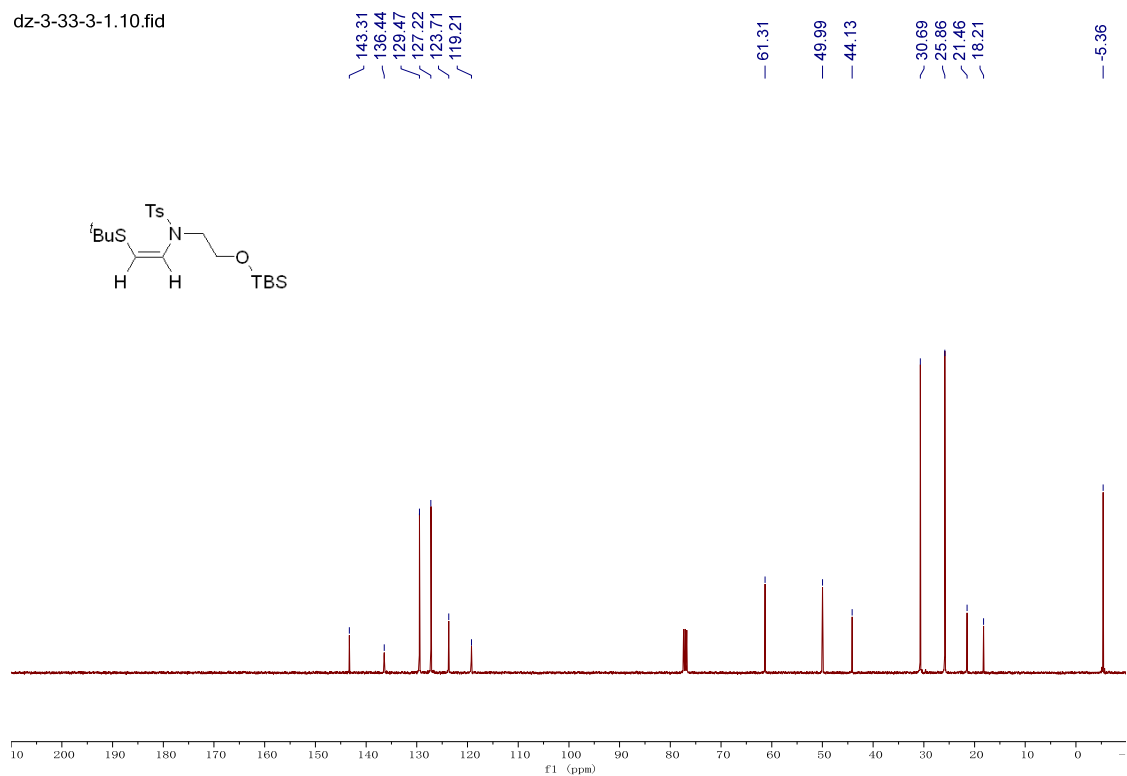

<sup>13</sup>C NMR of **4d**

dz-3-21-3.1.fid

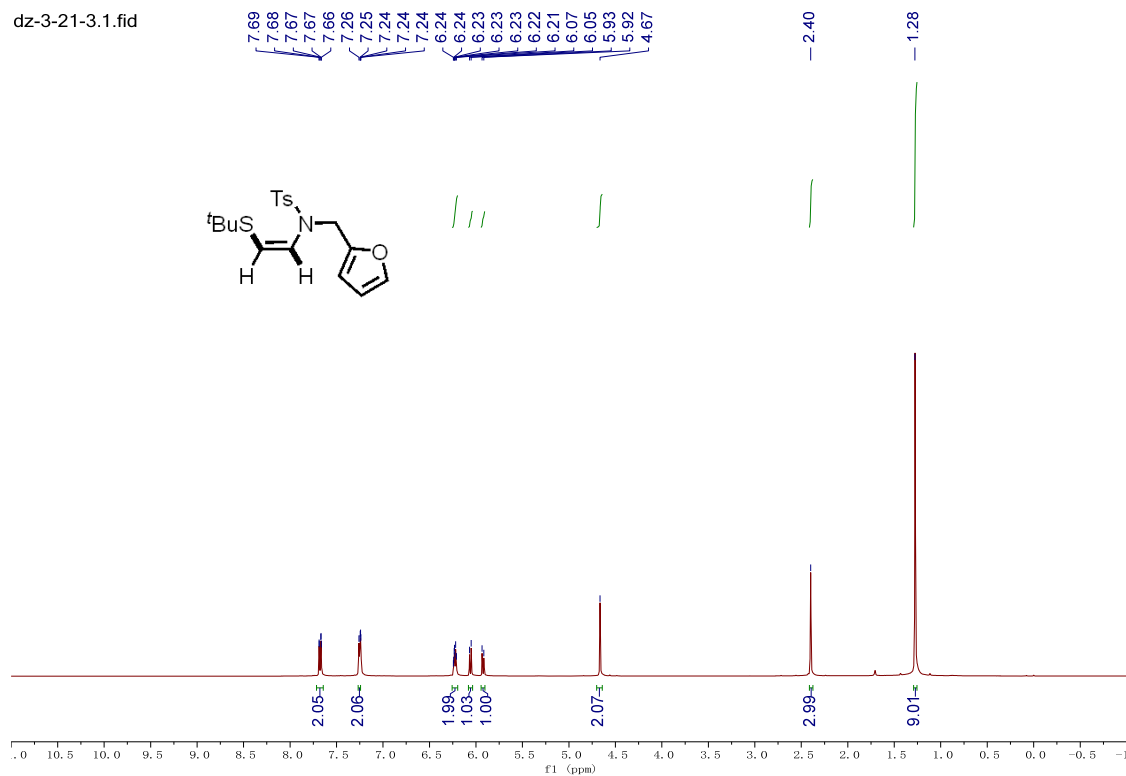

<sup>1</sup>H NMR of 4e

dz-3-21-3.2.fid

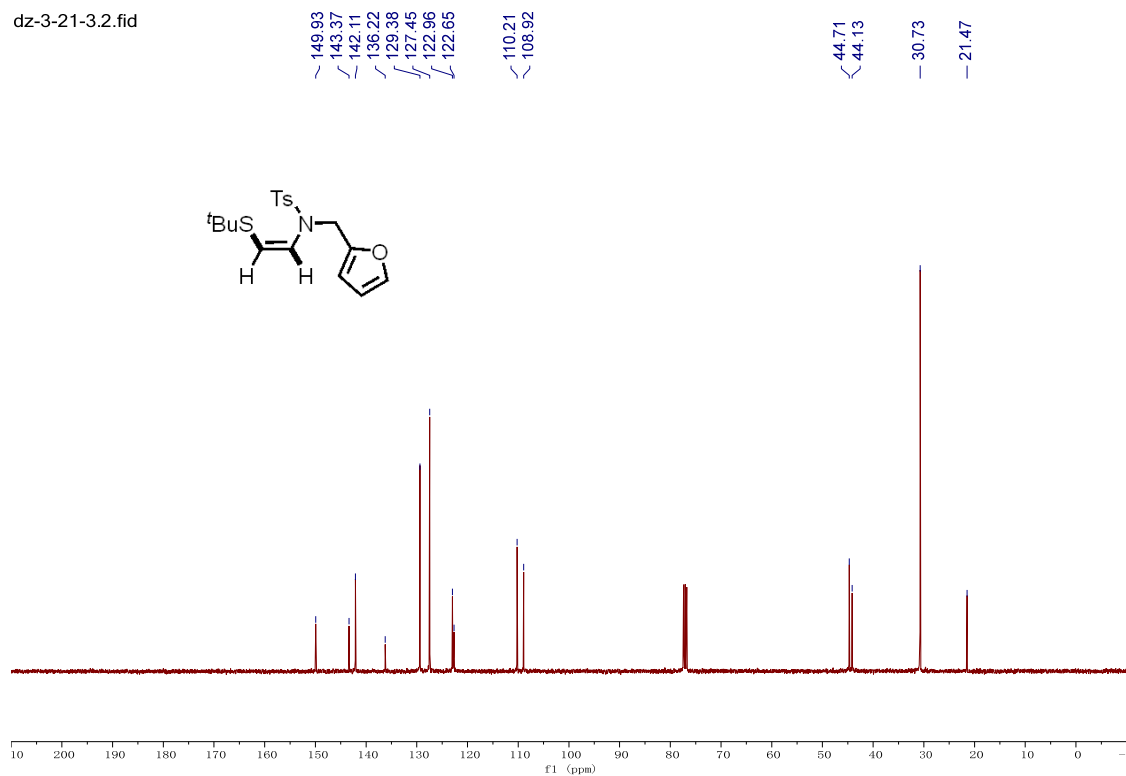

<sup>13</sup>C NMR of 4e

dz-4-87-d.1.fid

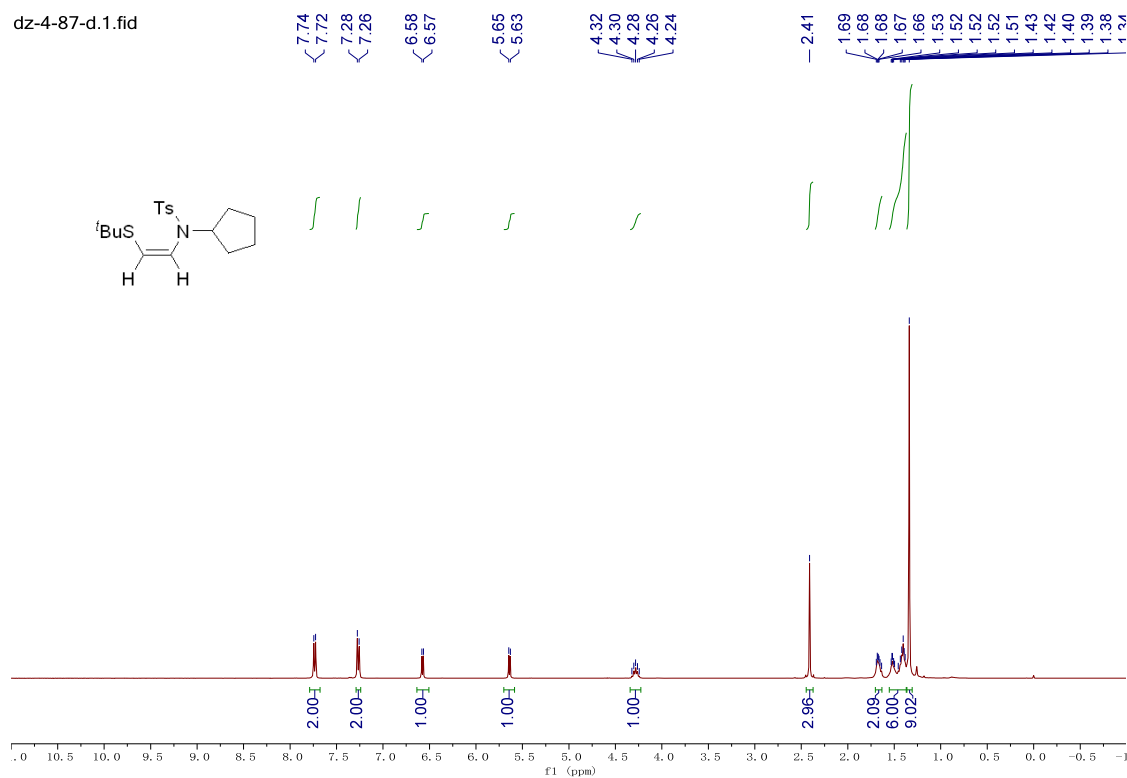

$^1\text{H}$  NMR of **4f**

dz-4-87-d.2.fid

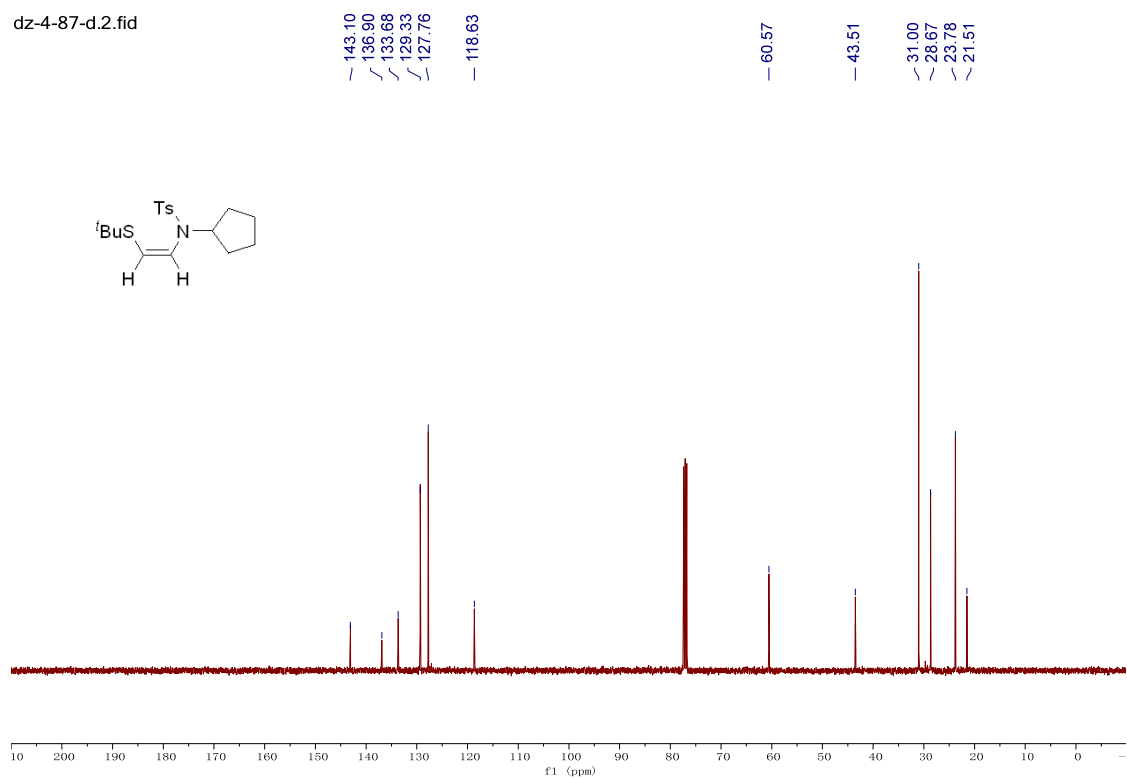

$^{13}\text{C}$  NMR of **4f**

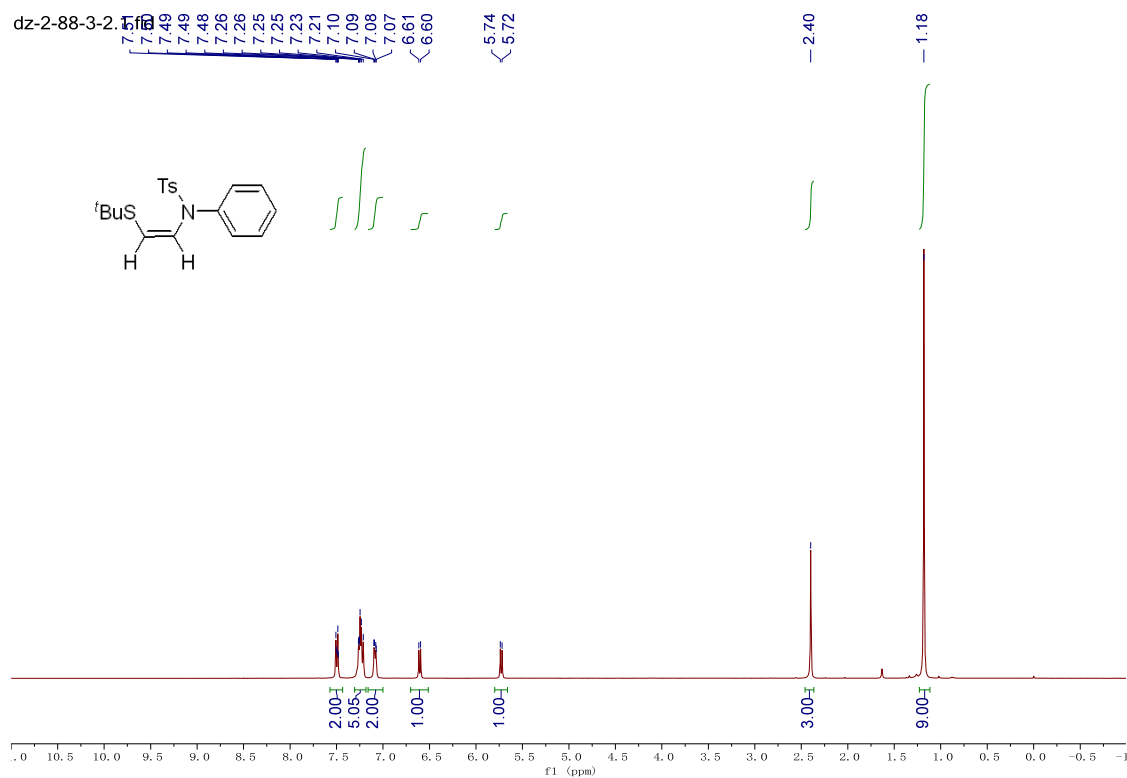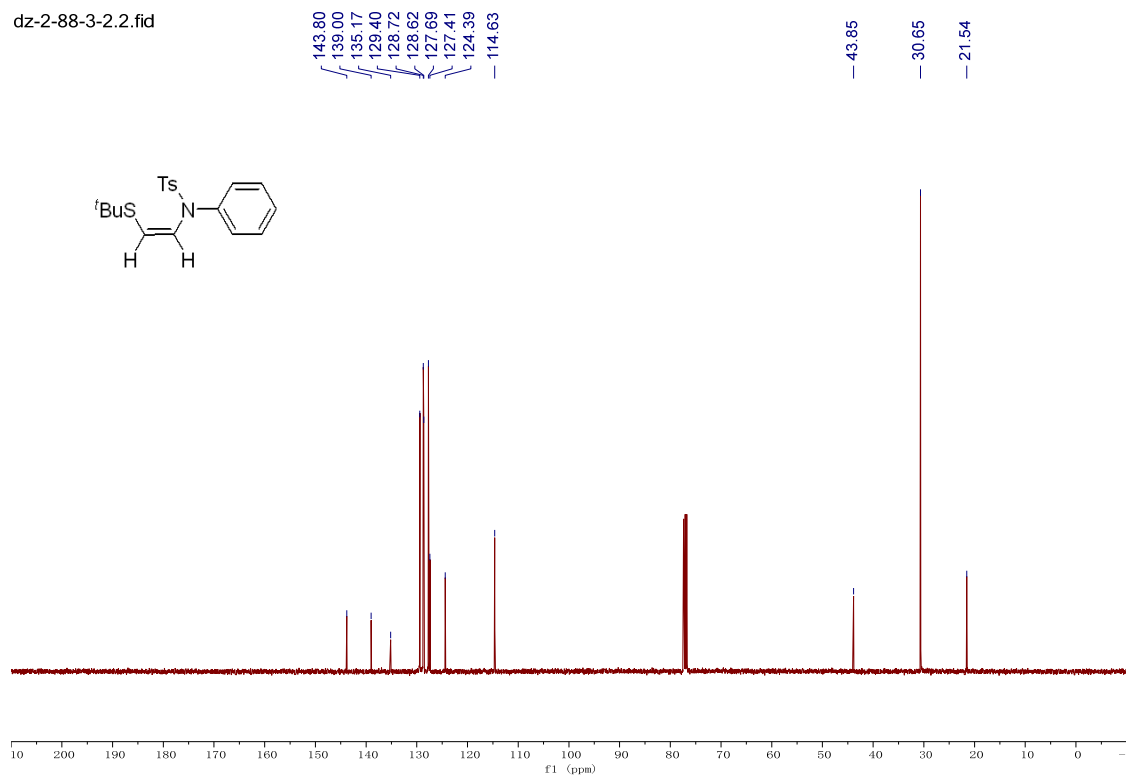

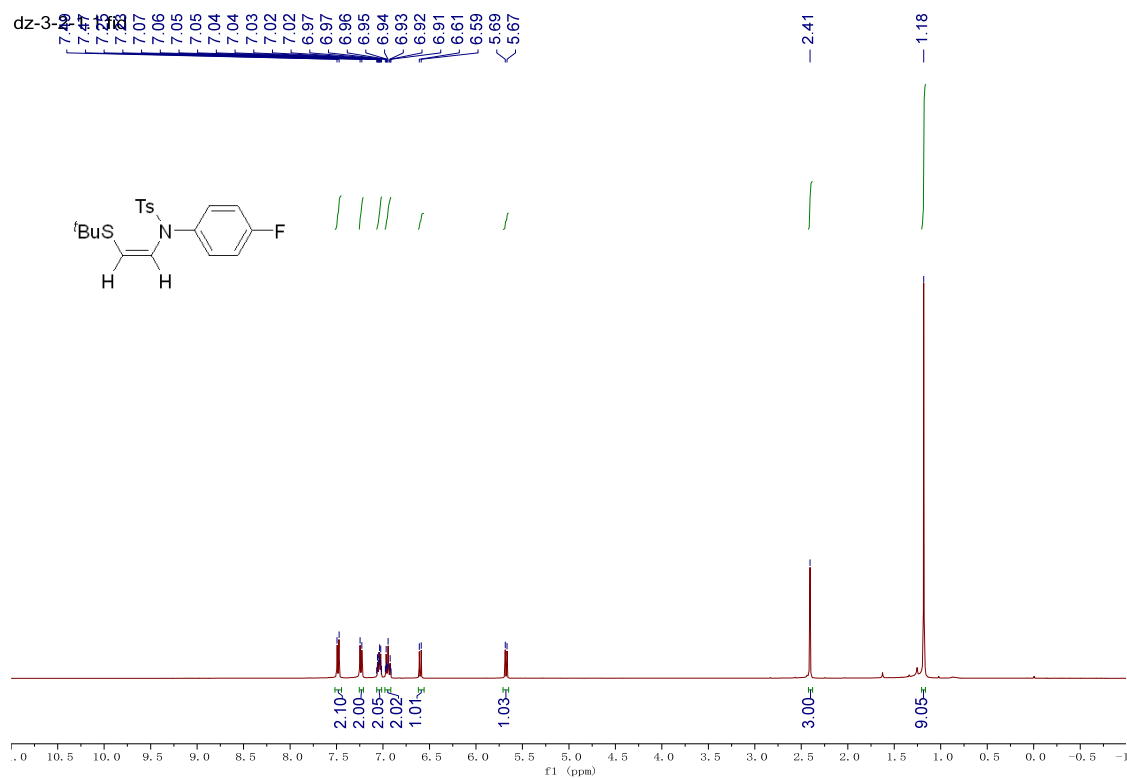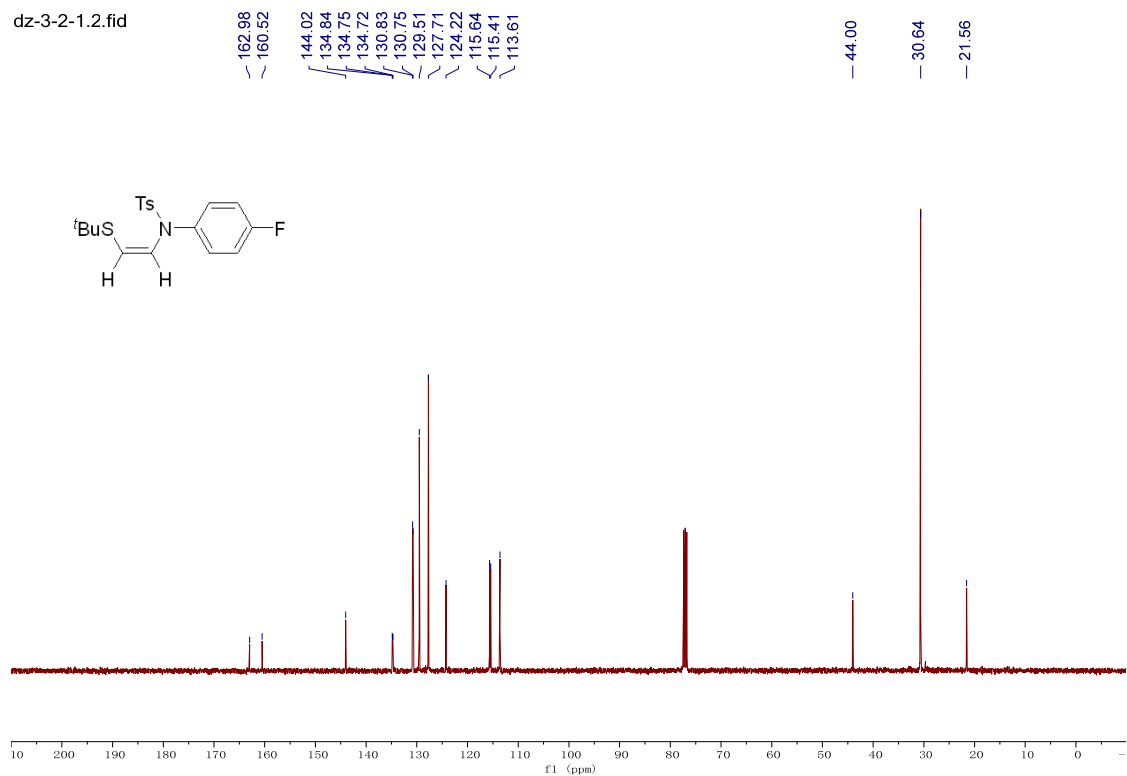

dz-3-2-4.1.fid

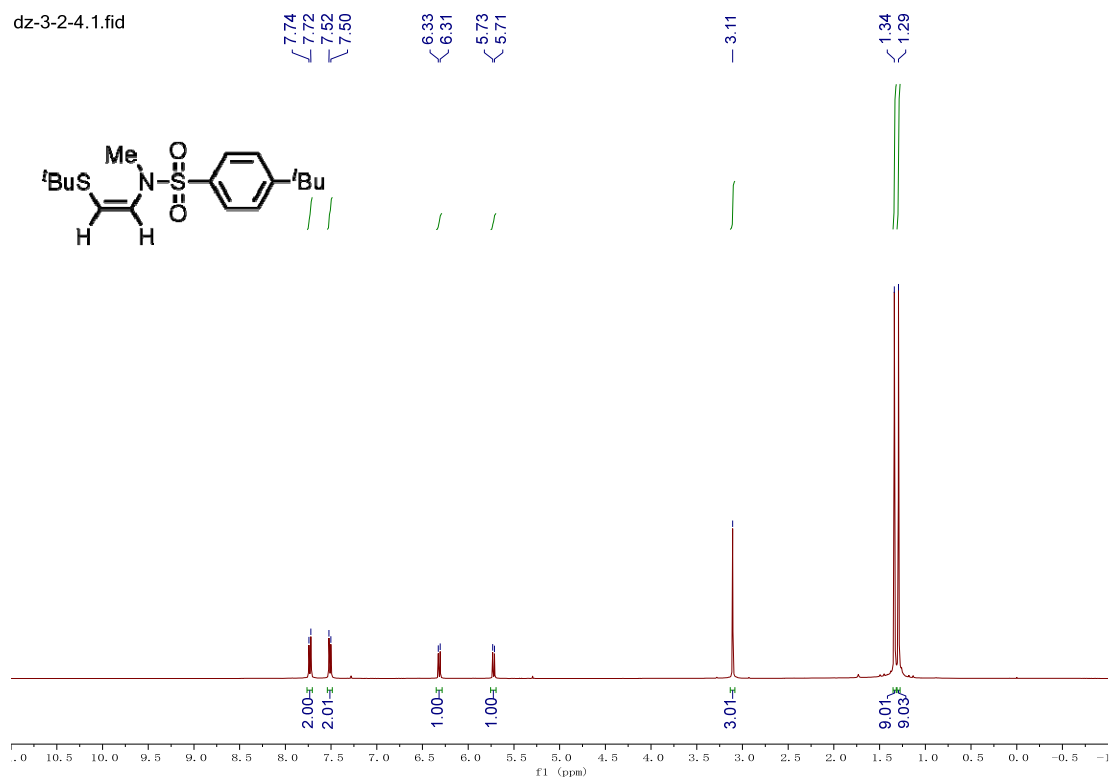

<sup>1</sup>H NMR of **4i**

dz-3-2-4.2.fid

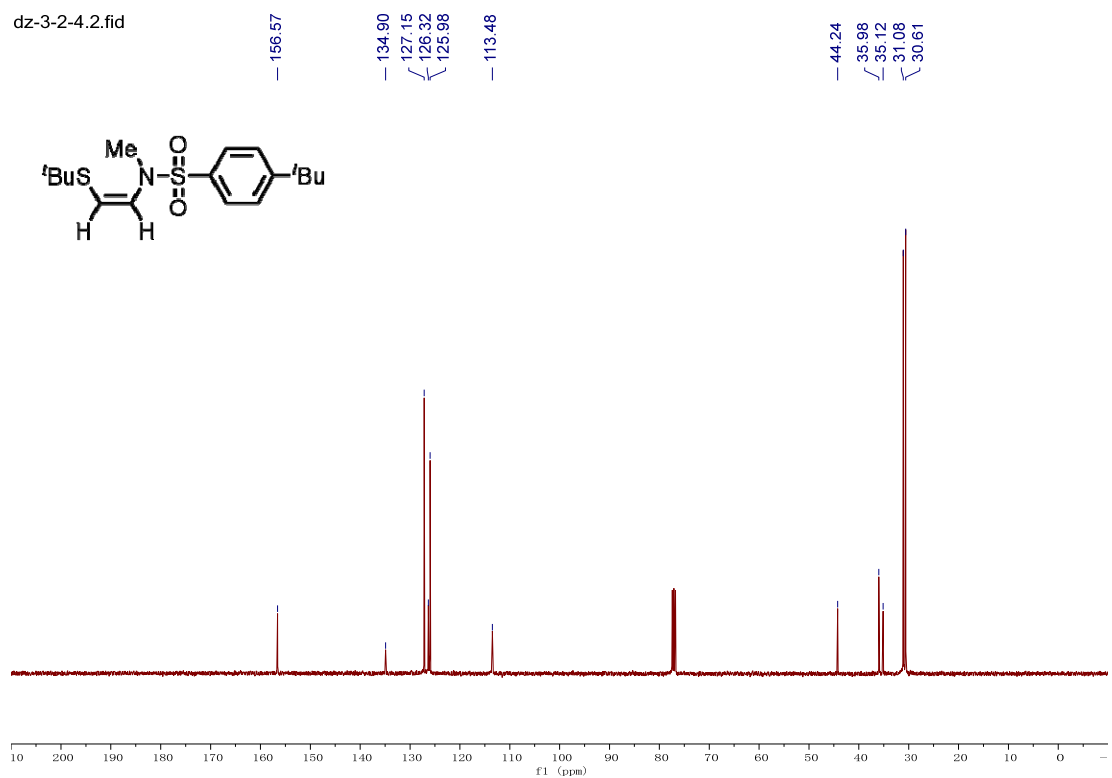

<sup>13</sup>C NMR of **4i**



dz-2-88-1-1.10.fid

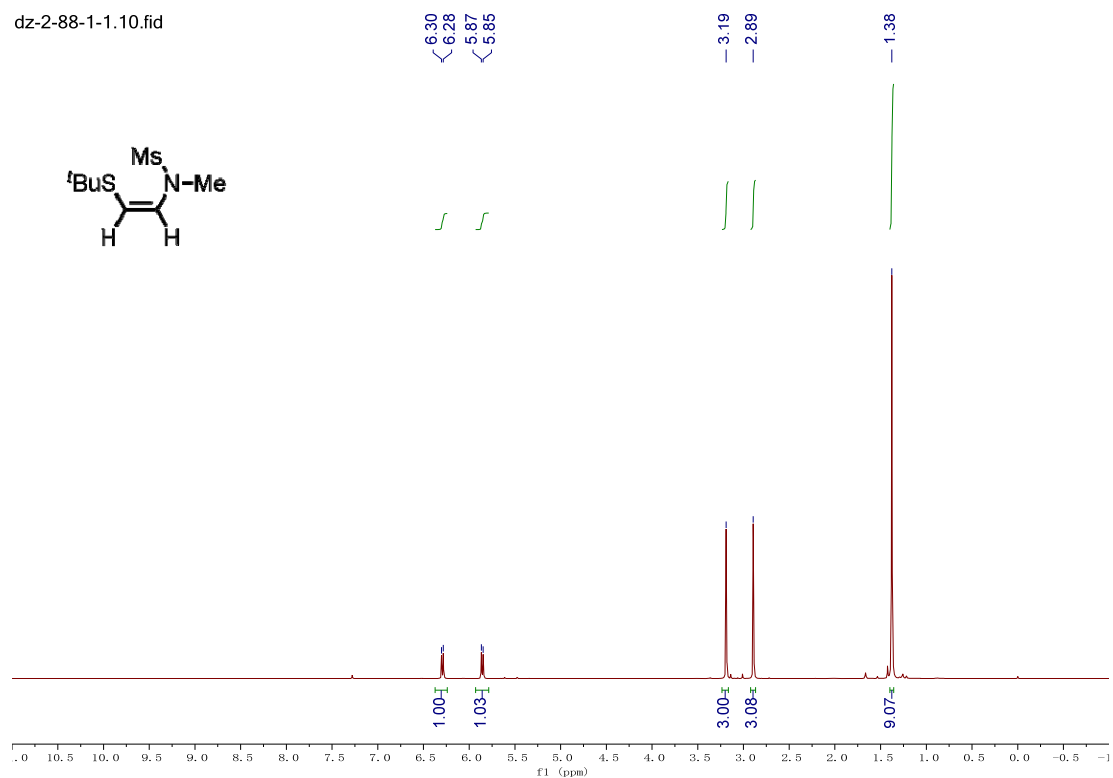

<sup>1</sup>H NMR of 4j

dz-2-88-1.1.fid

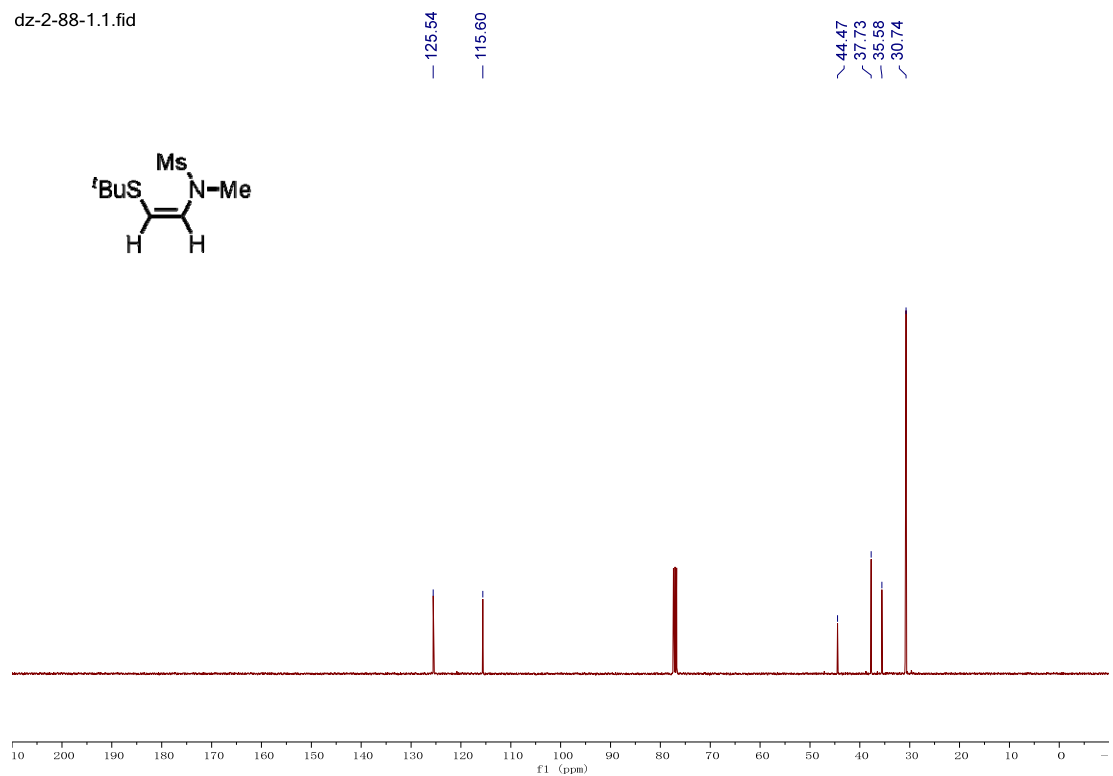

<sup>13</sup>C NMR of 4j

dz-3-14-1.1.fid

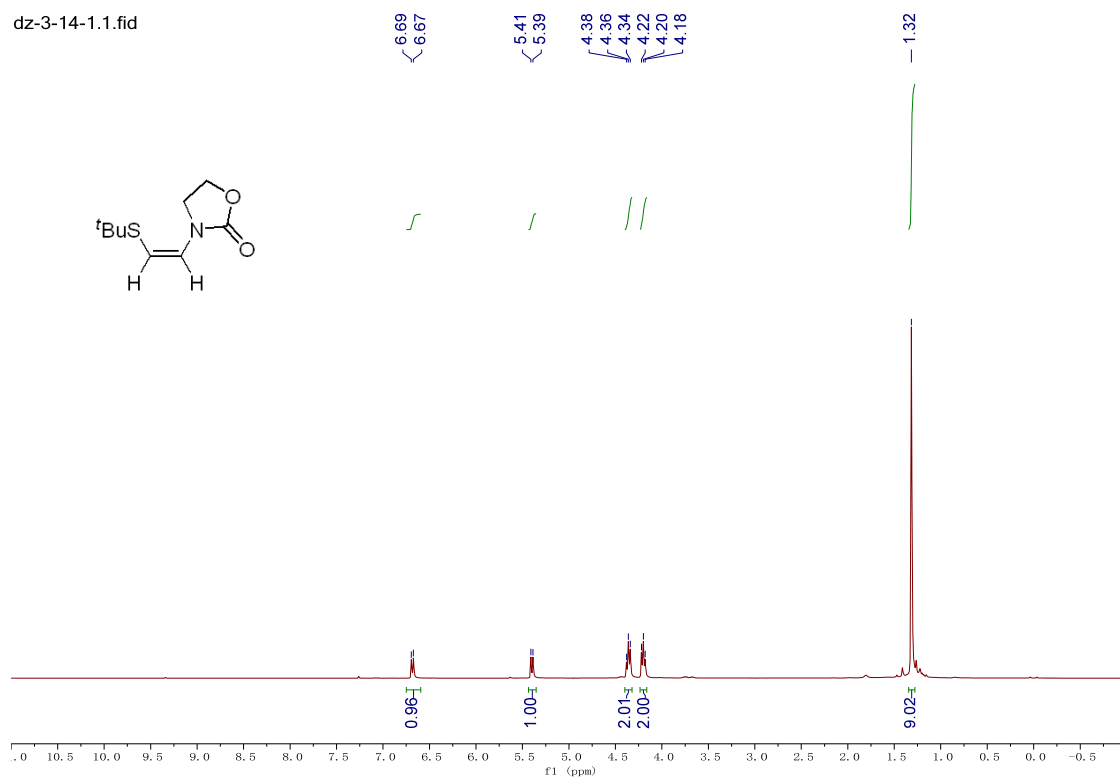

<sup>1</sup>H NMR of 4k

dz-3-14-1.2.fid

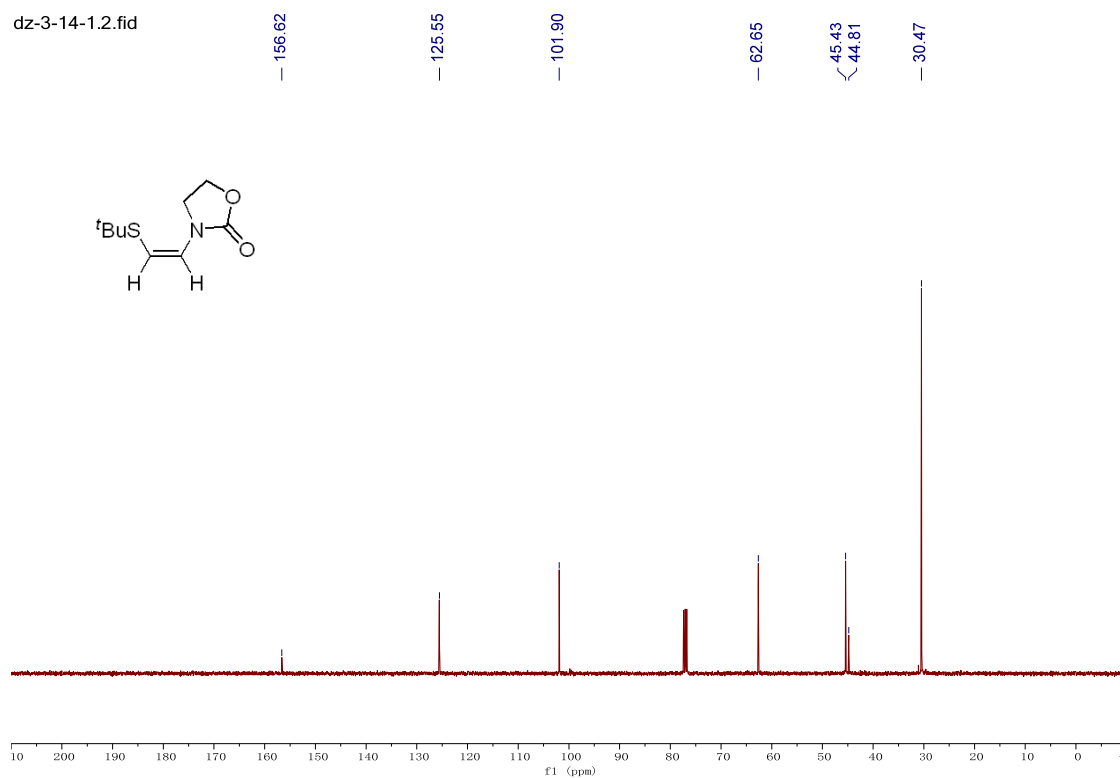

<sup>13</sup>C NMR of 4k

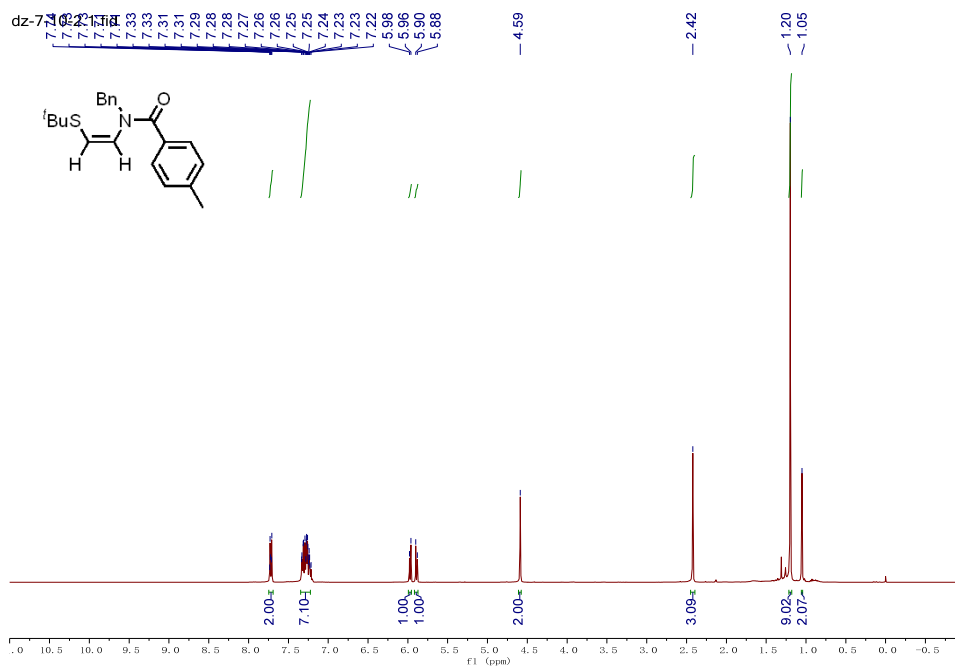

$^1\text{H}$  NMR of **4I**

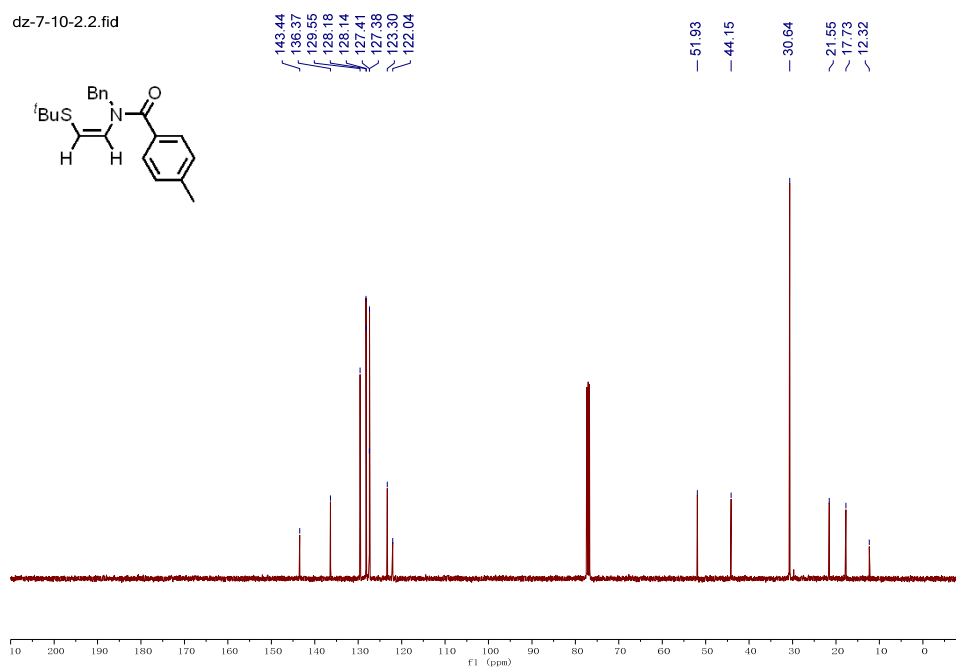

$^{13}\text{C}$  NMR of **4I**

ZZJ-15-67. 1. fid

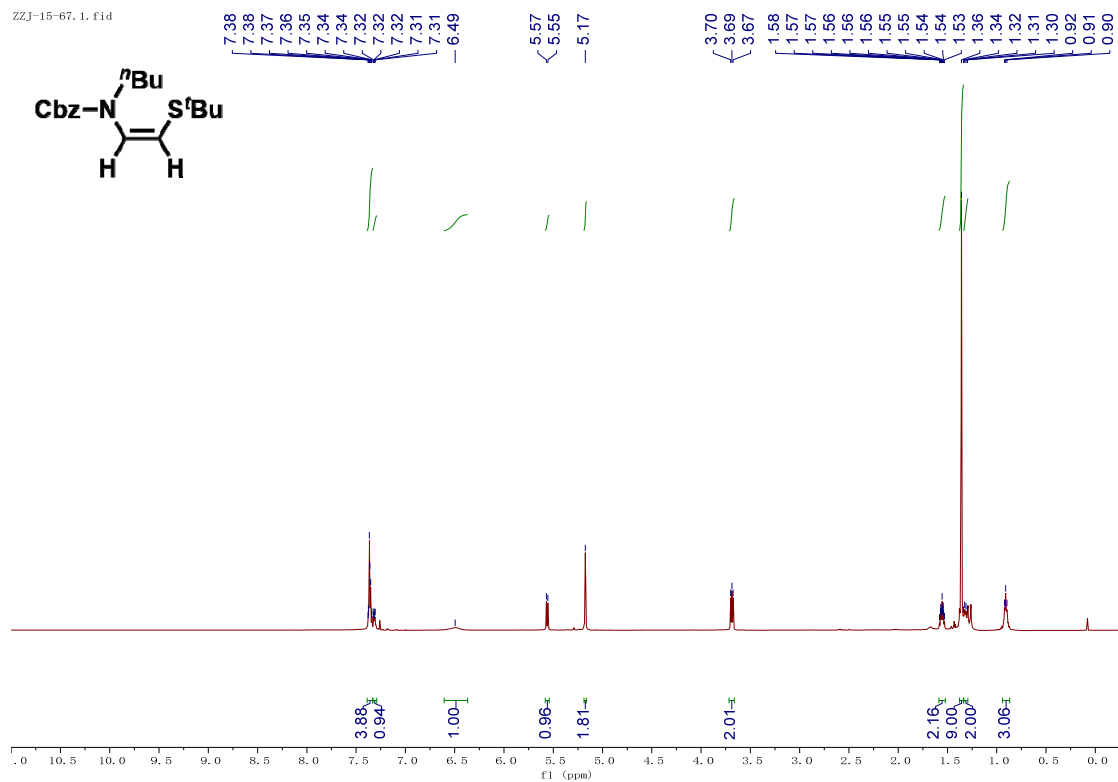

<sup>1</sup>H NMR of 4m

ZZJ-15-67. 2. fid

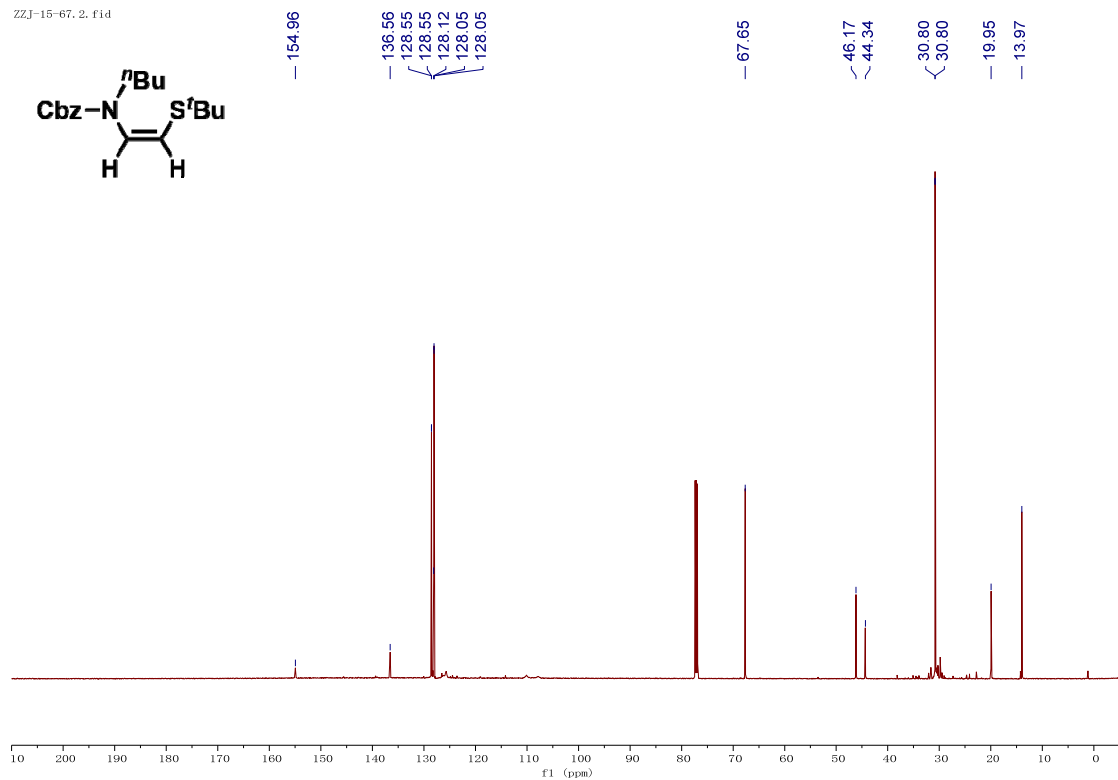

<sup>13</sup>C NMR of 4m

dz-8-68.1.fid

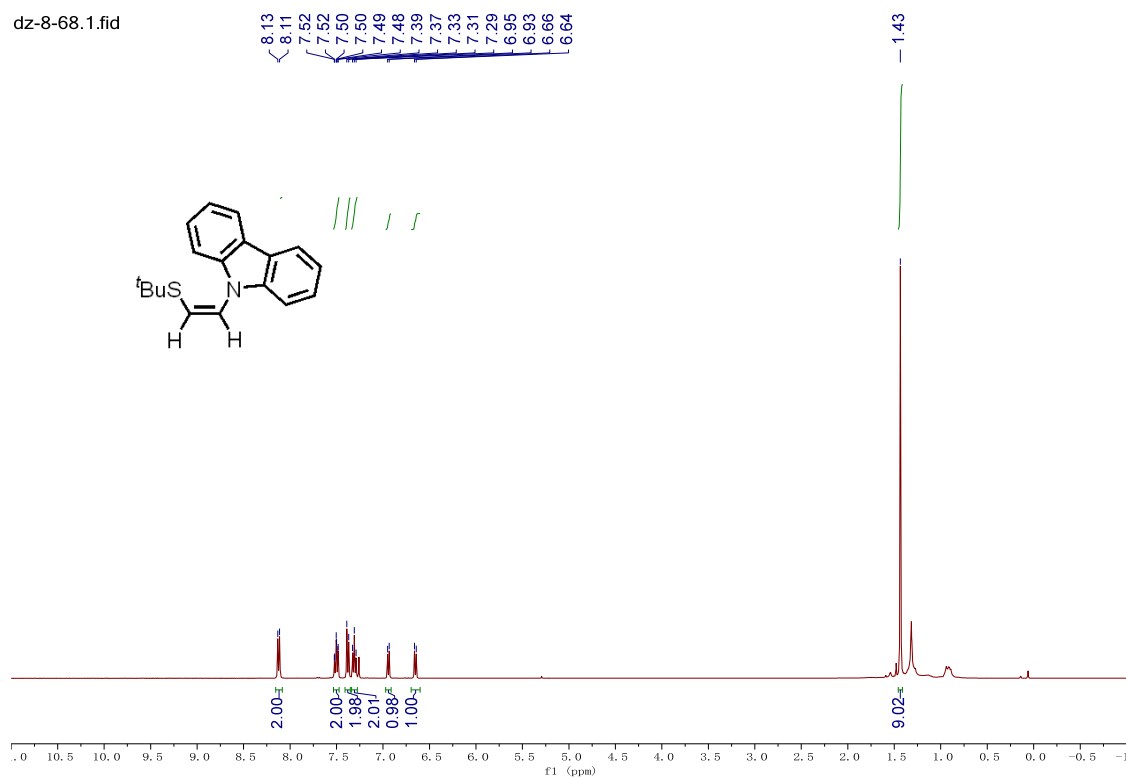

<sup>1</sup>H NMR of 4n

dz-8-68.2.fid

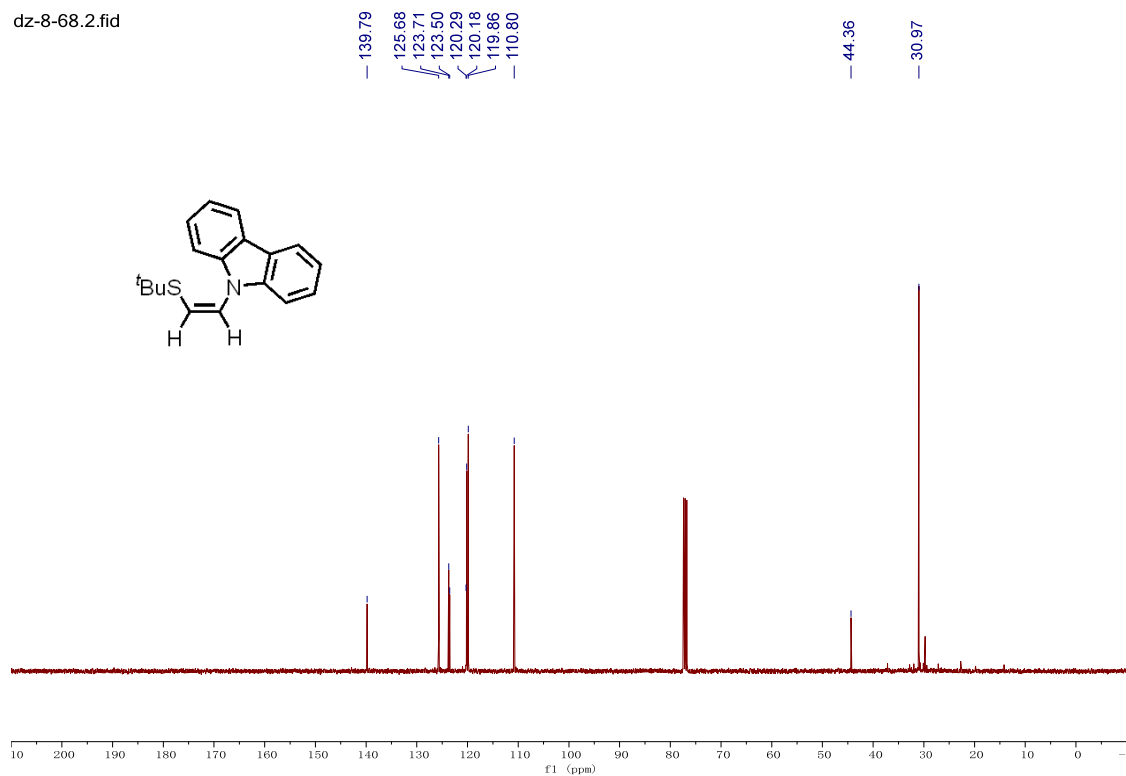

<sup>13</sup>C NMR of 4n

dz-8-60.1.fid

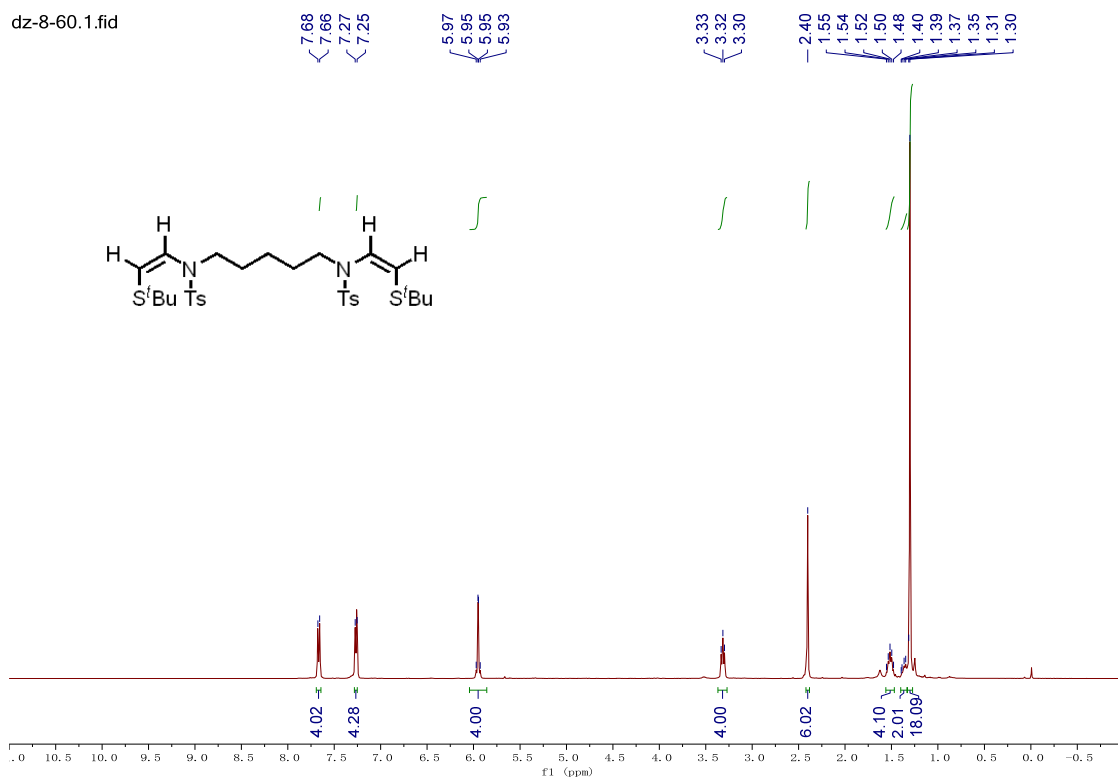

<sup>1</sup>H NMR of **4o**

dz-8-60.2.fid

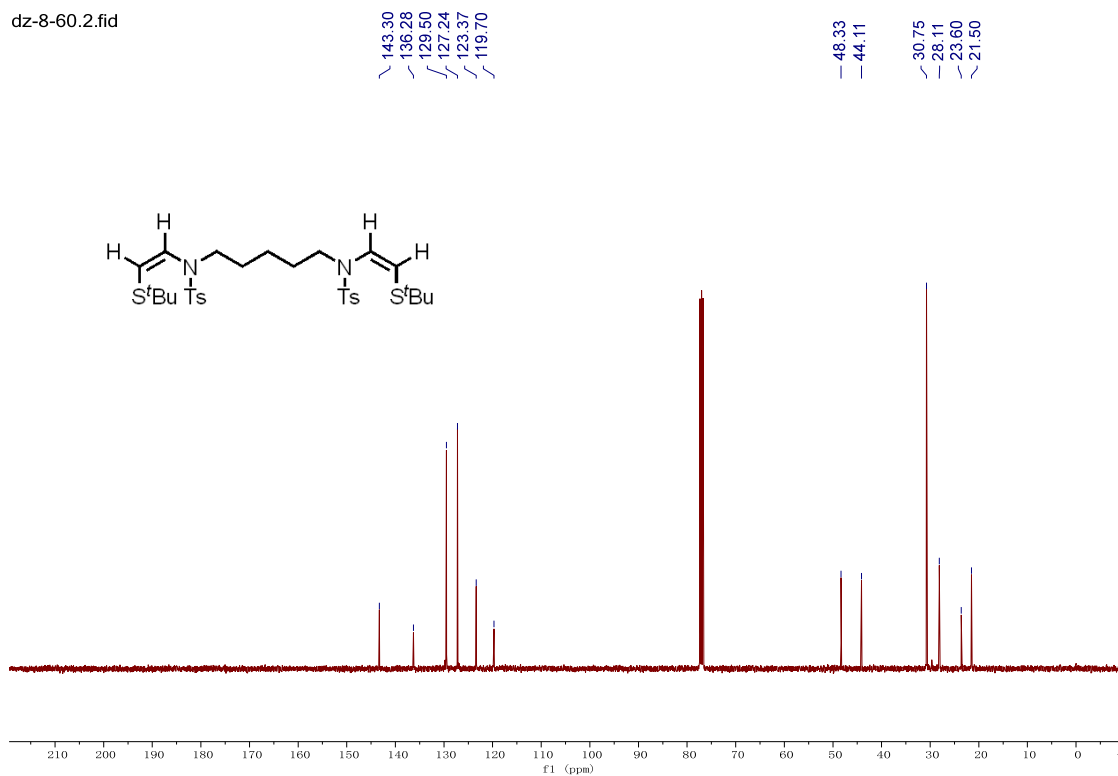

<sup>13</sup>C NMR of **4o**

dz-4-53-1.1.fid

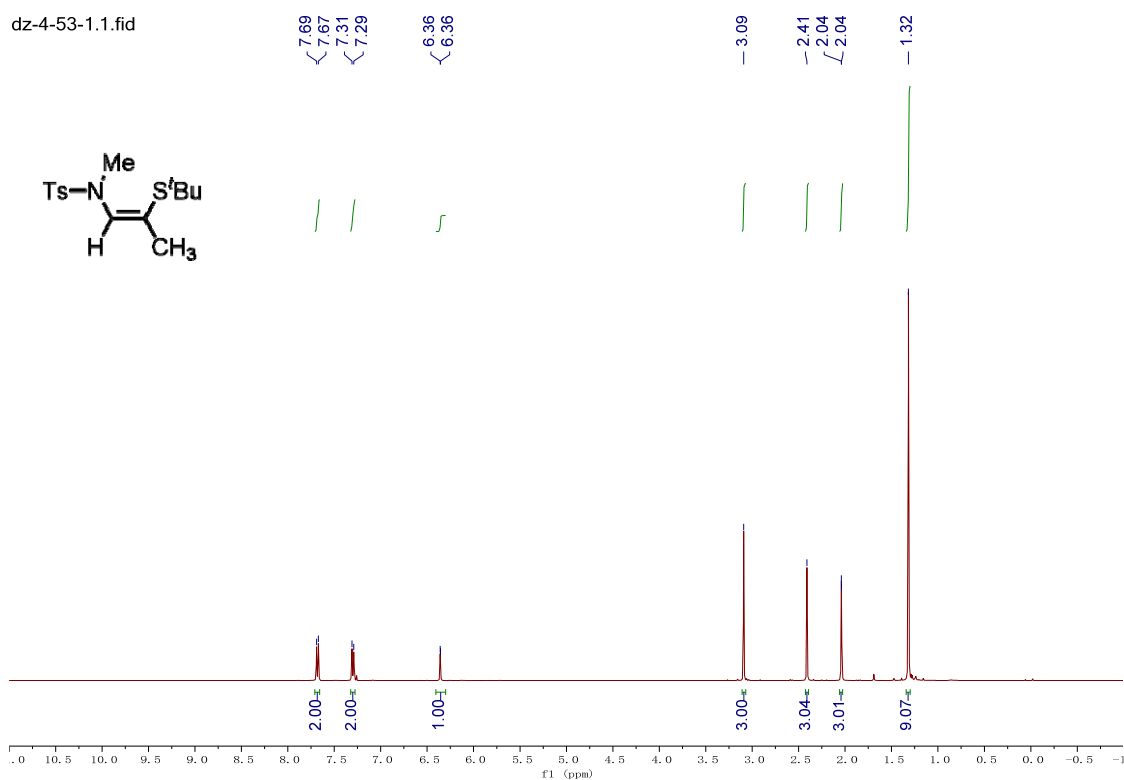

<sup>1</sup>H NMR of 6a

dz-3-30-2-1.2.fid

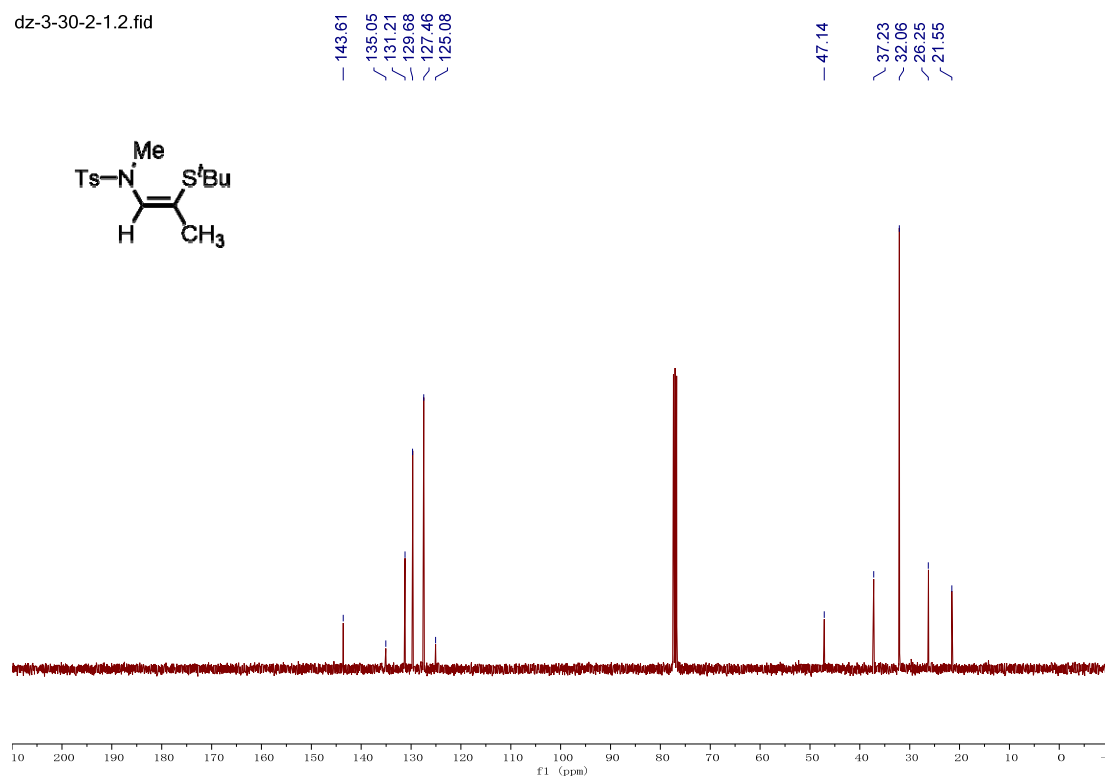

<sup>13</sup>C NMR of 6a

dz-4-55-2.1.fid

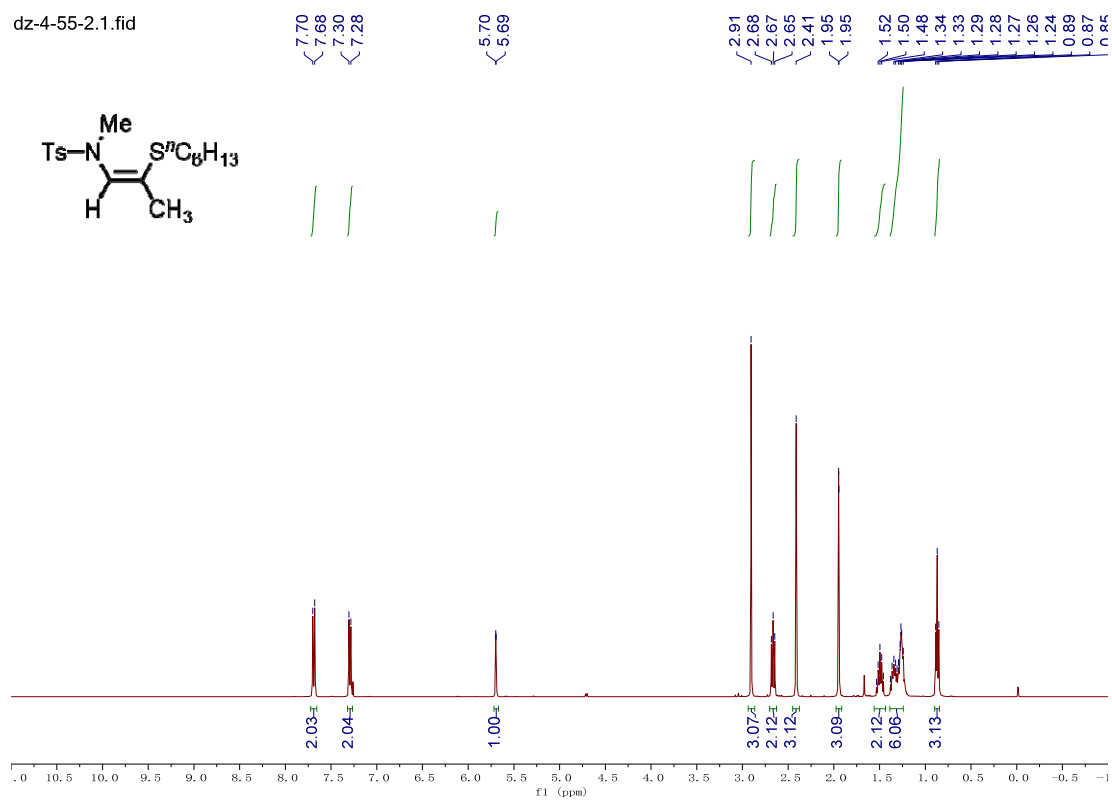

$^1\text{H}$  NMR of **6b**

dz-4-55-2.2.fid

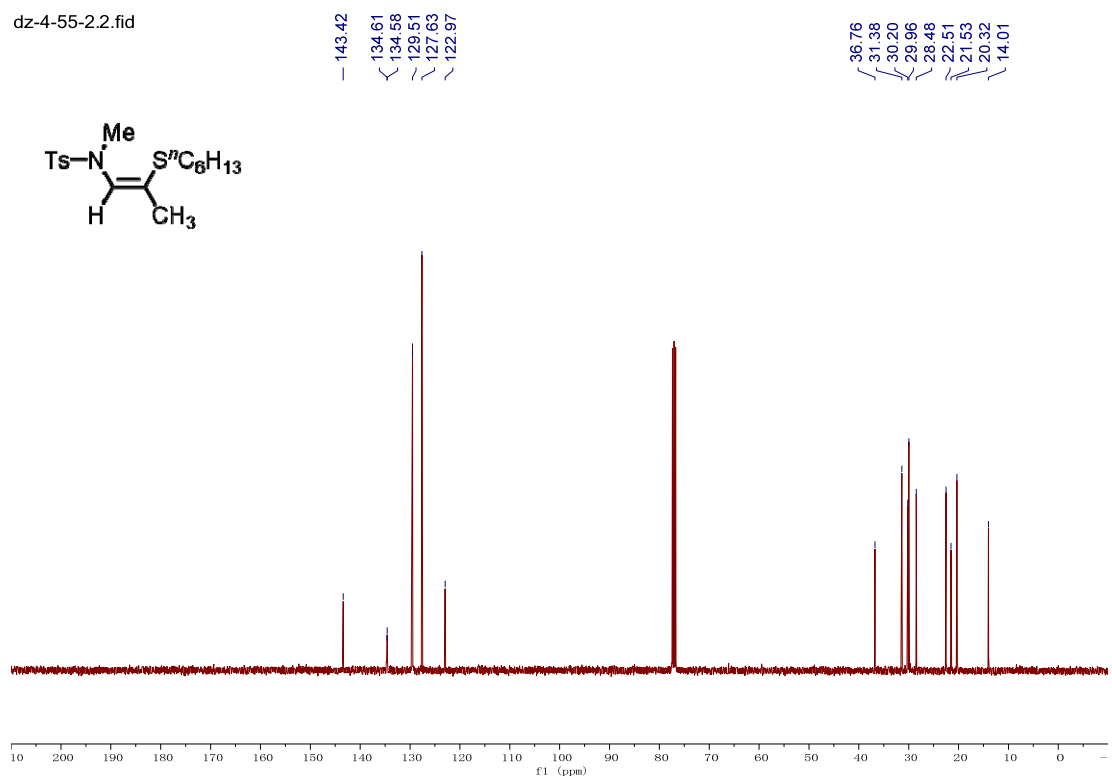

$^{13}\text{C}$  NMR of **6b**



dz-4-55-3.1.fid

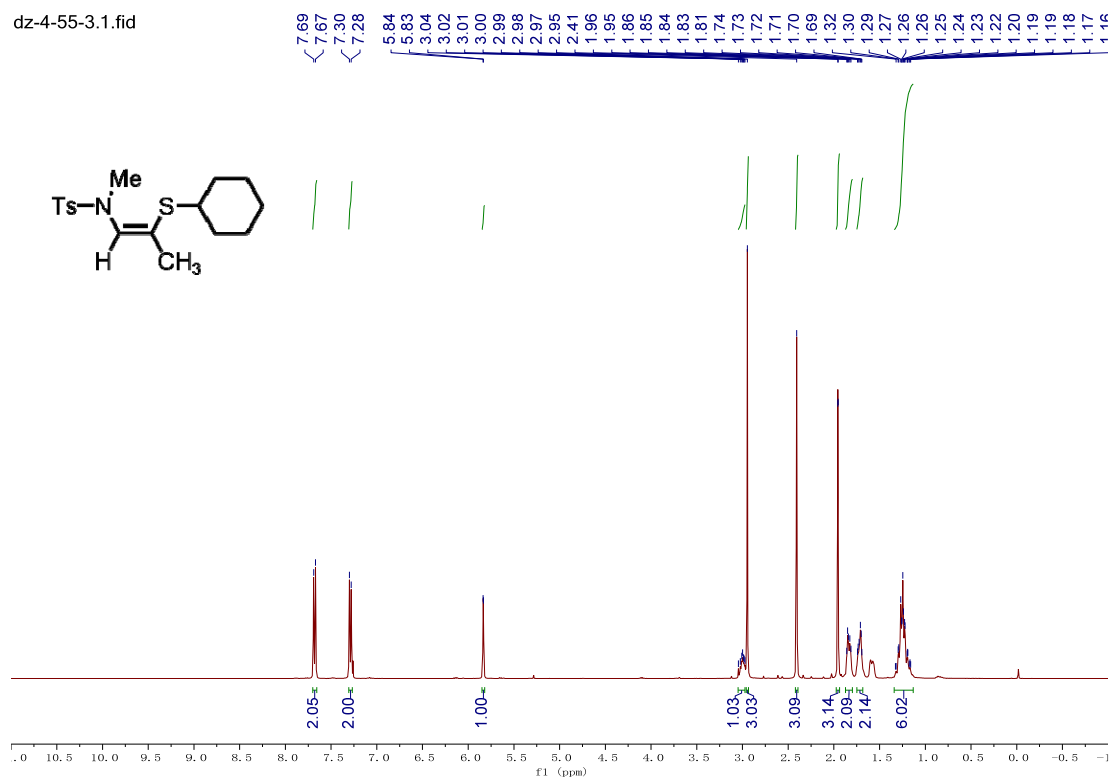

<sup>1</sup>H NMR of 6c

dz-4-55-3.2.fid

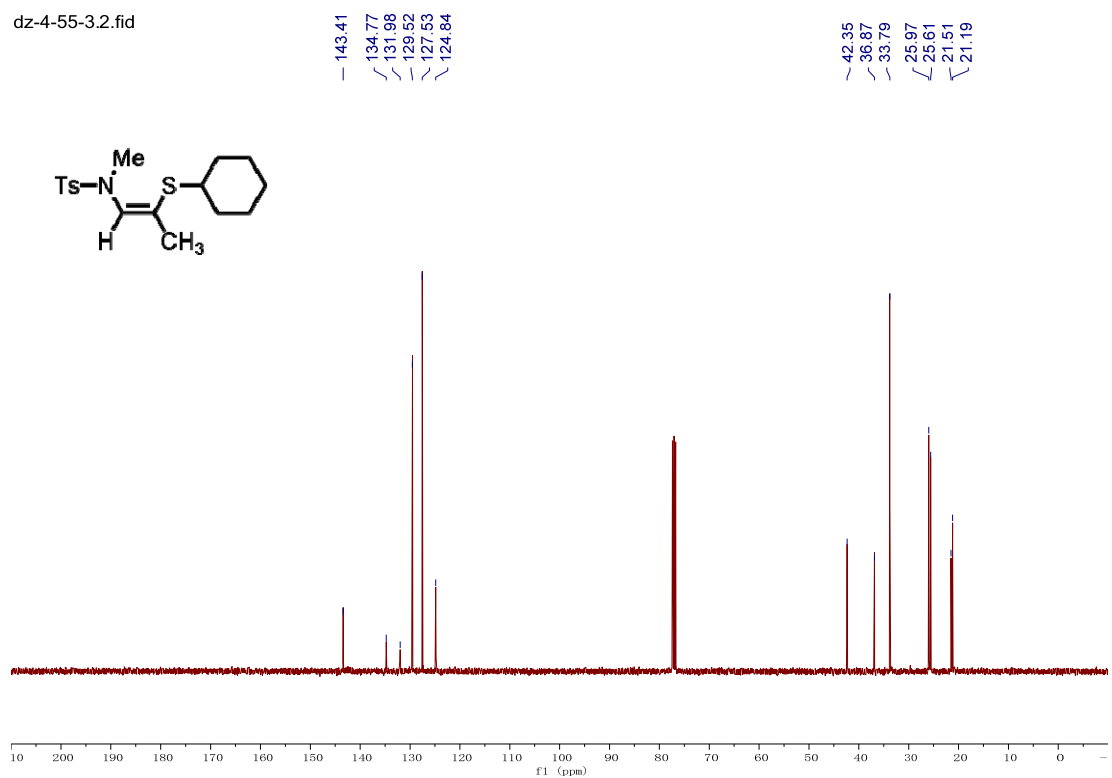

<sup>13</sup>C NMR of 6c

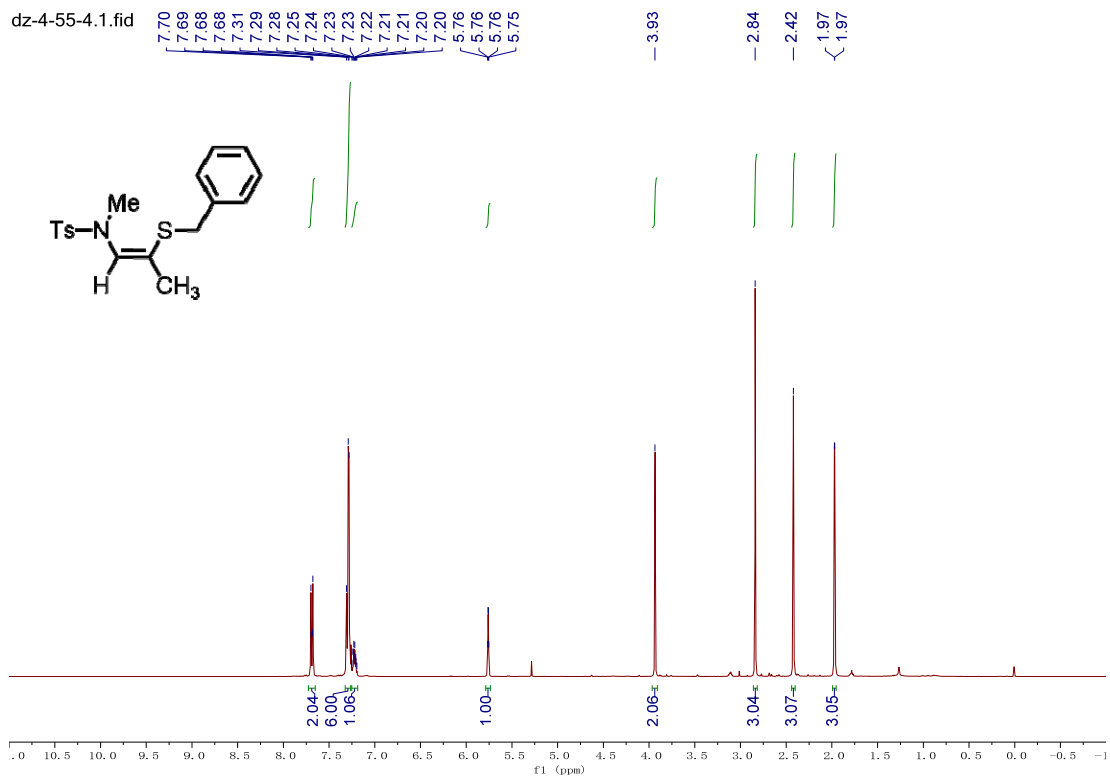

<sup>1</sup>H NMR of 6d

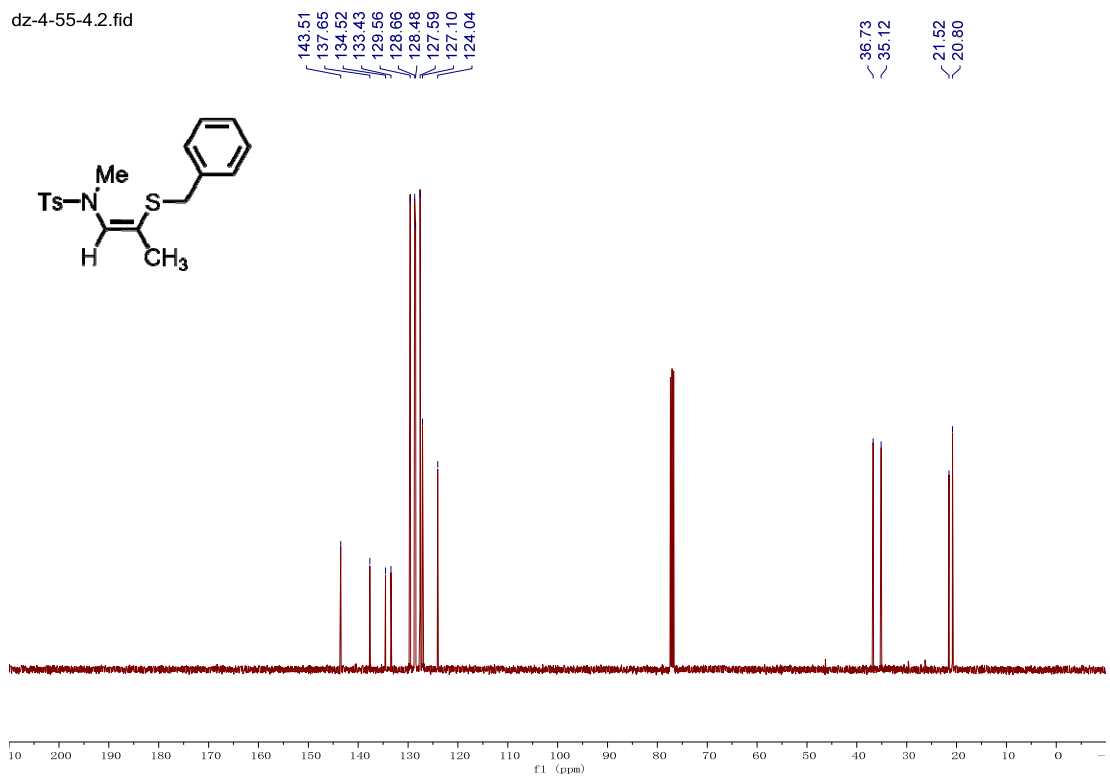

<sup>13</sup>C NMR of 6d

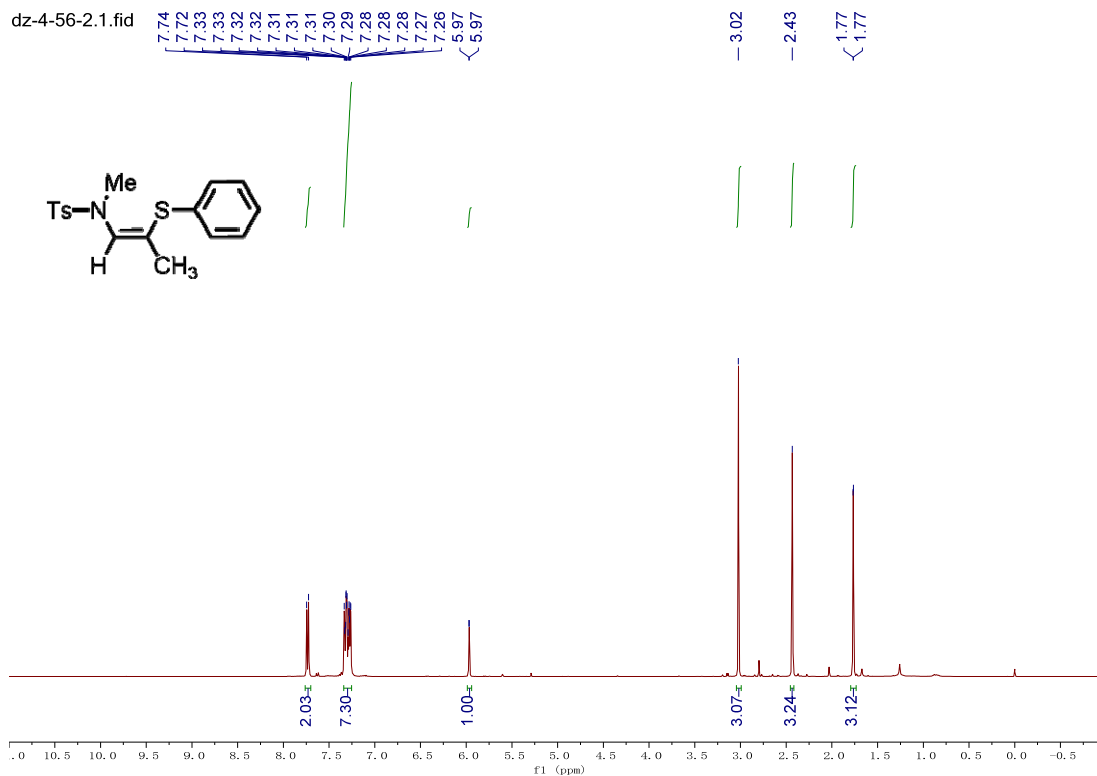

$^1\text{H NMR}$  of **6e**

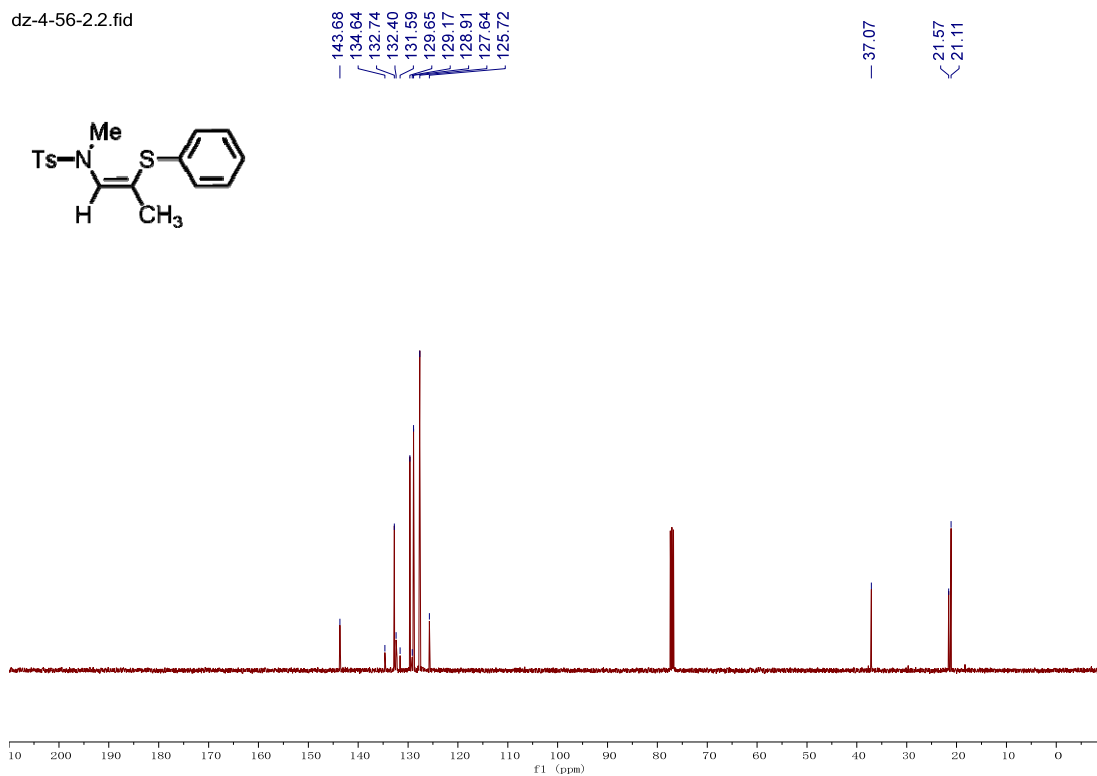

$^{13}\text{C NMR}$  of **6e**

dz-4-56-3-1.10.fid

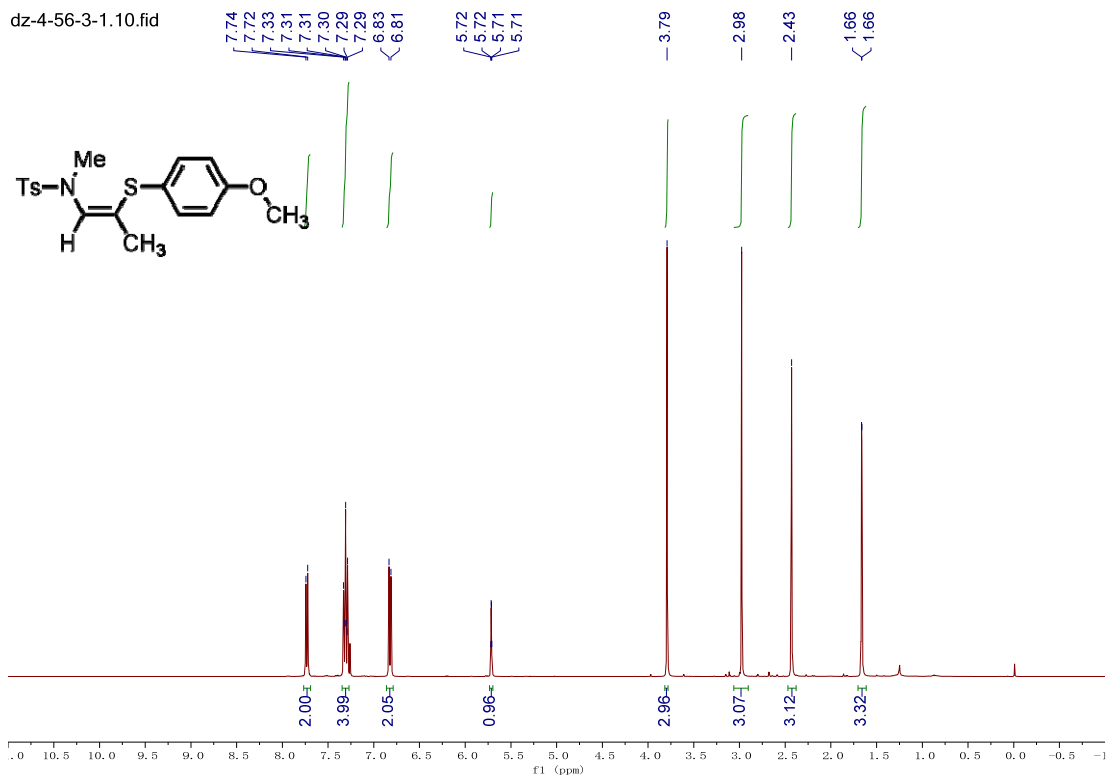

### <sup>1</sup>H NMR of 6f

dz-4-56-3.2.fid

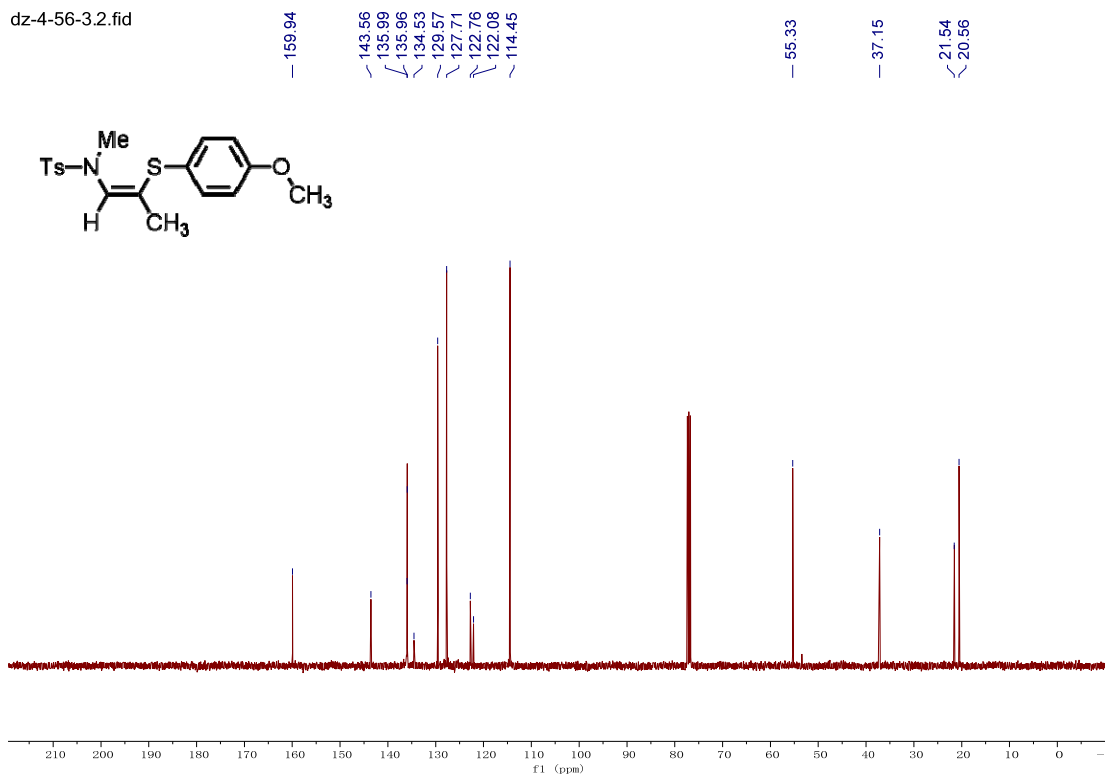

### <sup>13</sup>C NMR of 6f

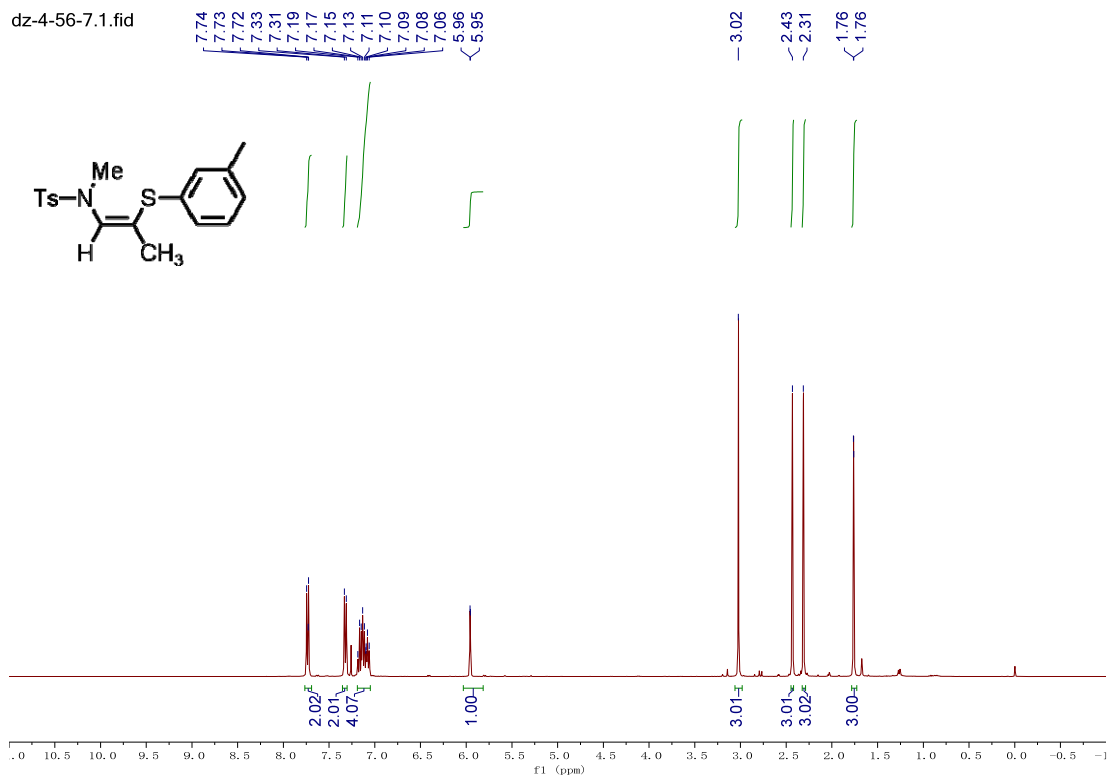

<sup>1</sup>H NMR of **6g**

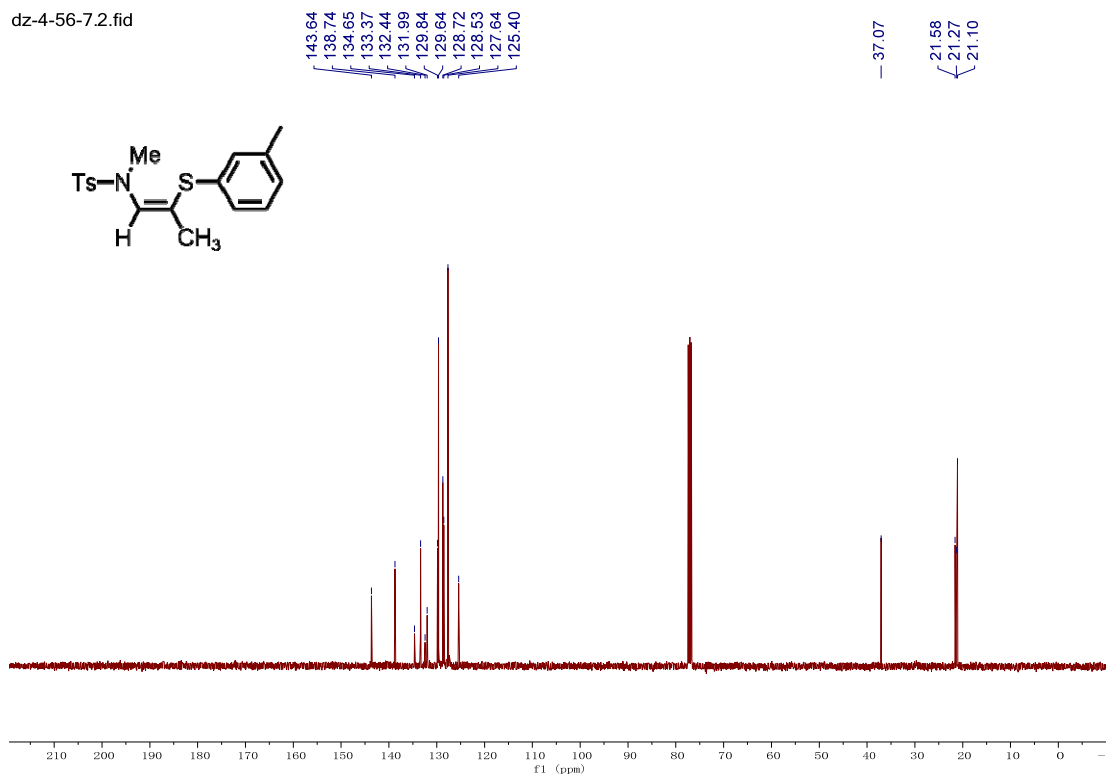

<sup>13</sup>C NMR of **6g**

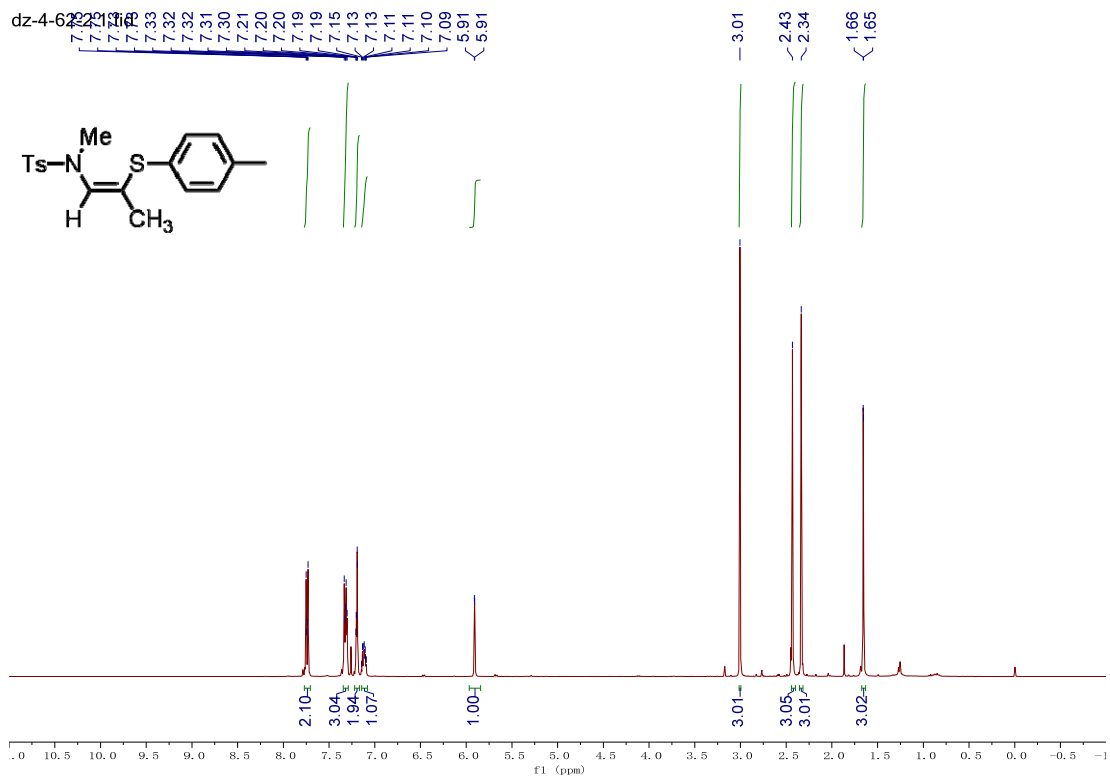

<sup>1</sup>H NMR of **6h**

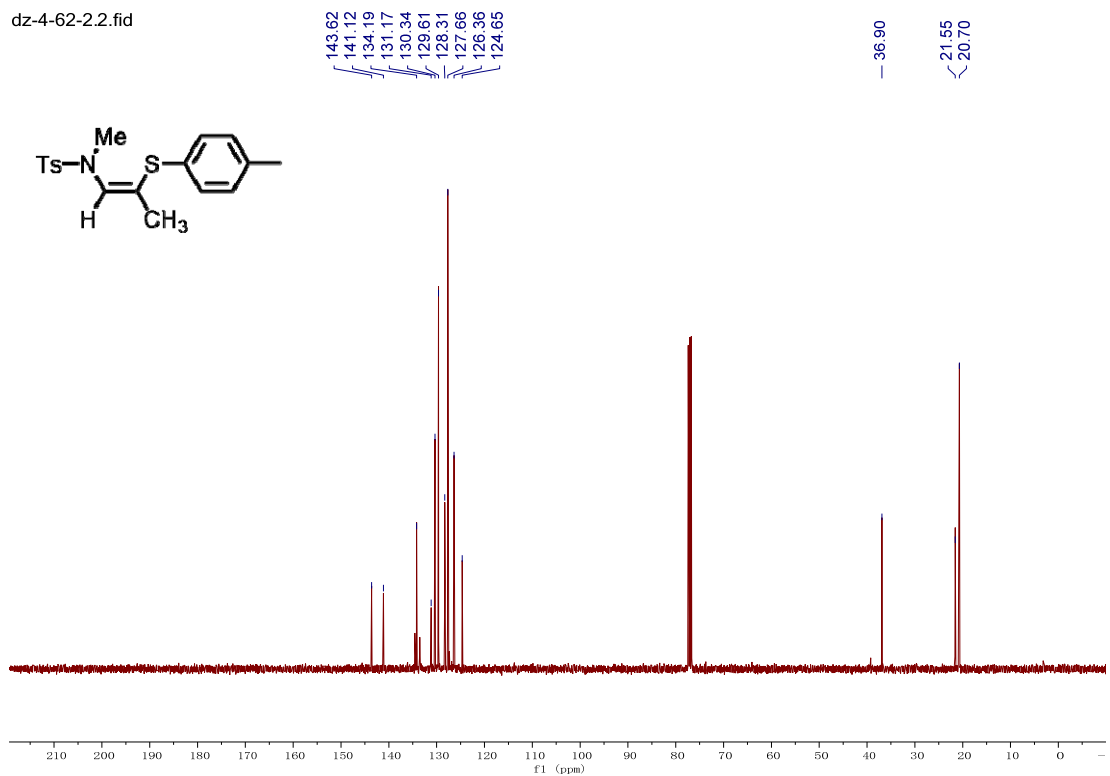

<sup>13</sup>C NMR of **6h**

dz-3-19-2.1.fid

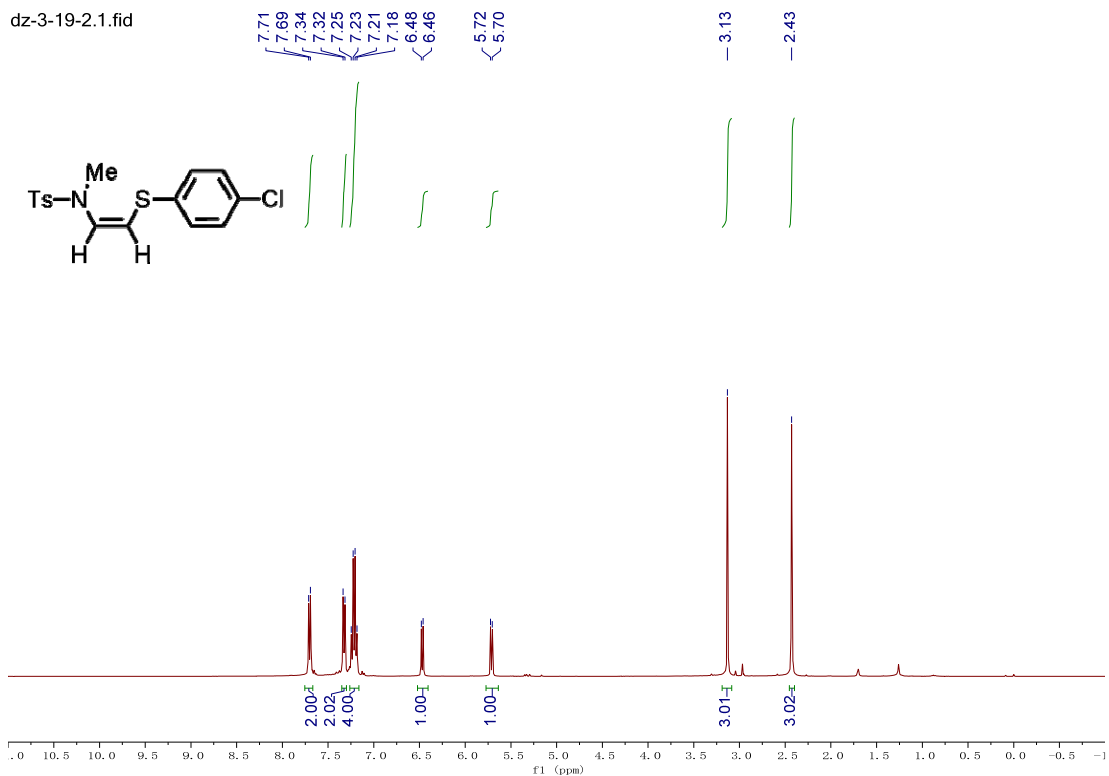

<sup>1</sup>H NMR of **6i**

dz-3-19-2.2.fid

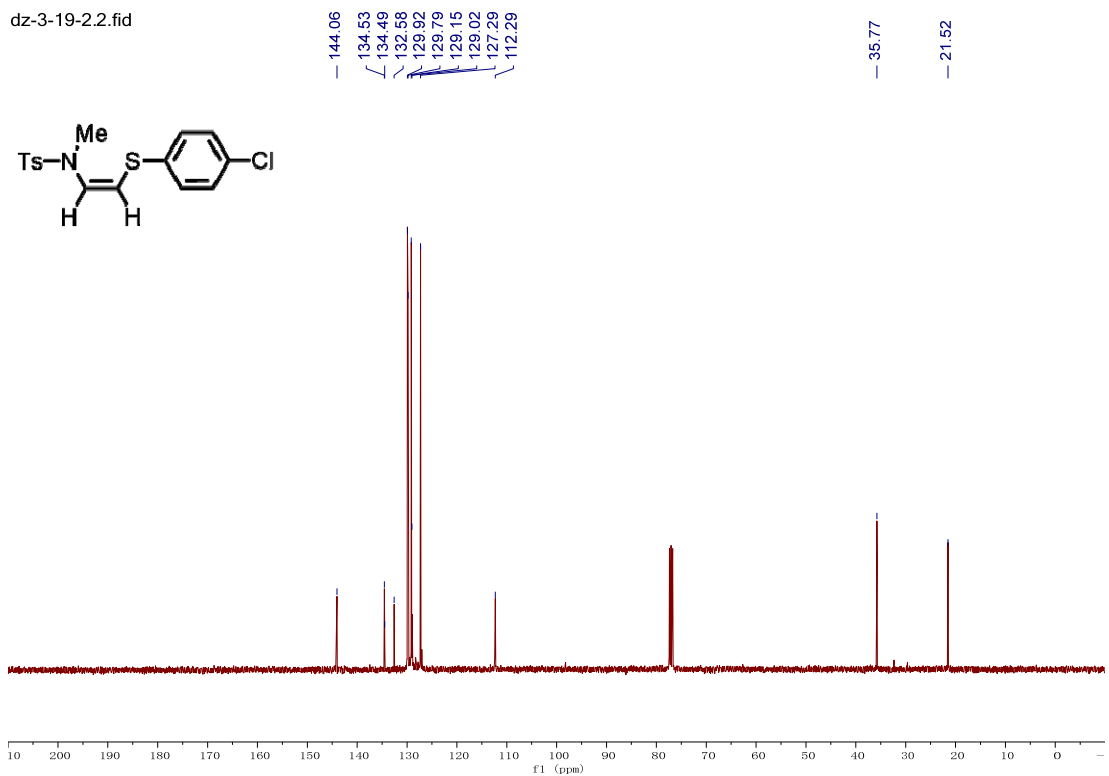

<sup>13</sup>C NMR of **6i**

dz-5-12-1.1.fid

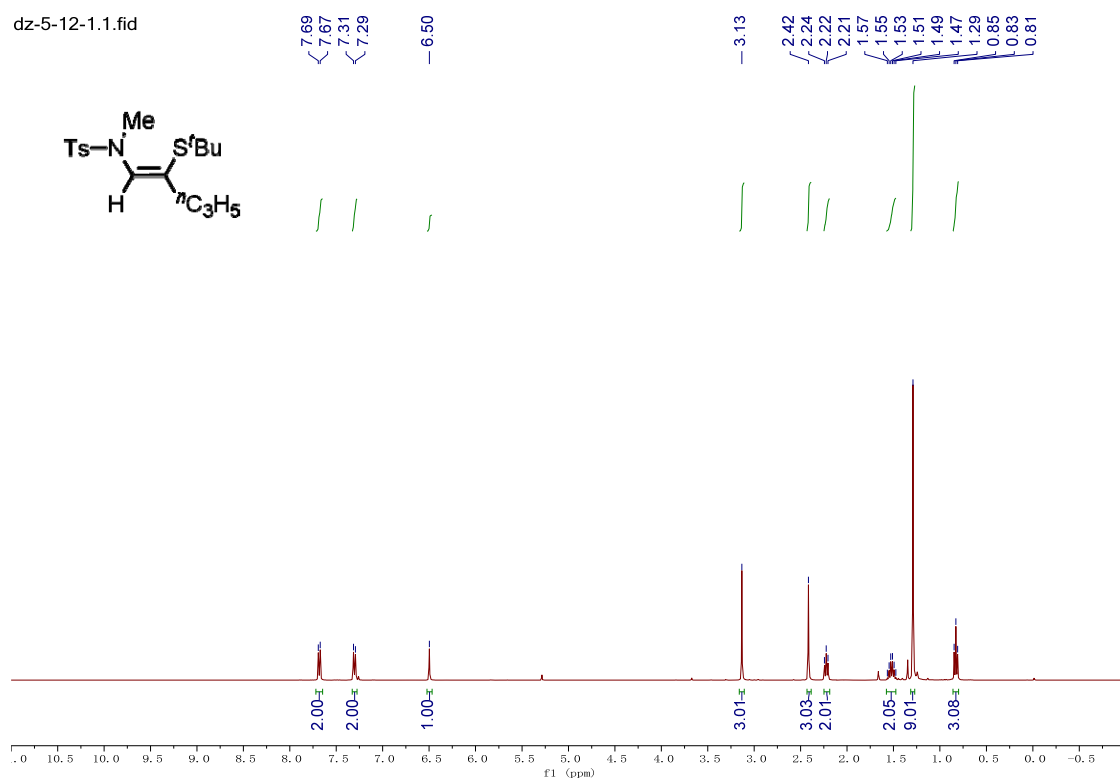

<sup>1</sup>H NMR of **6j**

dz-5-12-1.2.fid

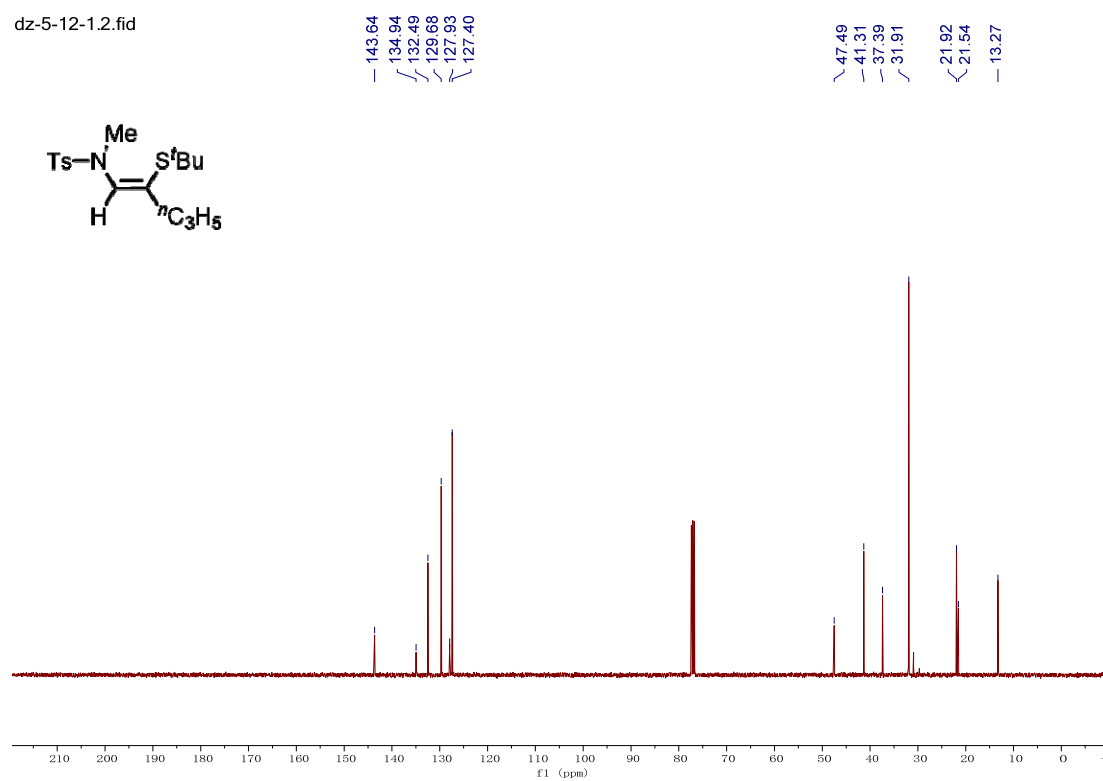

<sup>13</sup>C NMR of **6j**



dz-5-12-2.1.fid

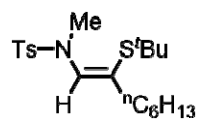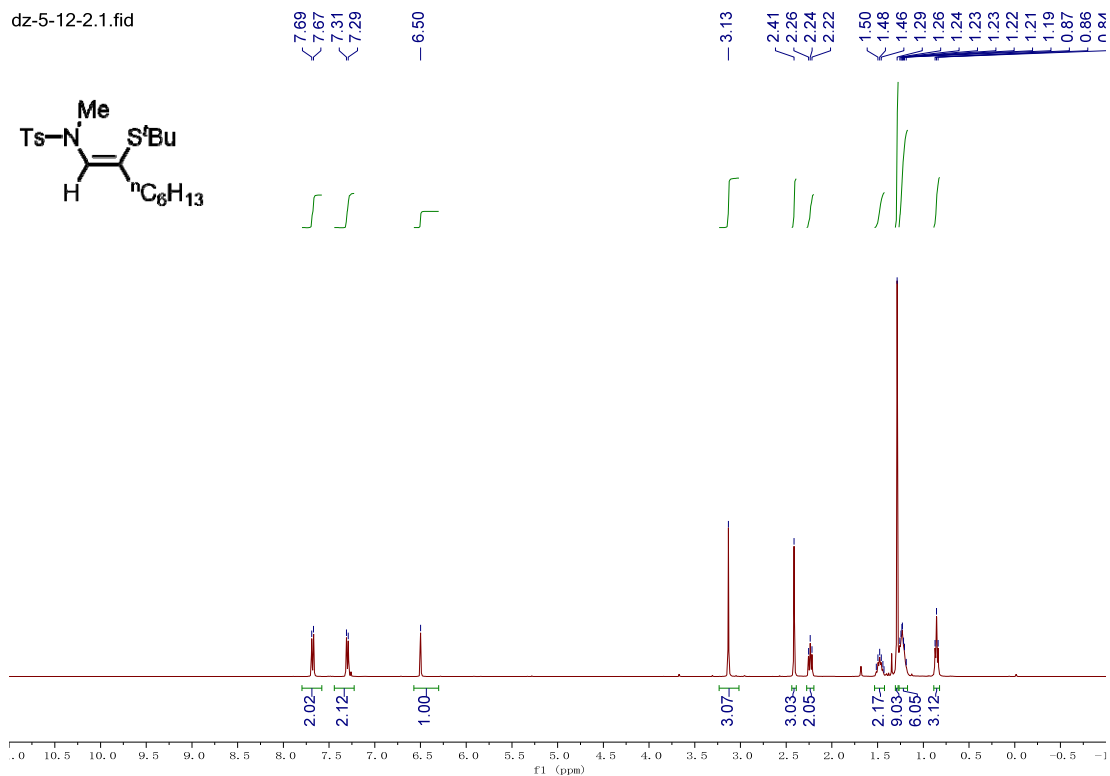

### <sup>1</sup>H NMR of 6k

dz-5-12-2.2.fid

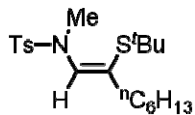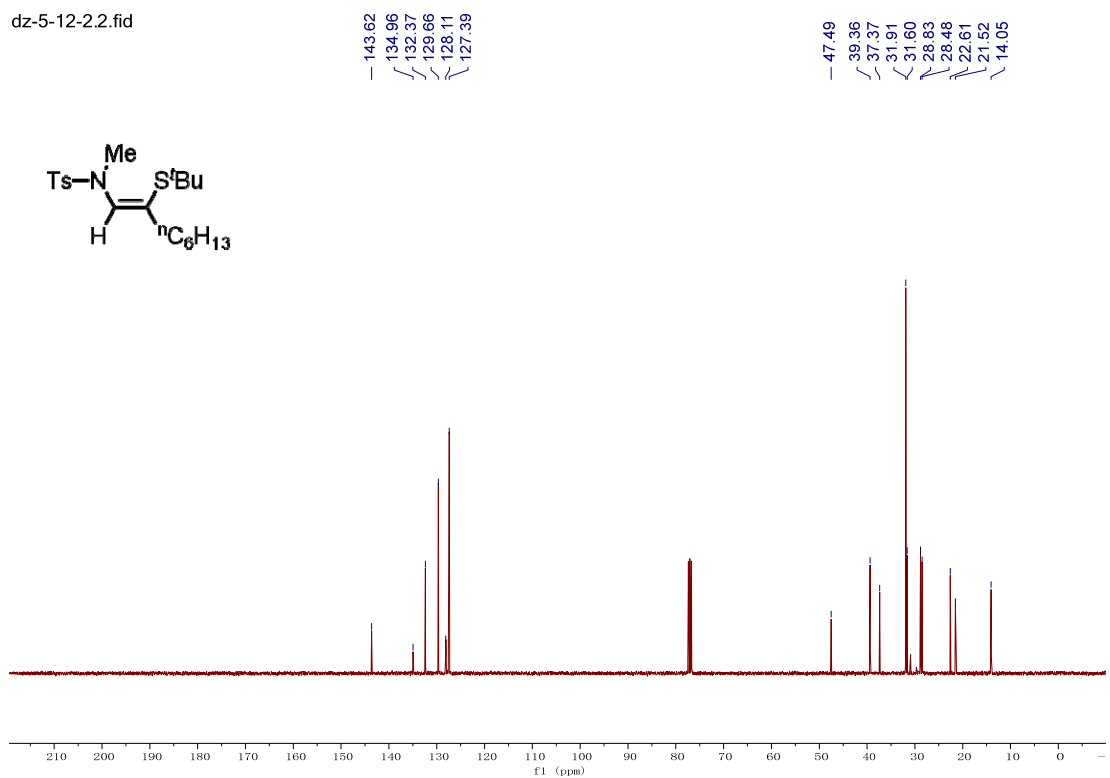

### <sup>13</sup>C NMR of 6k

dz-5-11-1.1.fid

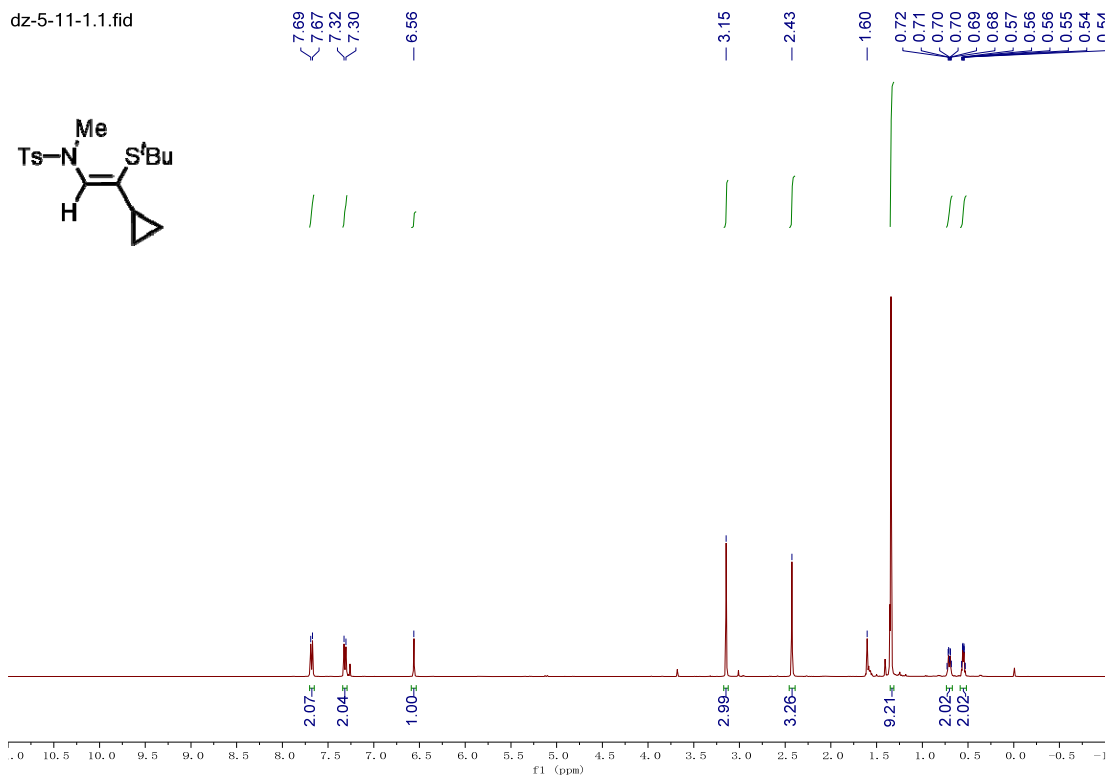

### <sup>1</sup>H NMR of **61**

dz-5-11-1.2.fid

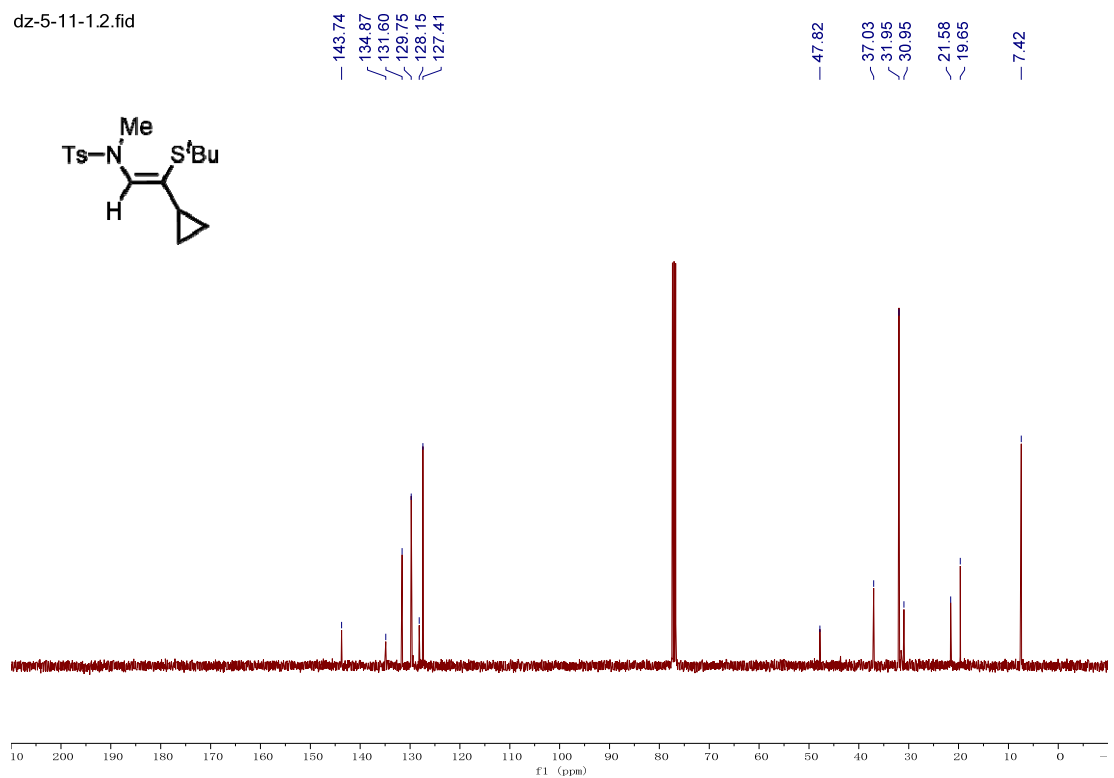

### <sup>13</sup>C NMR of **61**

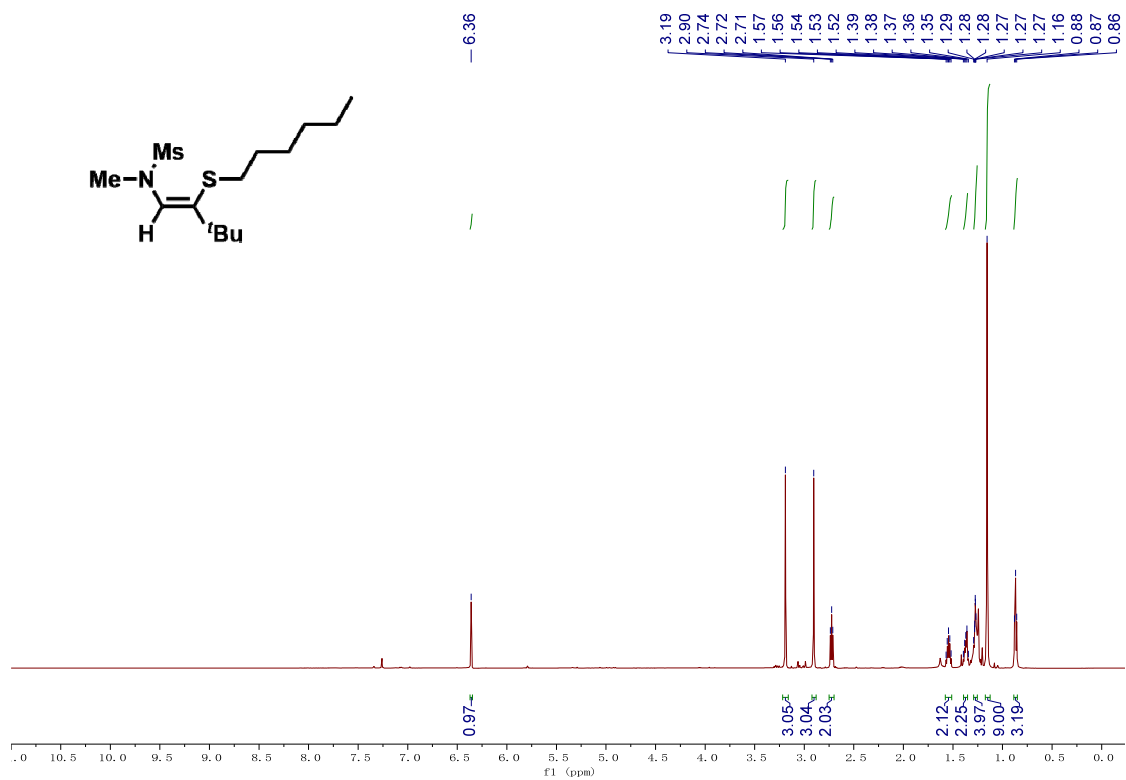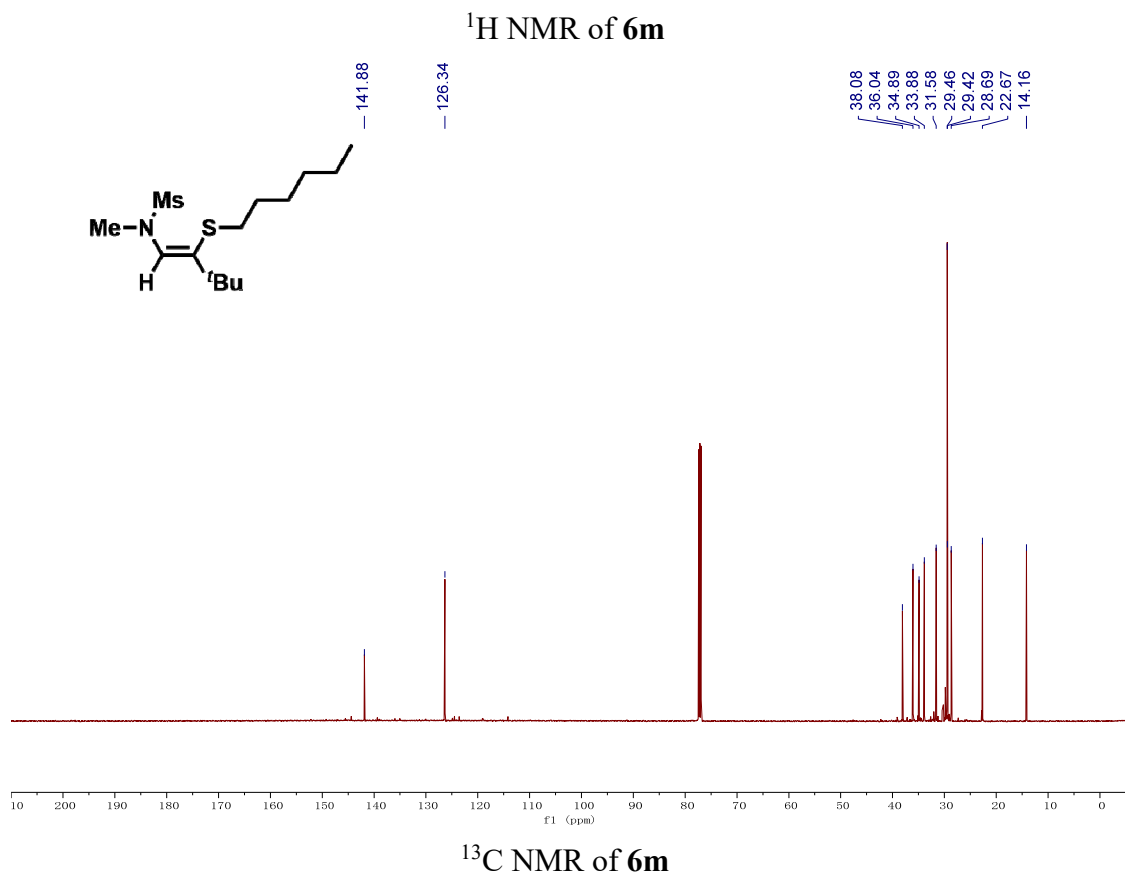

ZZJ-15-52-A. 1.fid

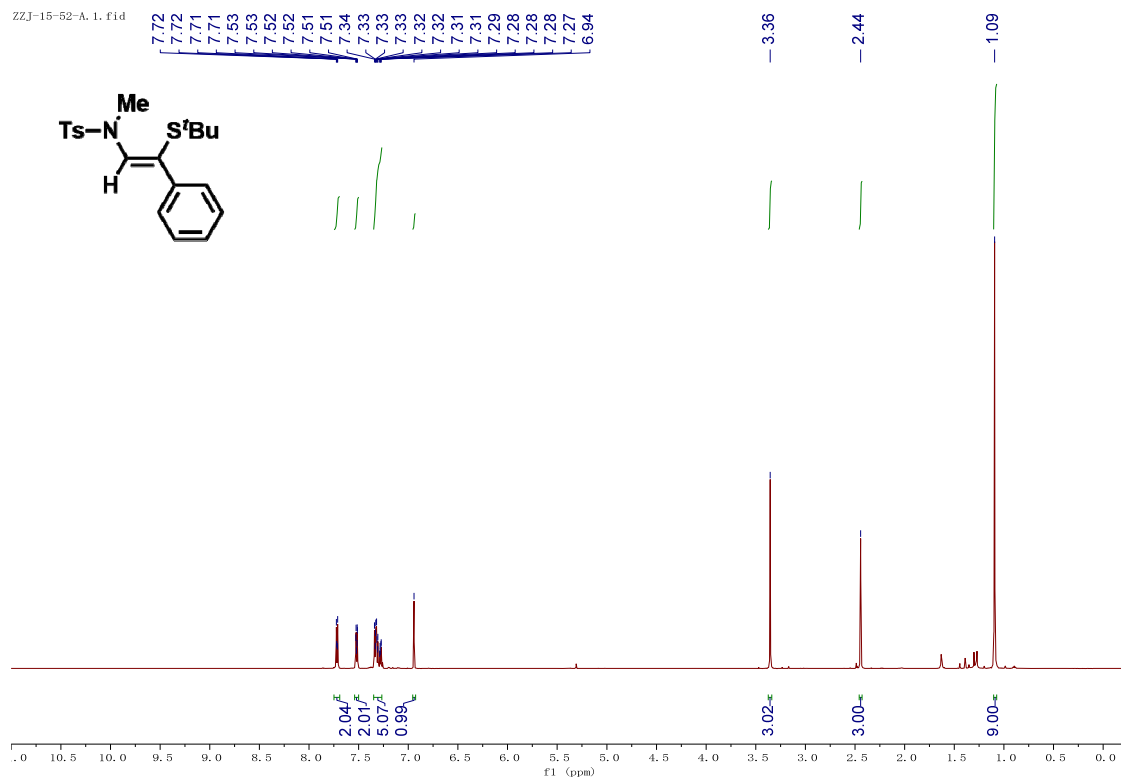

$^1\text{H}$  NMR of **6n**

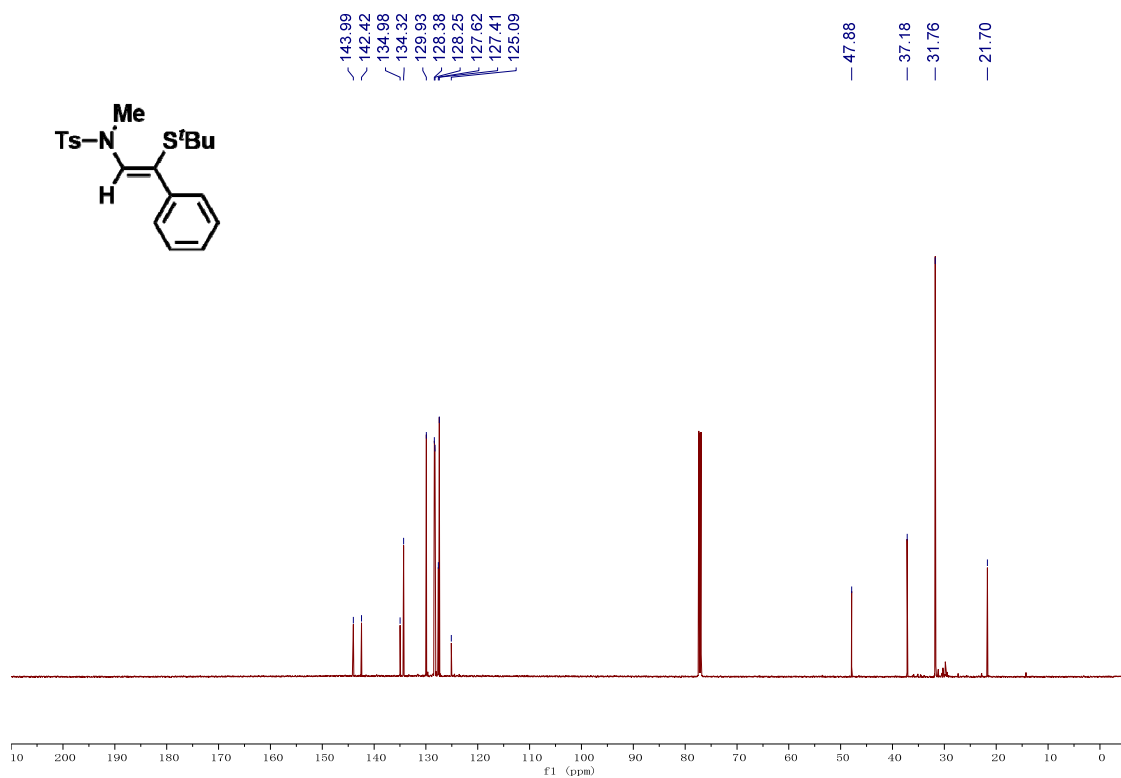

$^{13}\text{C}$  NMR of **6n**

ZZJ-15-52-B.1.fid

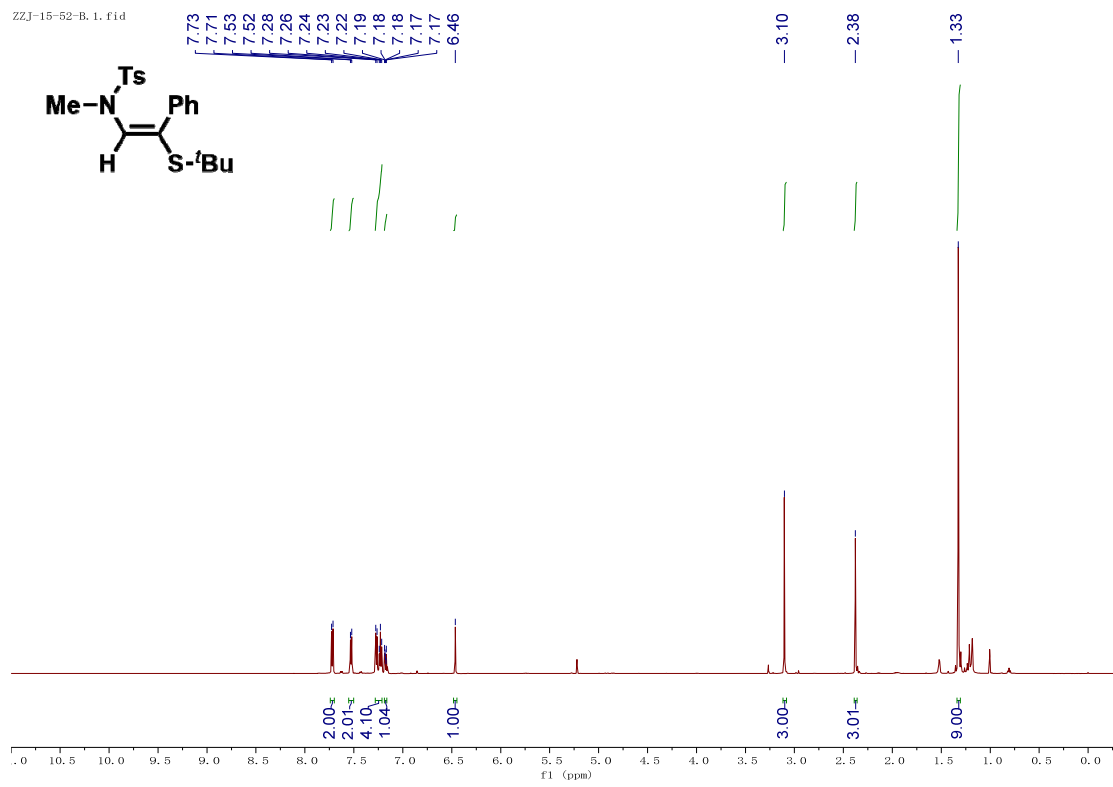

<sup>1</sup>H NMR of **6n'**

ZZJ-15-52-B.2.fid

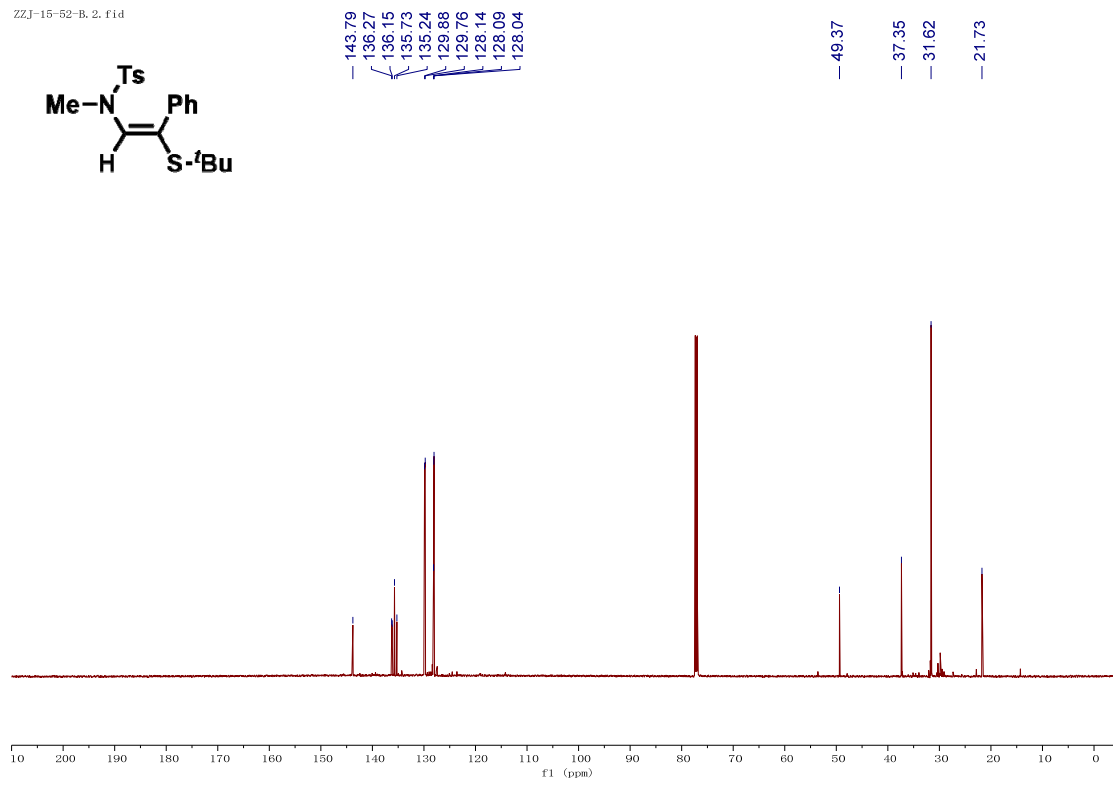

<sup>13</sup>C NMR of **6n'**

DZ-2-76-2.1.fid  
DZ-2-76-2

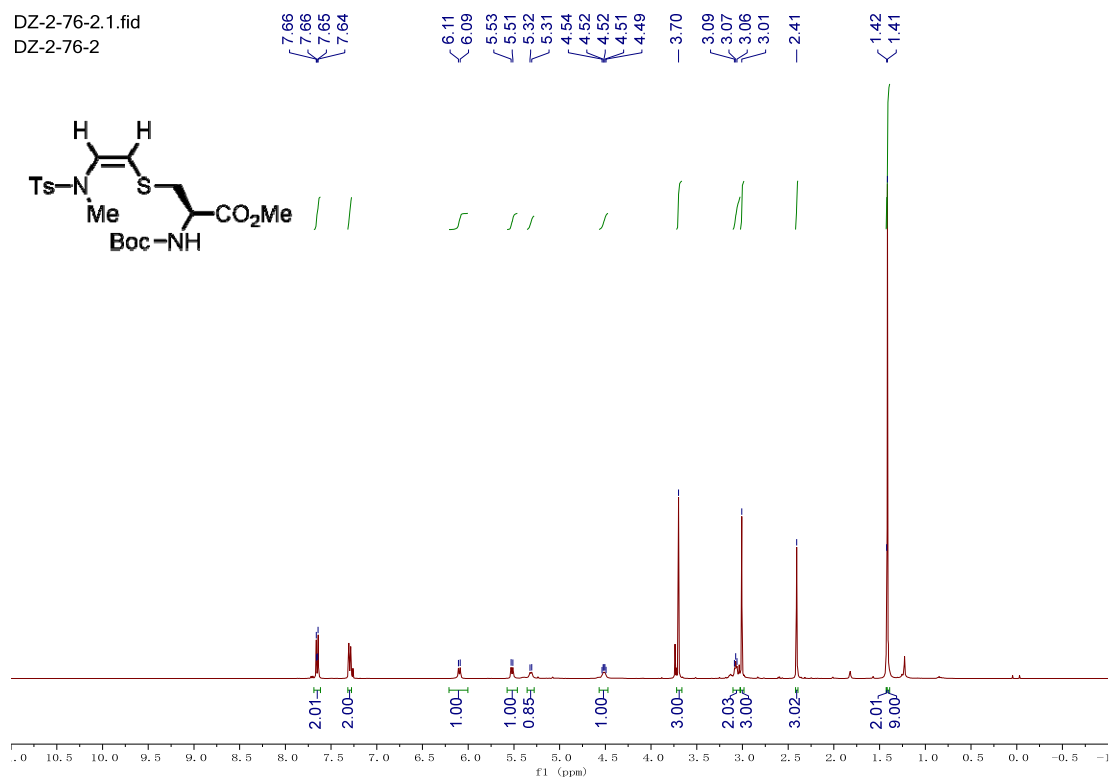

DZ-2-76-2.2.fid  
DZ-2-76-2

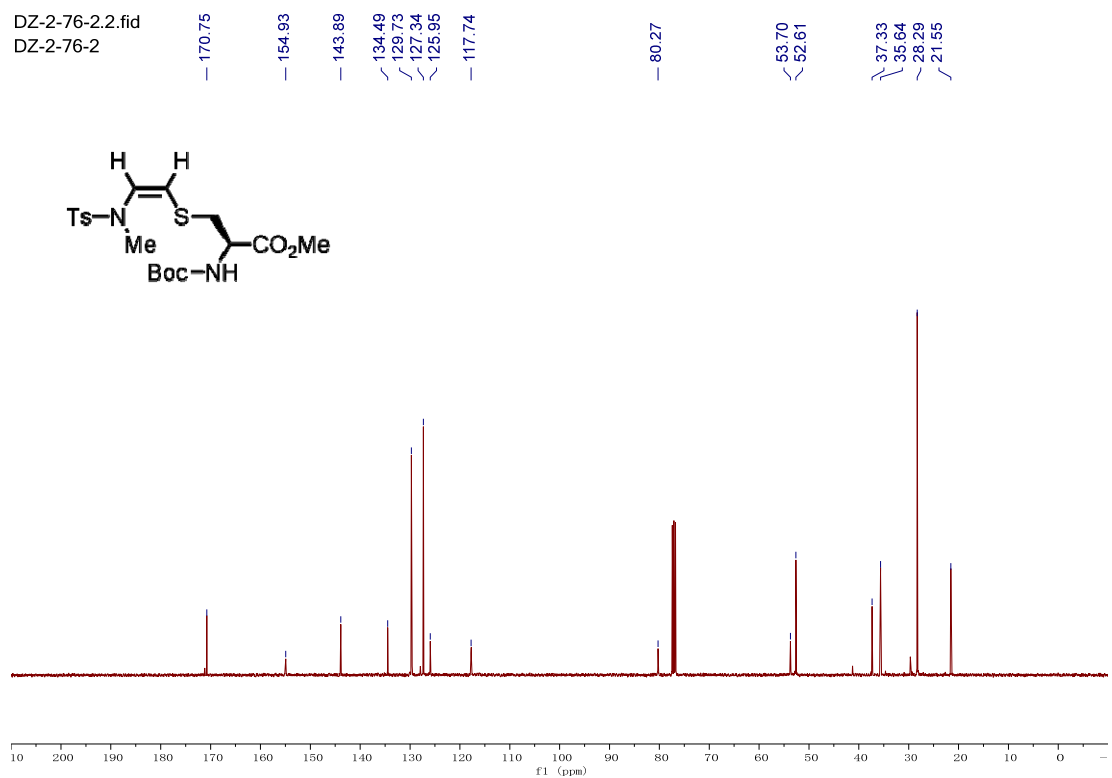

dz-3-25-2.1.fid

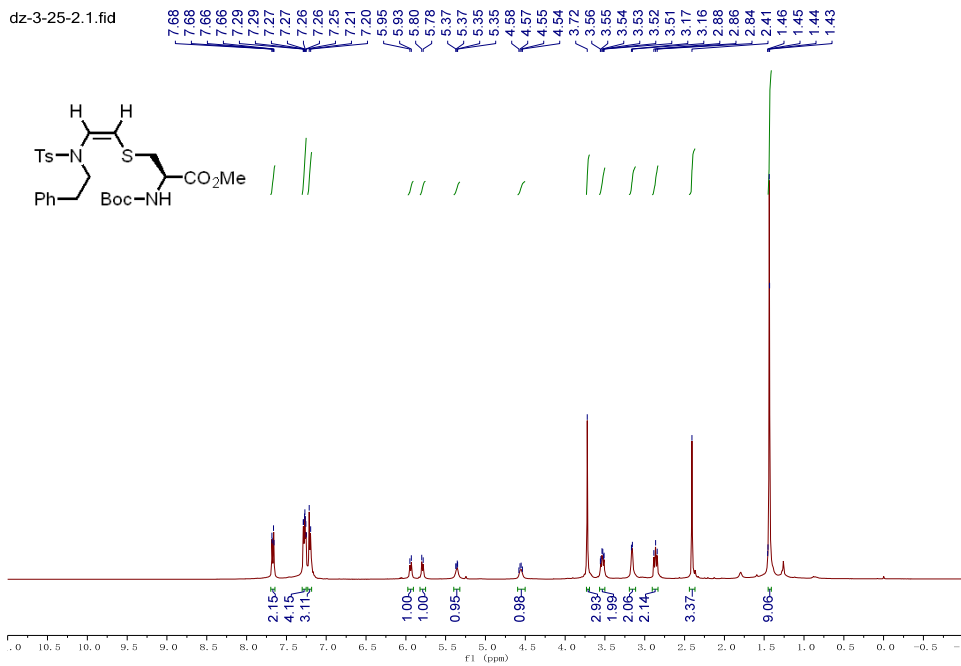

<sup>1</sup>H NMR of 9b

dz-3-25-2.2.fid

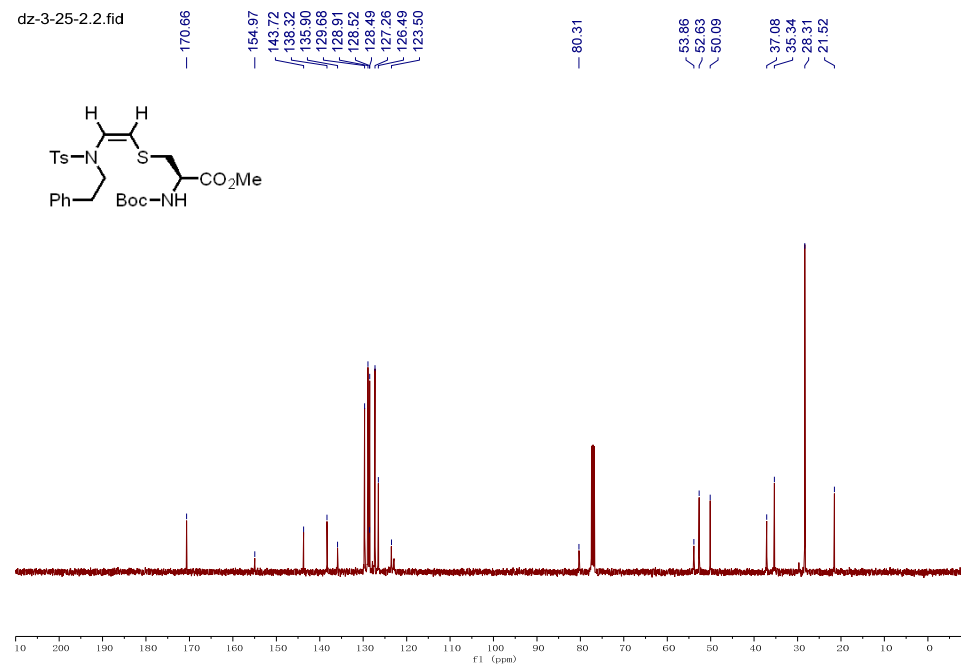

<sup>13</sup>C NMR of 9b

dz-3-25-3.1.fid

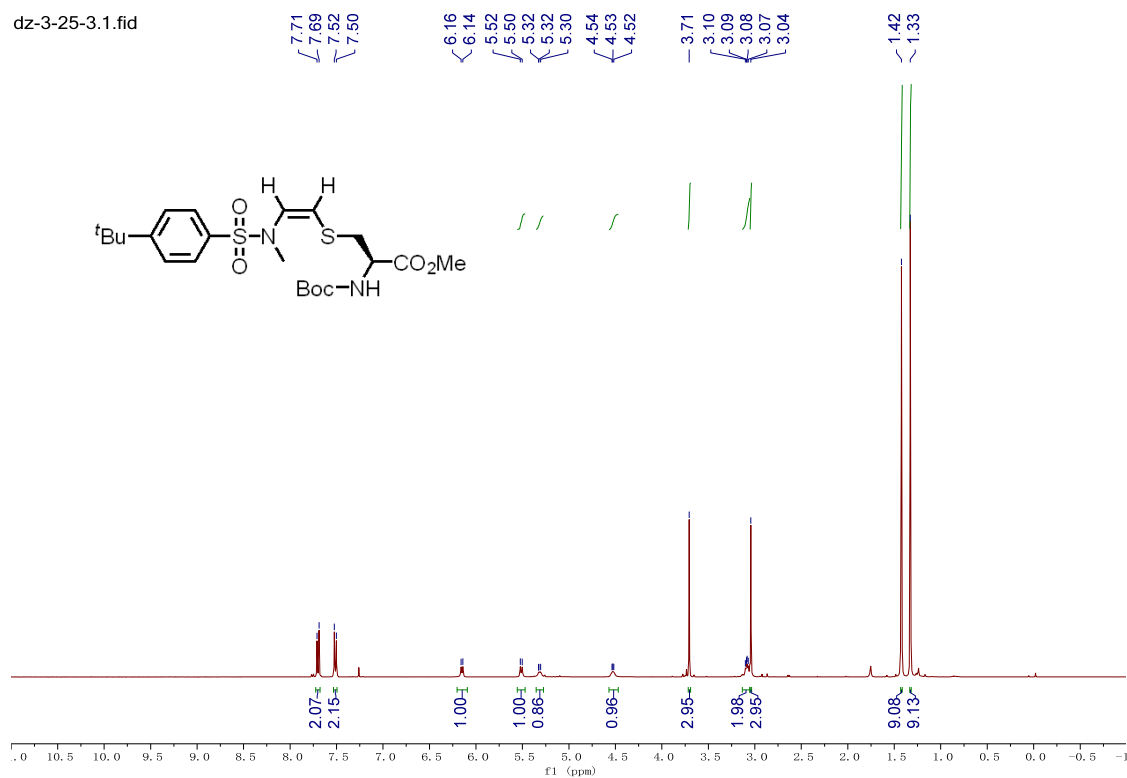

<sup>1</sup>H NMR of **9c**

dz-3-25-3.2.fid

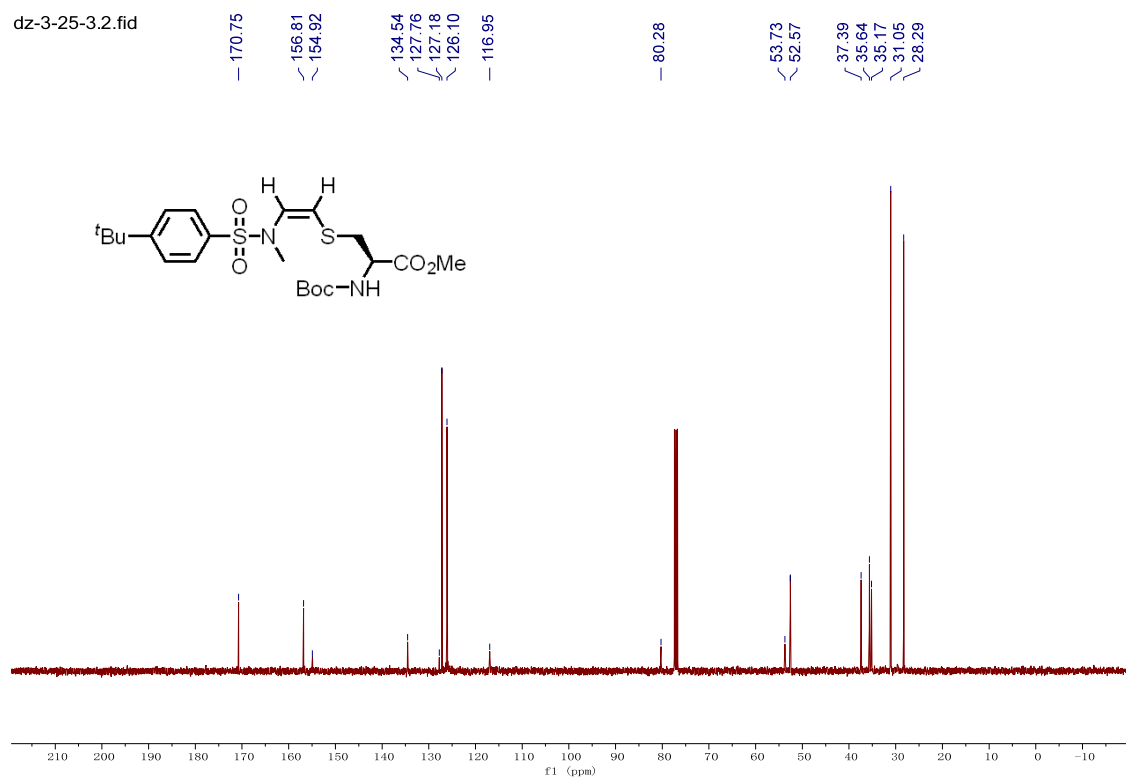

<sup>13</sup>C NMR of **9c**



dz-3-32-1.11.fid

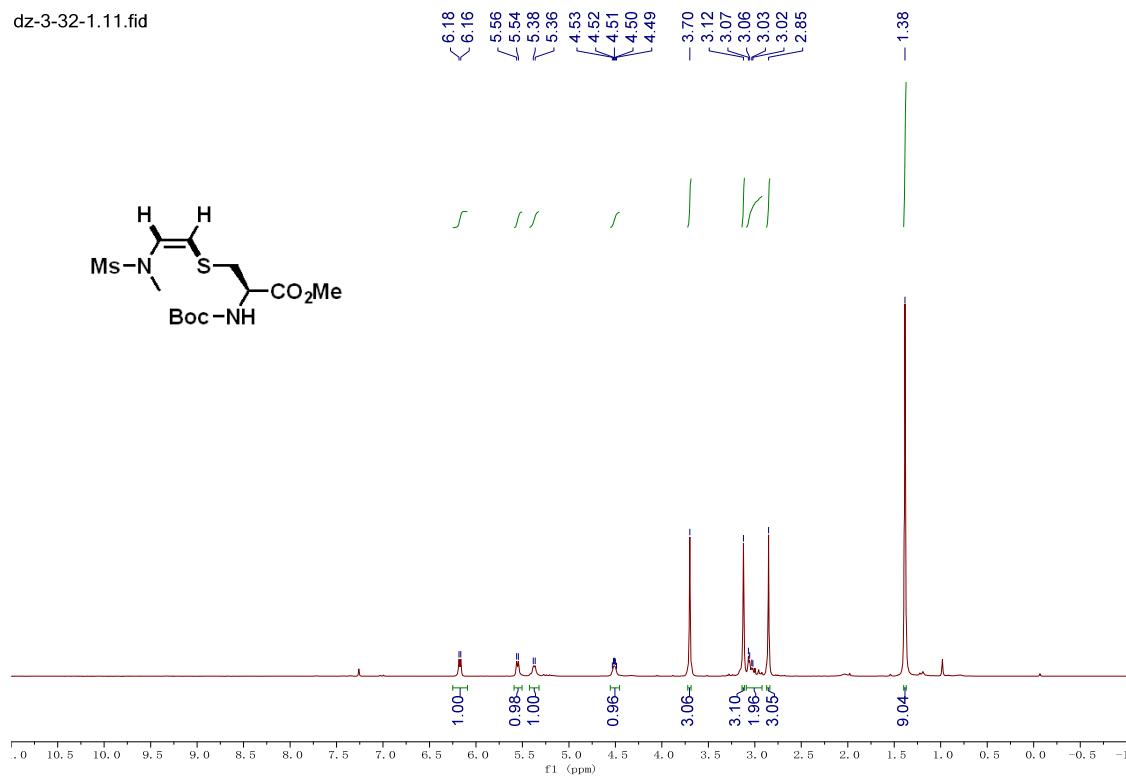

<sup>1</sup>H NMR of 9d

dz-3-32-1.12.fid

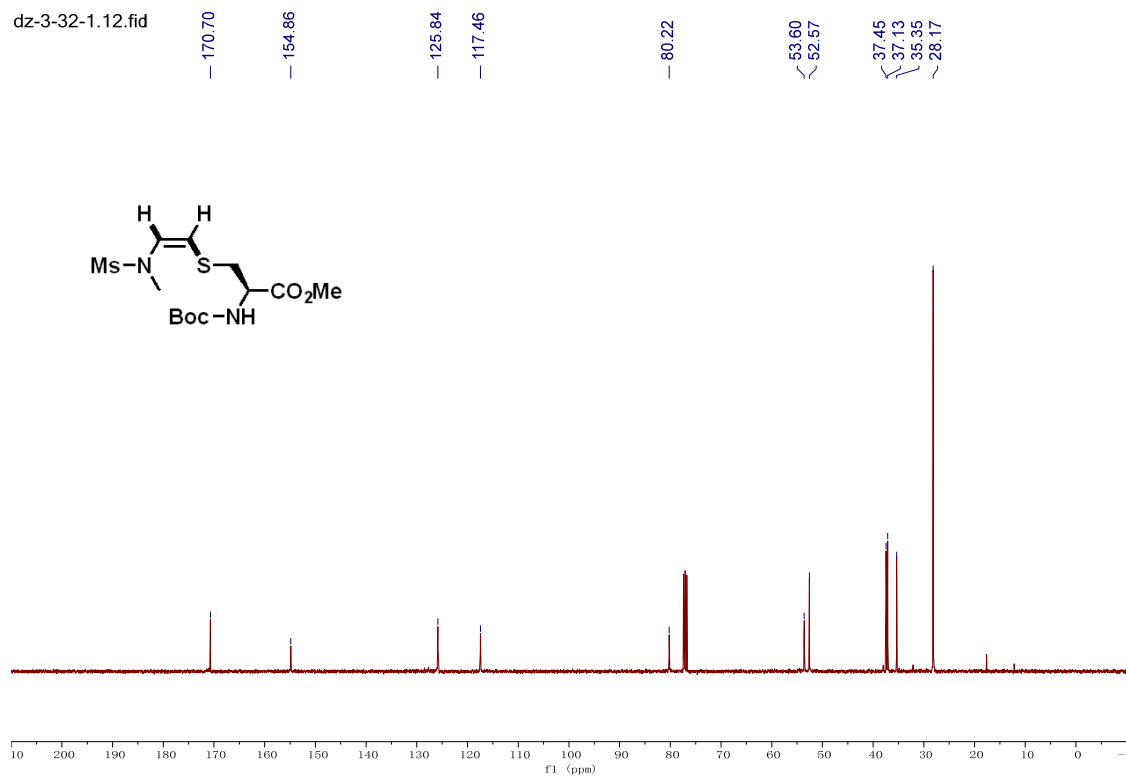

<sup>13</sup>C NMR of 9d

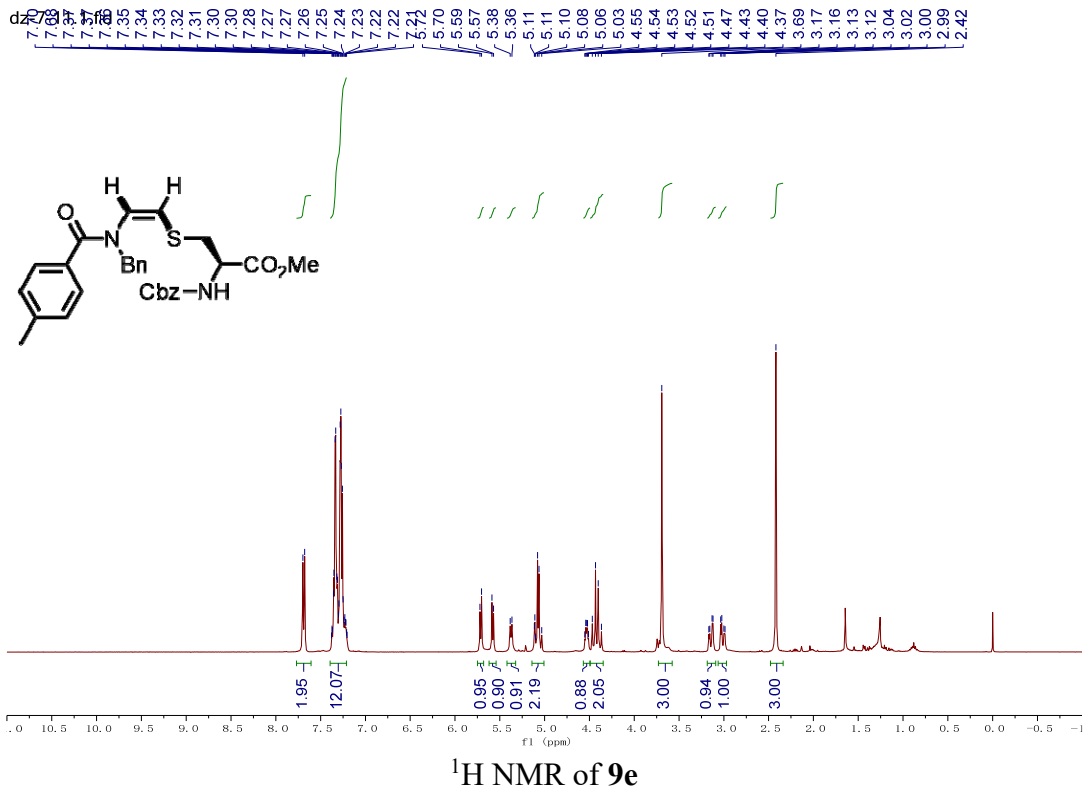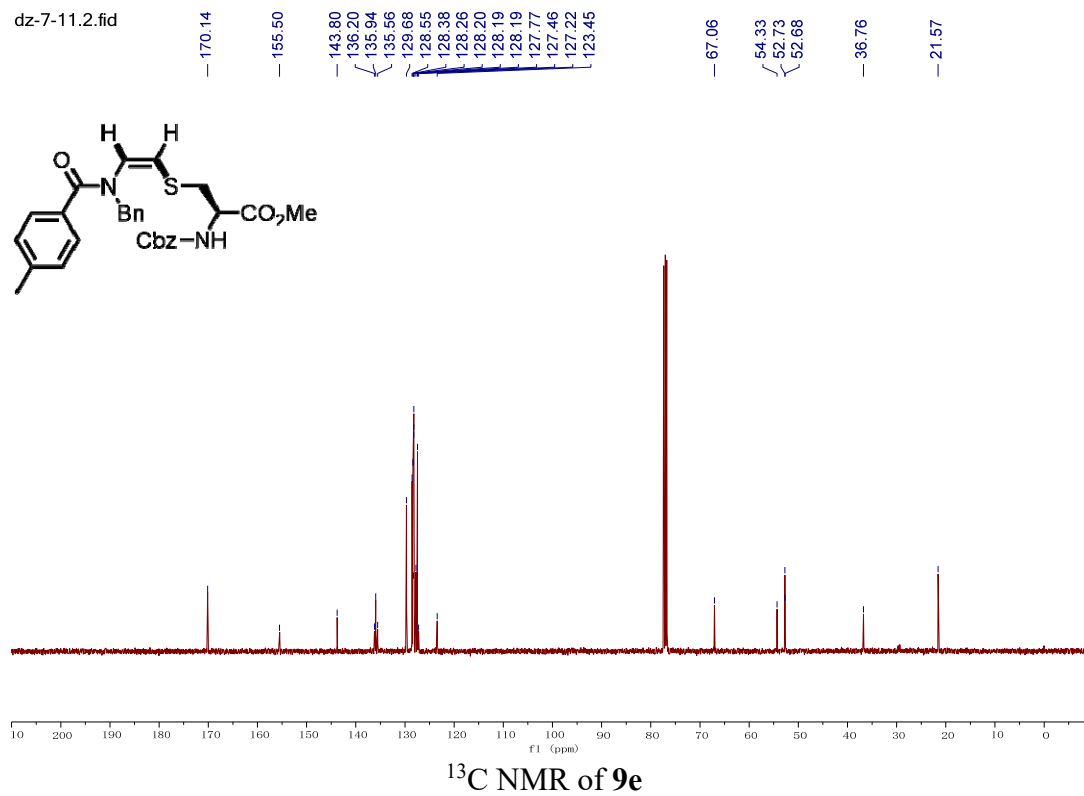

dz-3-59.1.fid

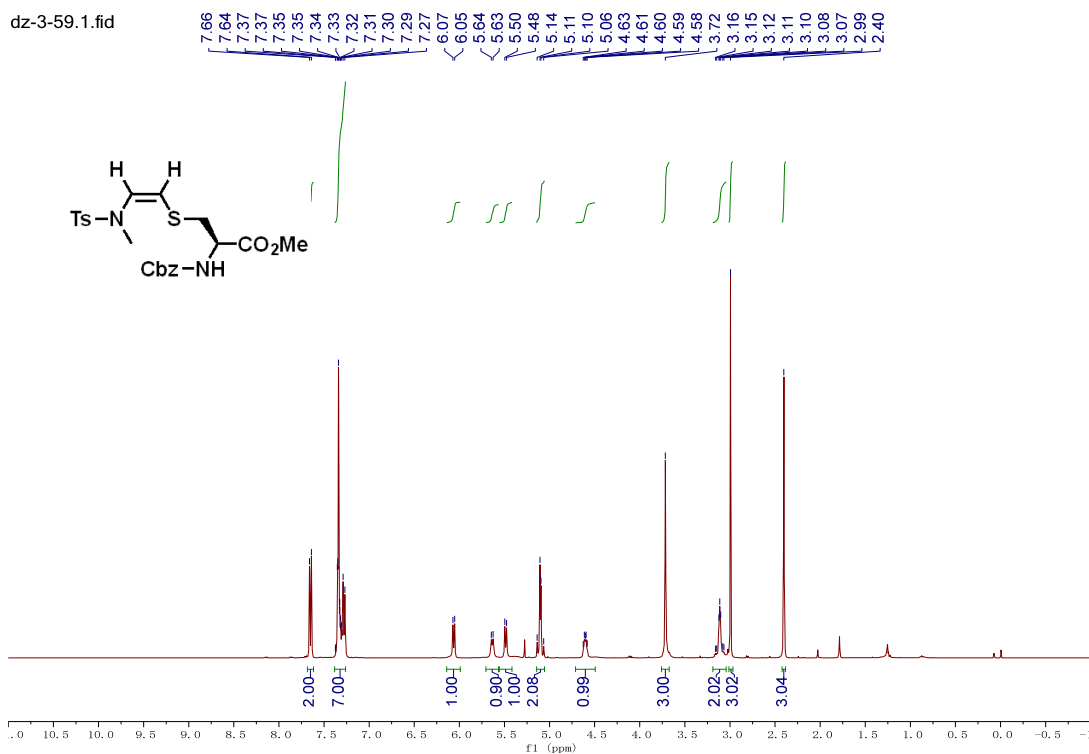

<sup>1</sup>H NMR of 9f

dz-3-59.2.fid

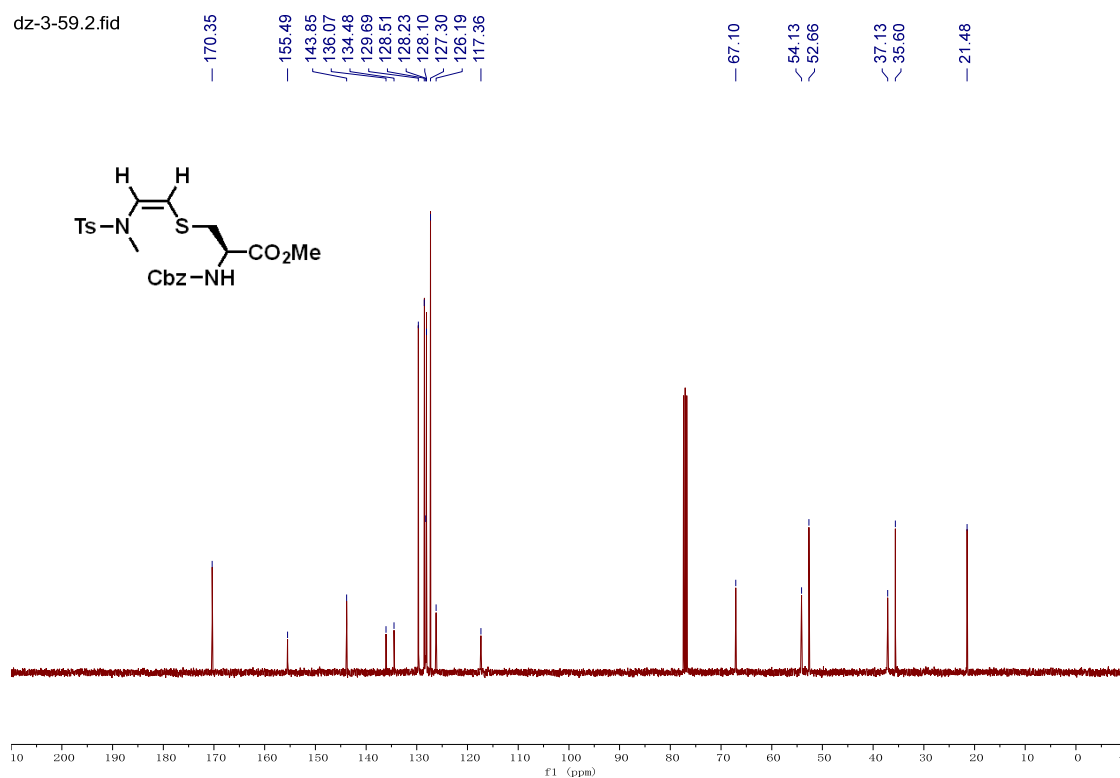

<sup>13</sup>C NMR of 9f

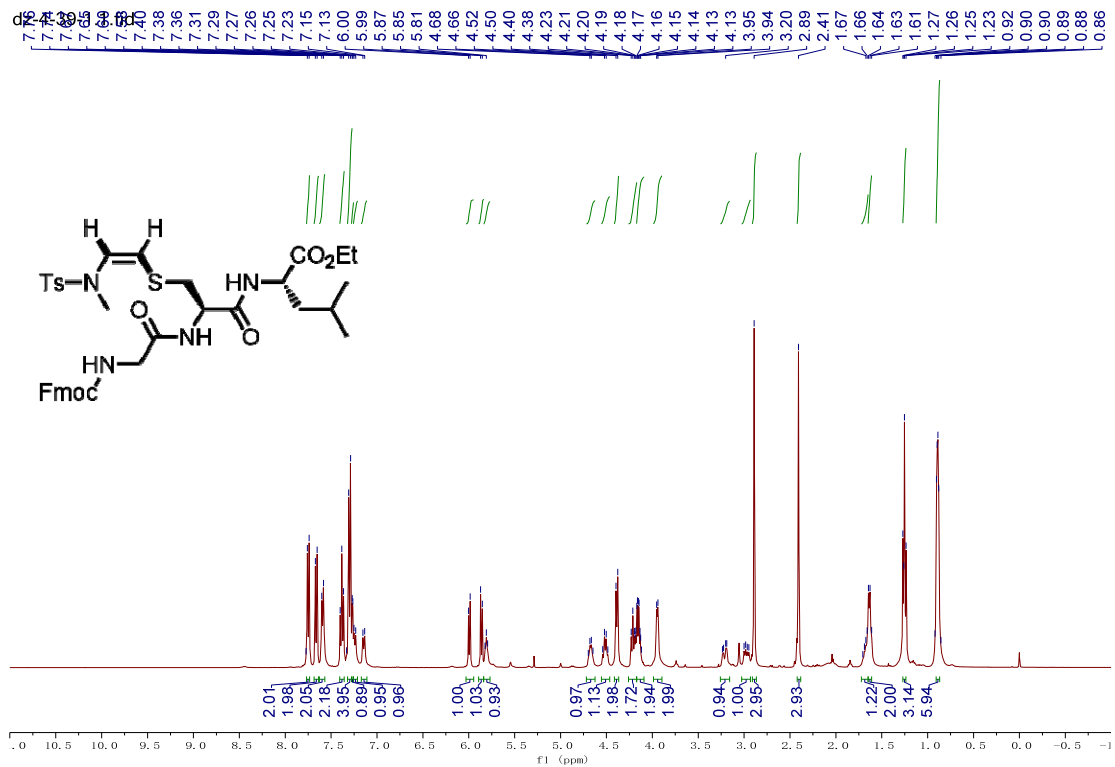

dz-4-39-1.2.fid

172.27  
169.38  
169.25  
156.75  
144.06  
143.78  
141.27  
133.61  
129.83  
127.82  
127.74  
127.55  
127.11  
126.50  
125.13  
123.28  
119.98  
67.35  
61.37  
53.17  
51.51  
47.07  
44.53  
40.75  
36.48  
36.05  
24.79  
22.75  
21.76  
21.55  
14.17

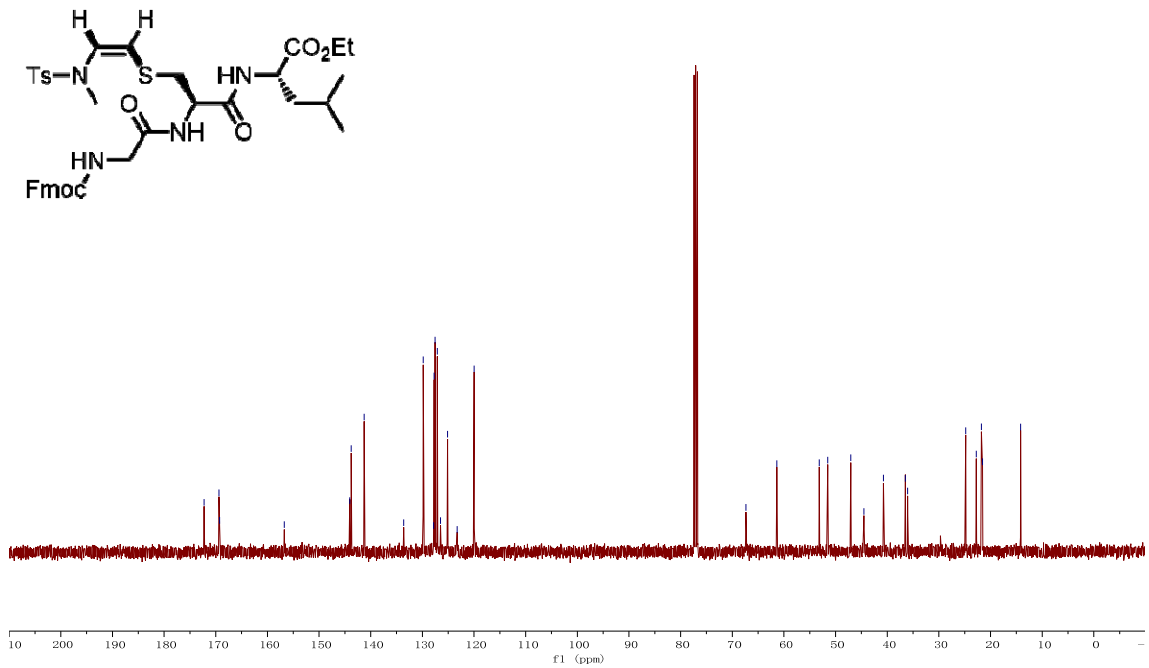

dz-4-65-1.1.fid

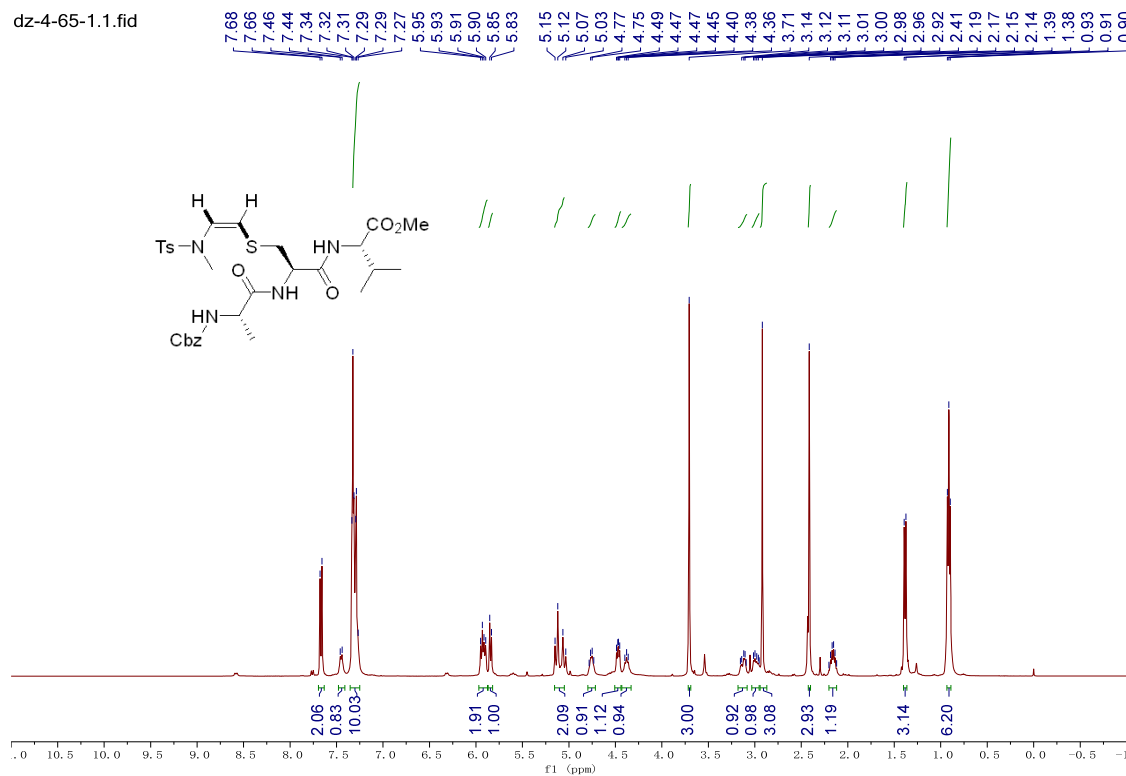

<sup>1</sup>H NMR of 9h

dz-4-65-1.2.fid

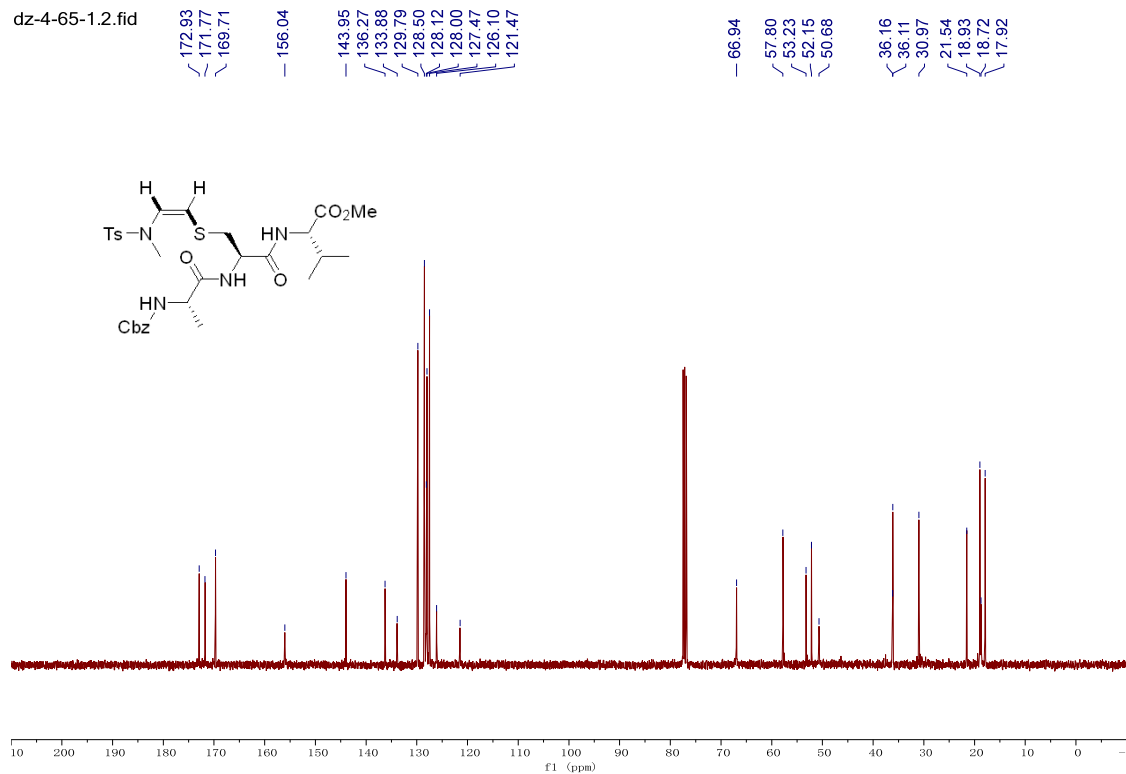

<sup>13</sup>C NMR of 9h

dz-8-22-2.1.fid

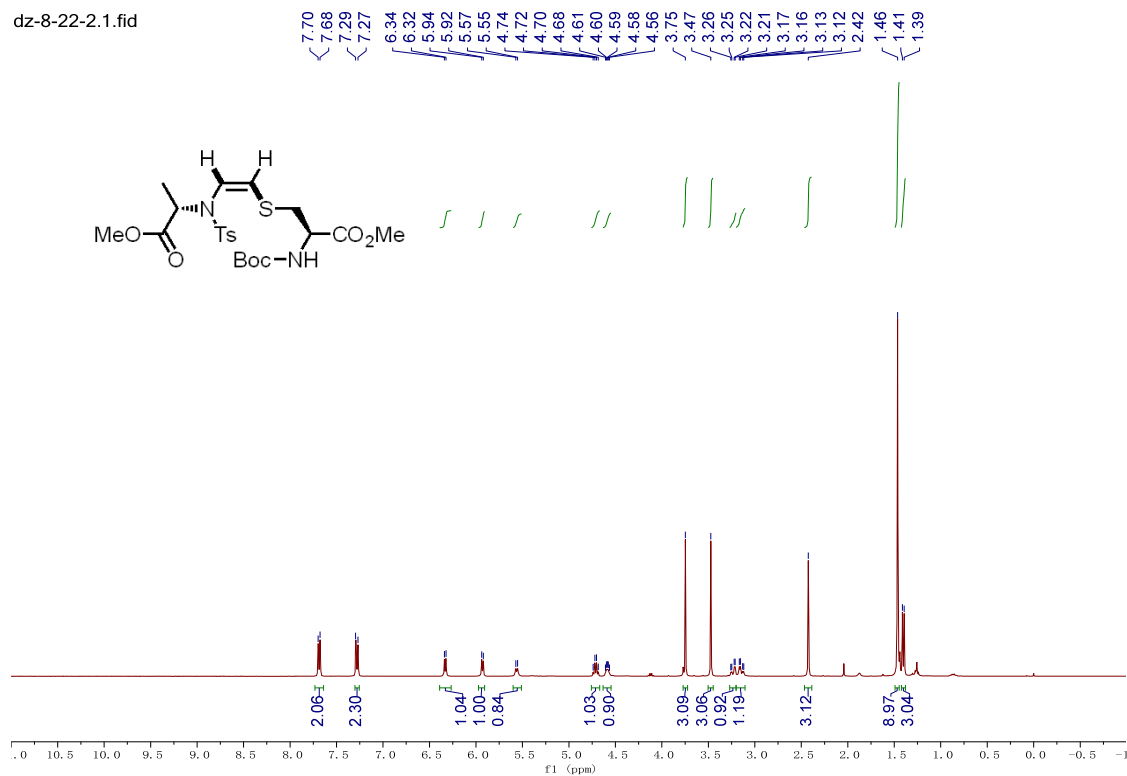

<sup>1</sup>H NMR of 9i

dz-8-22-2.2.fid

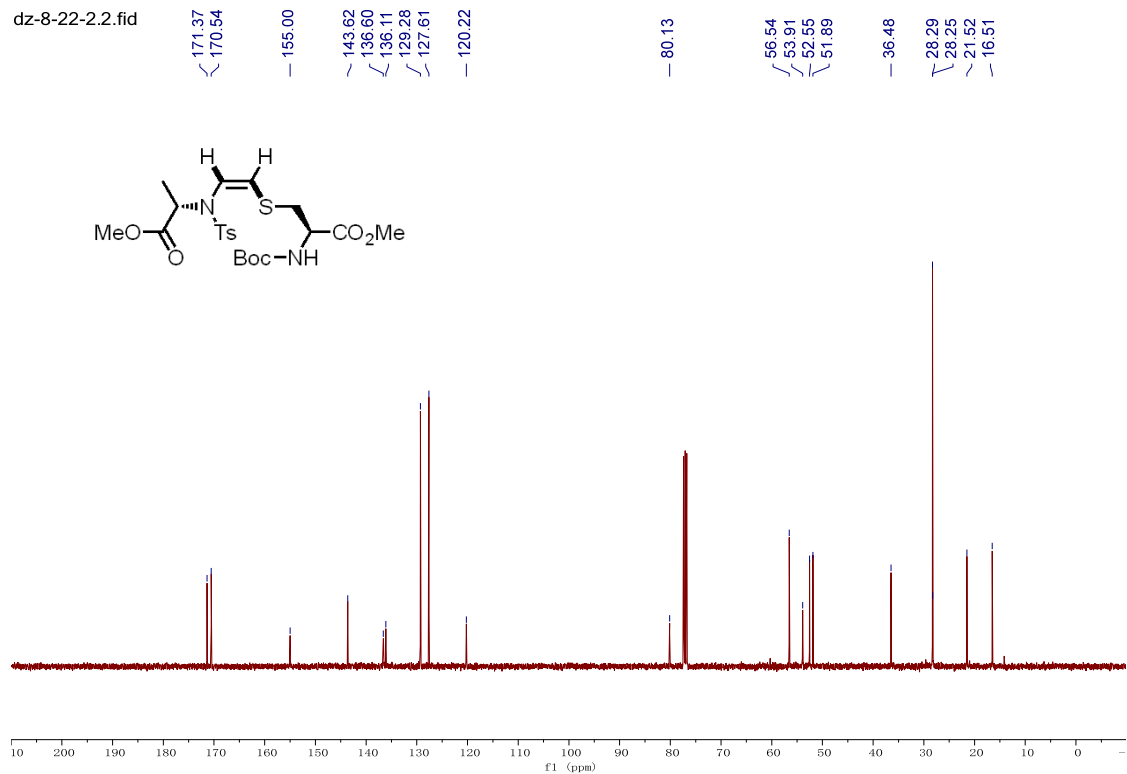

<sup>13</sup>C NMR of 9i

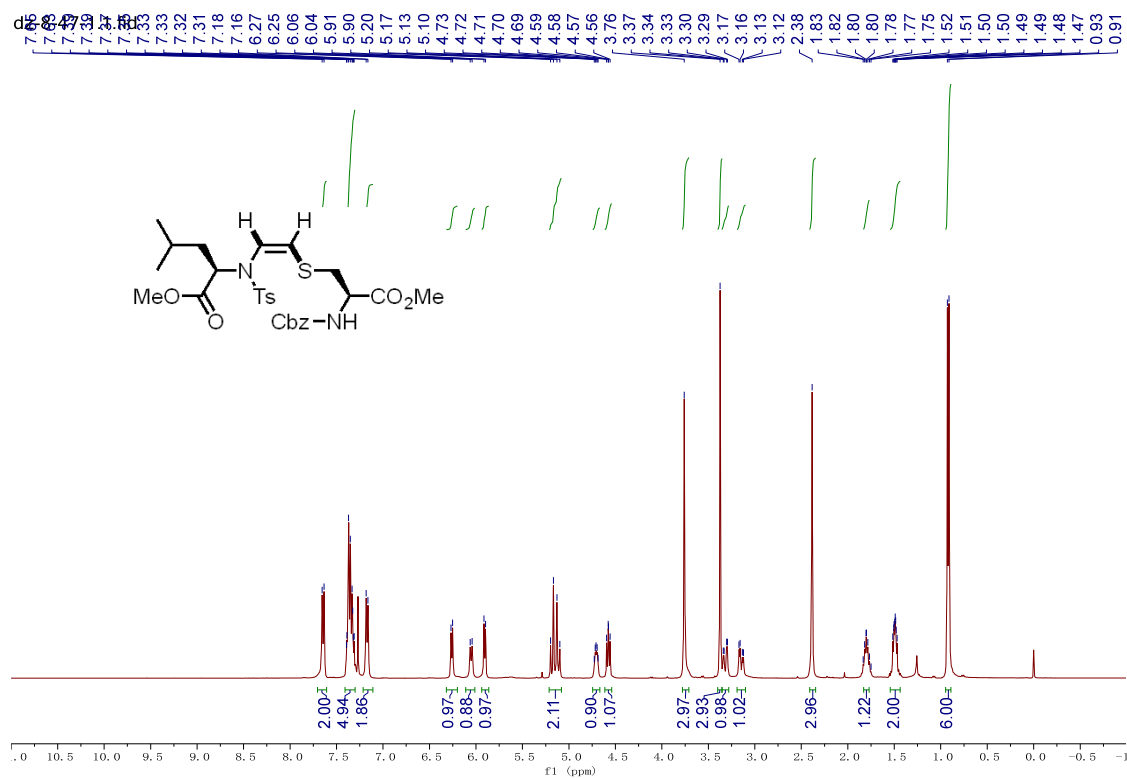

<sup>1</sup>H NMR of 9j

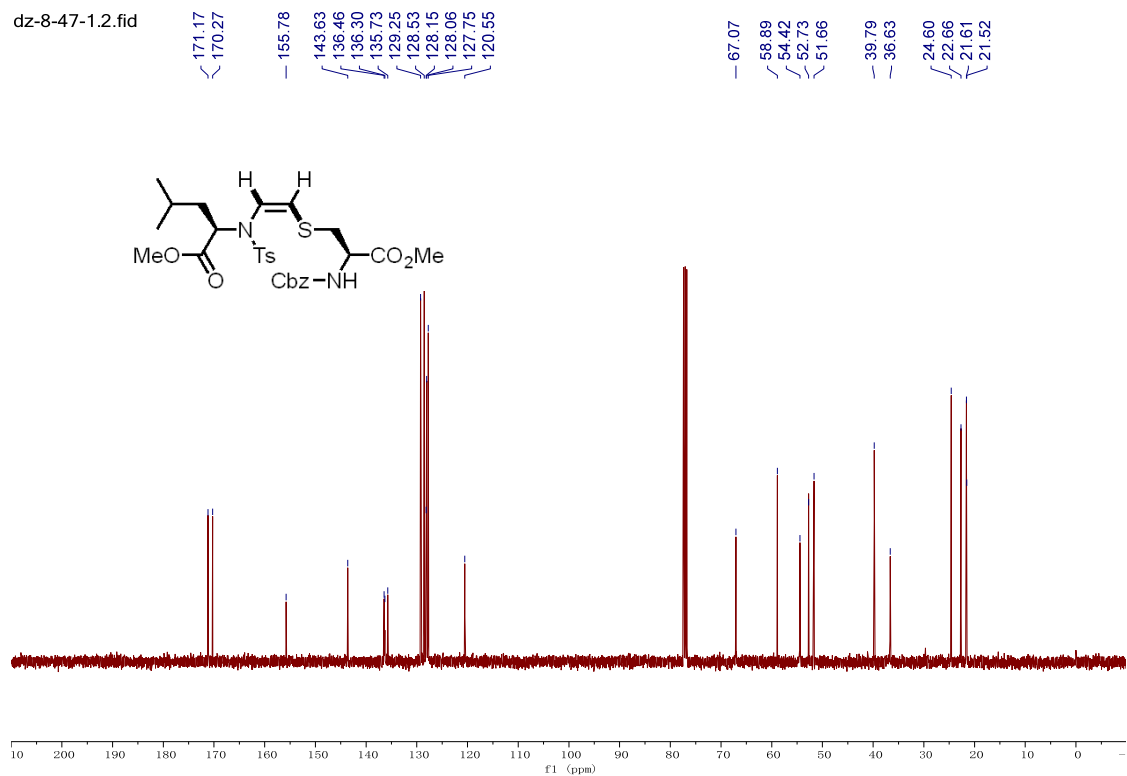

<sup>13</sup>C NMR of 9j

dz-8-27.1.fid

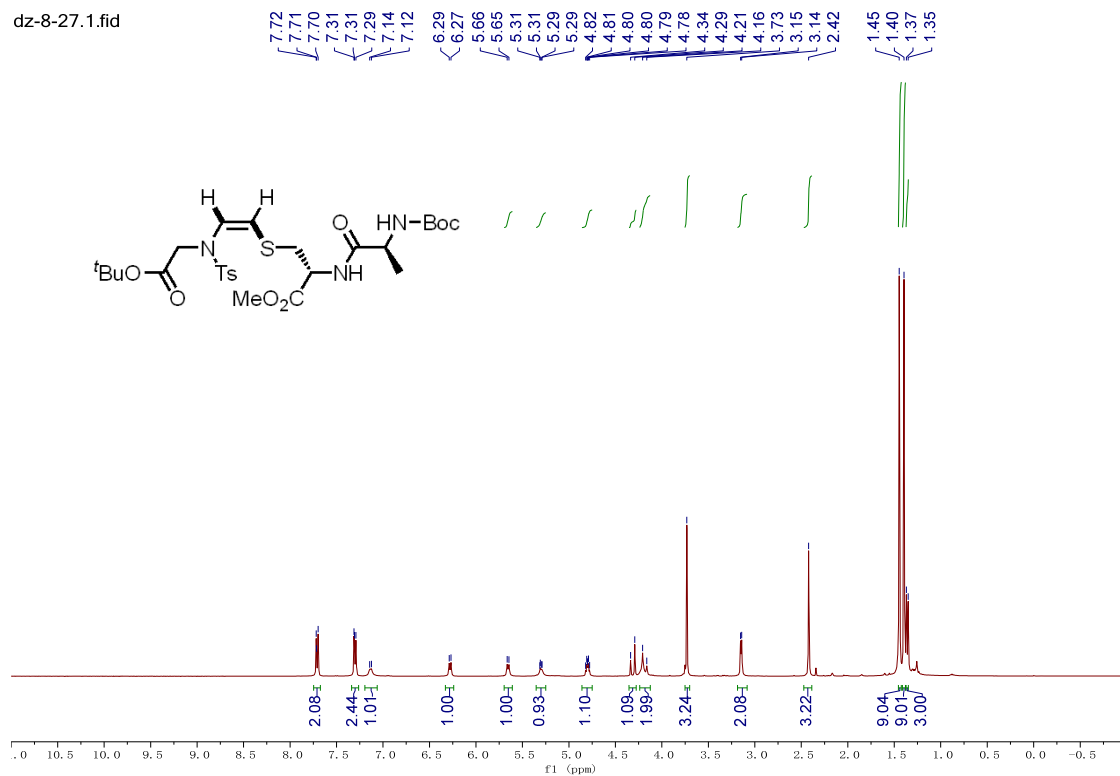

<sup>1</sup>H NMR of 9k

dz-8-27.2.fid

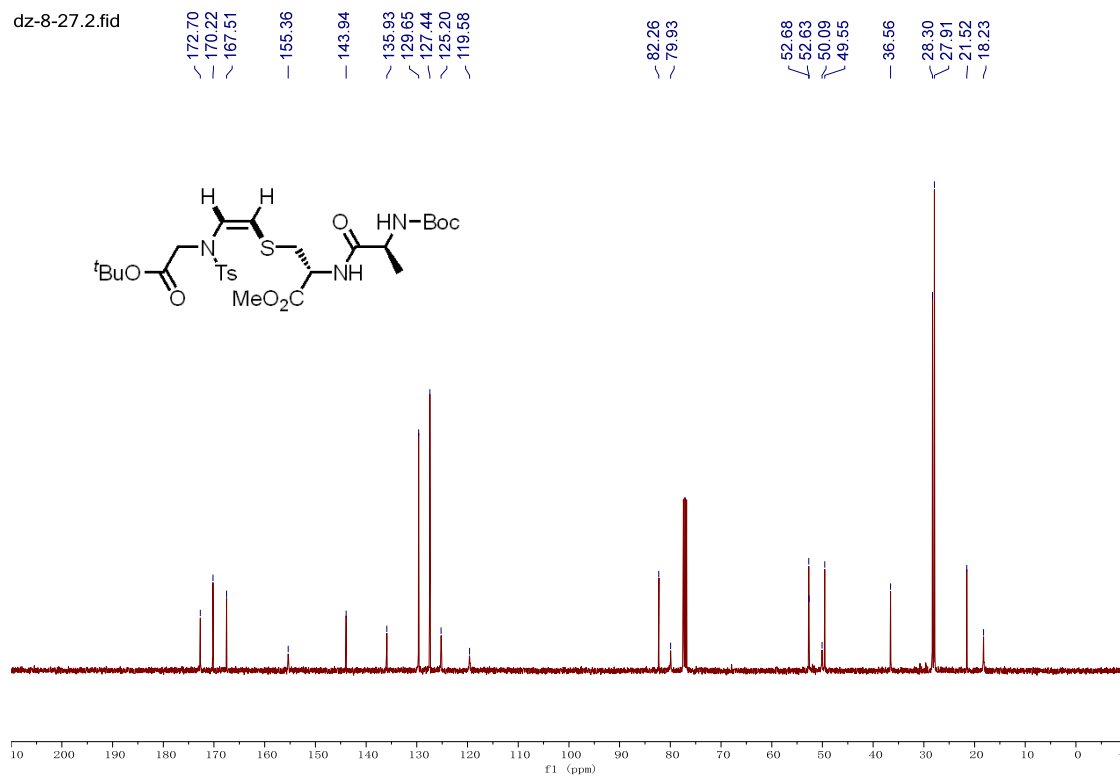

<sup>13</sup>C NMR of 9k



dz-8-30.1.fid

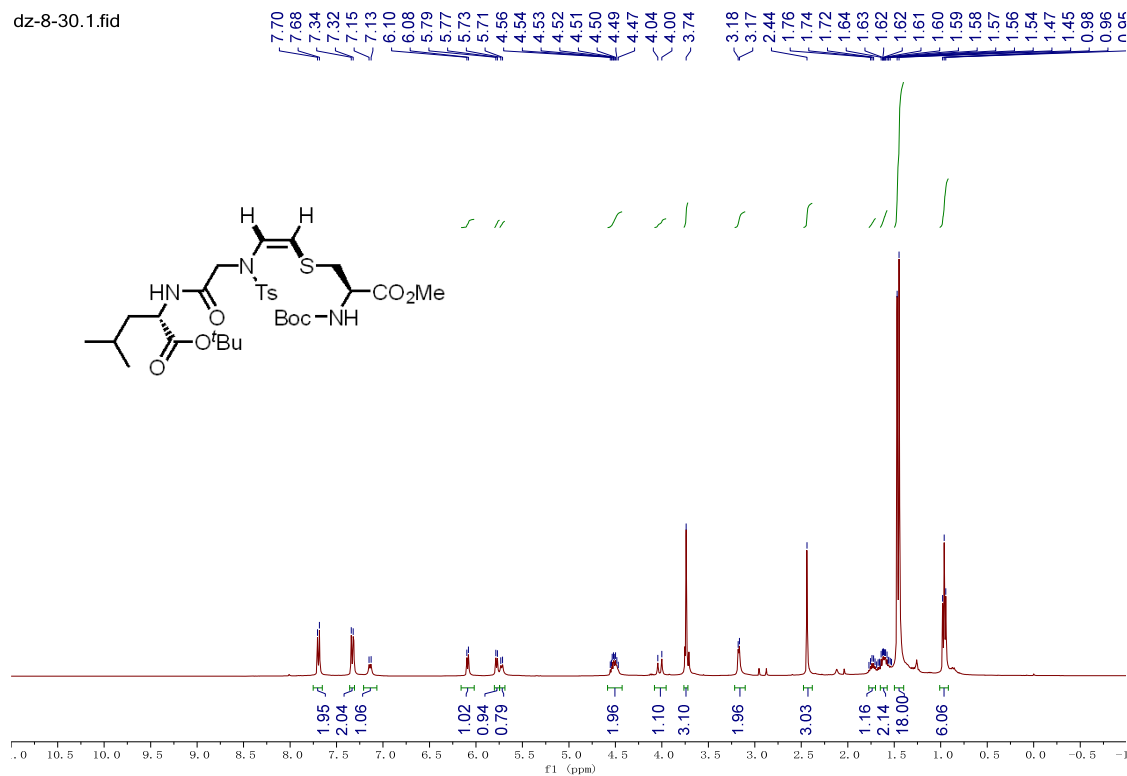

<sup>1</sup>H NMR of 91

dz-8-30.2.fid

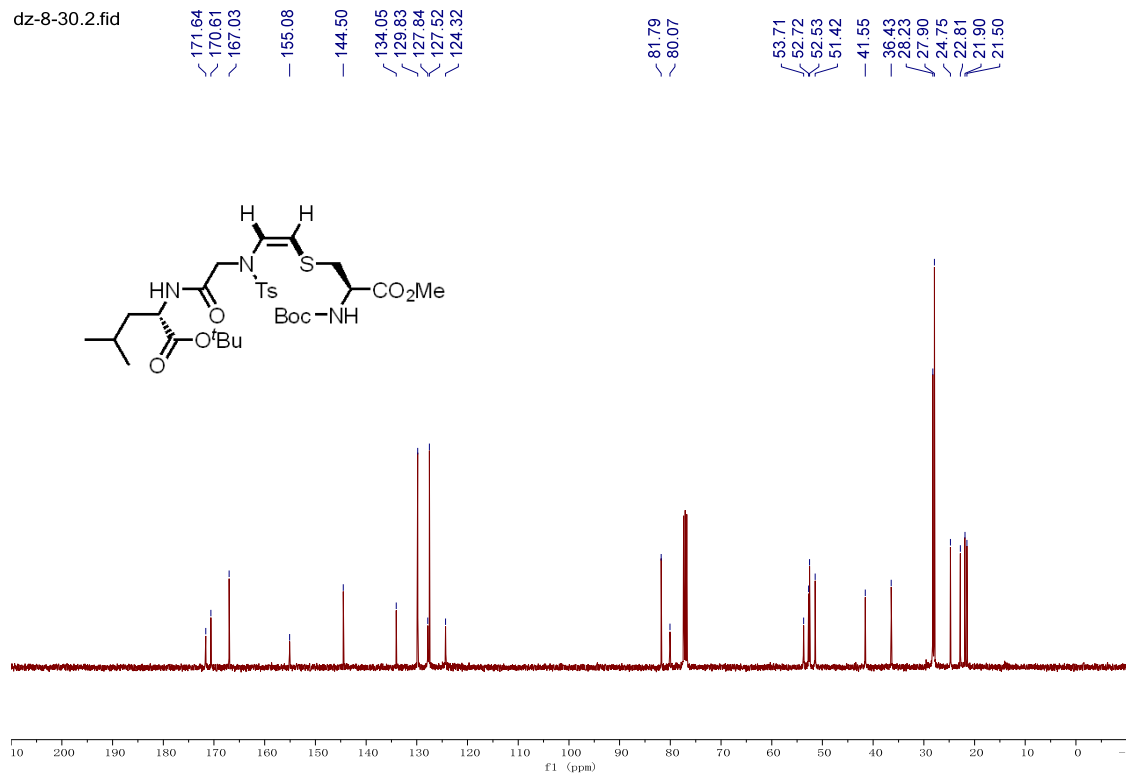

<sup>13</sup>C NMR of 91

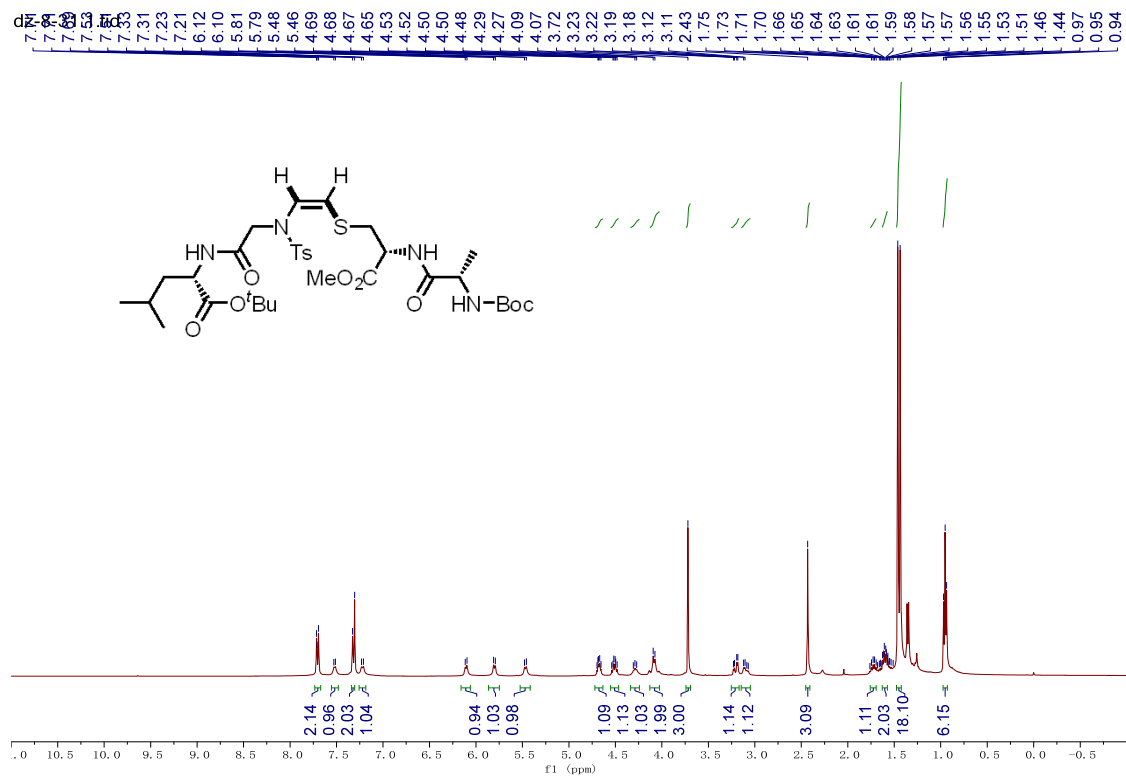

<sup>1</sup>H NMR of **9m**

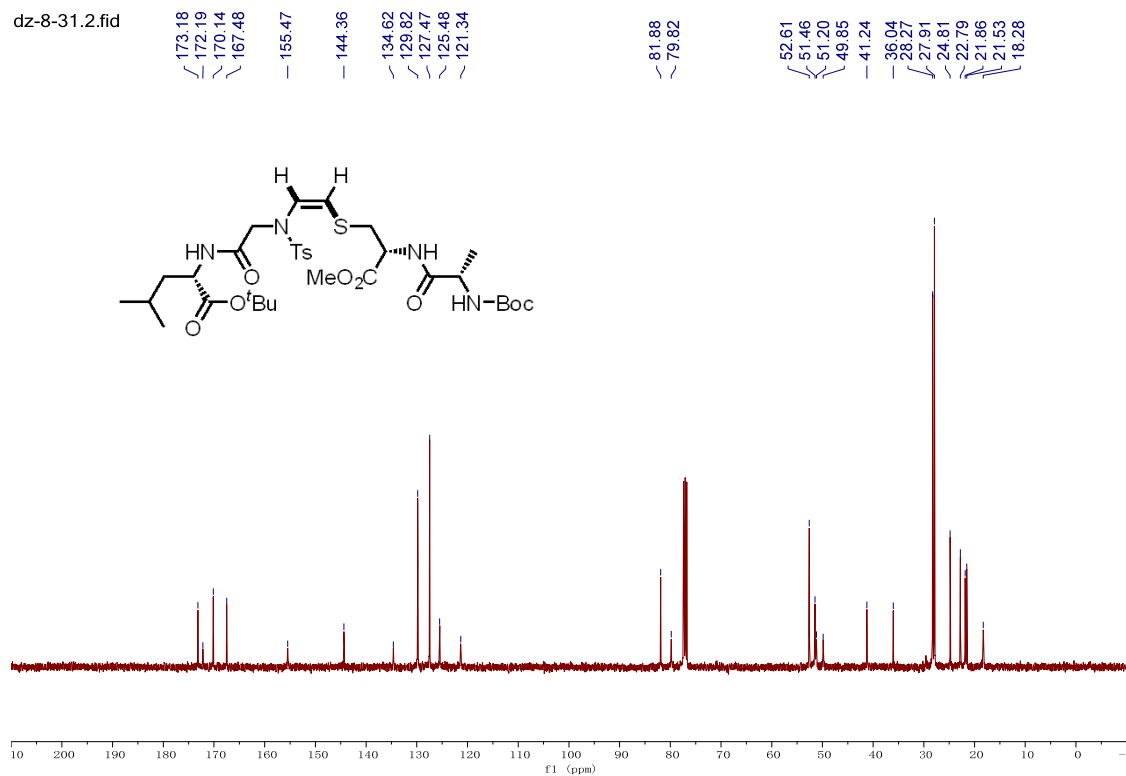

<sup>13</sup>C NMR of **9m**

dz-9-81.1.fid

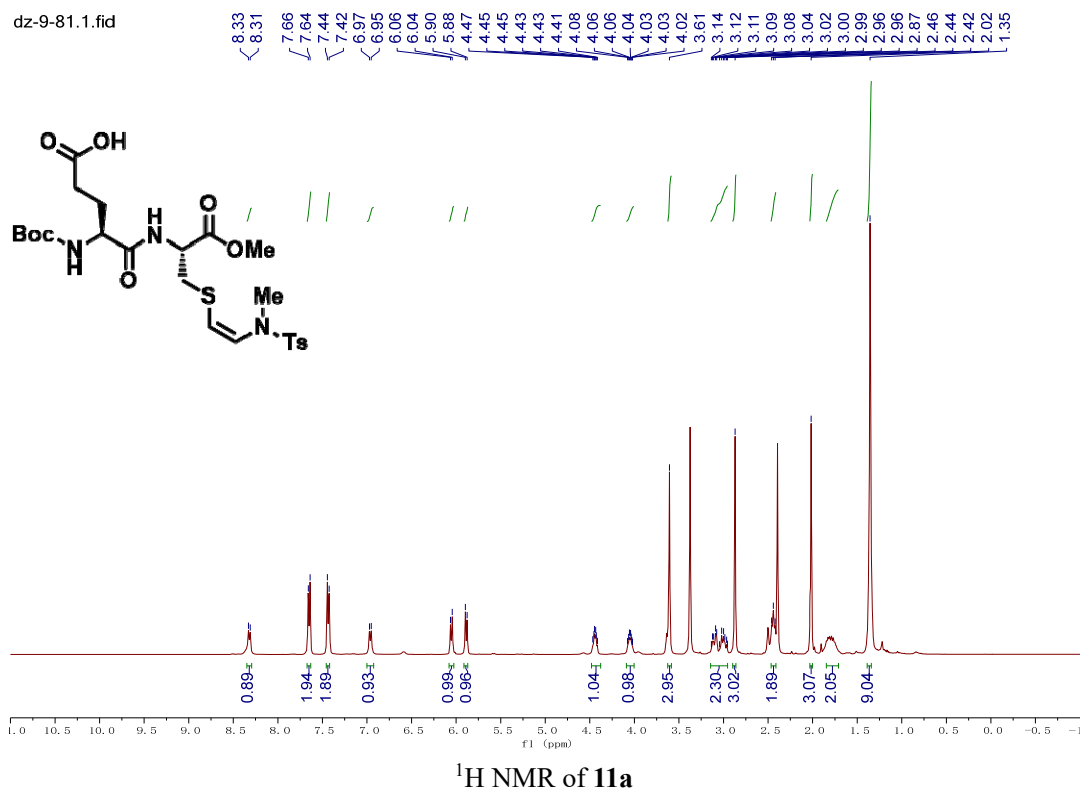

dz-9-81-c.1.fid

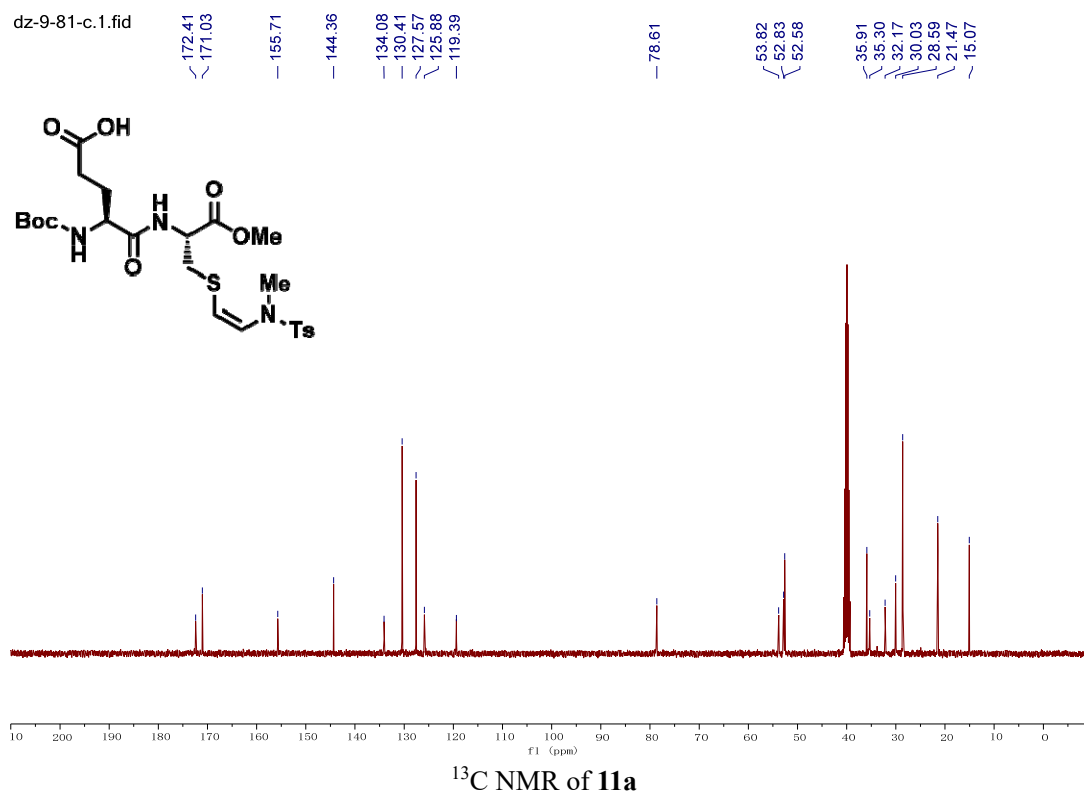

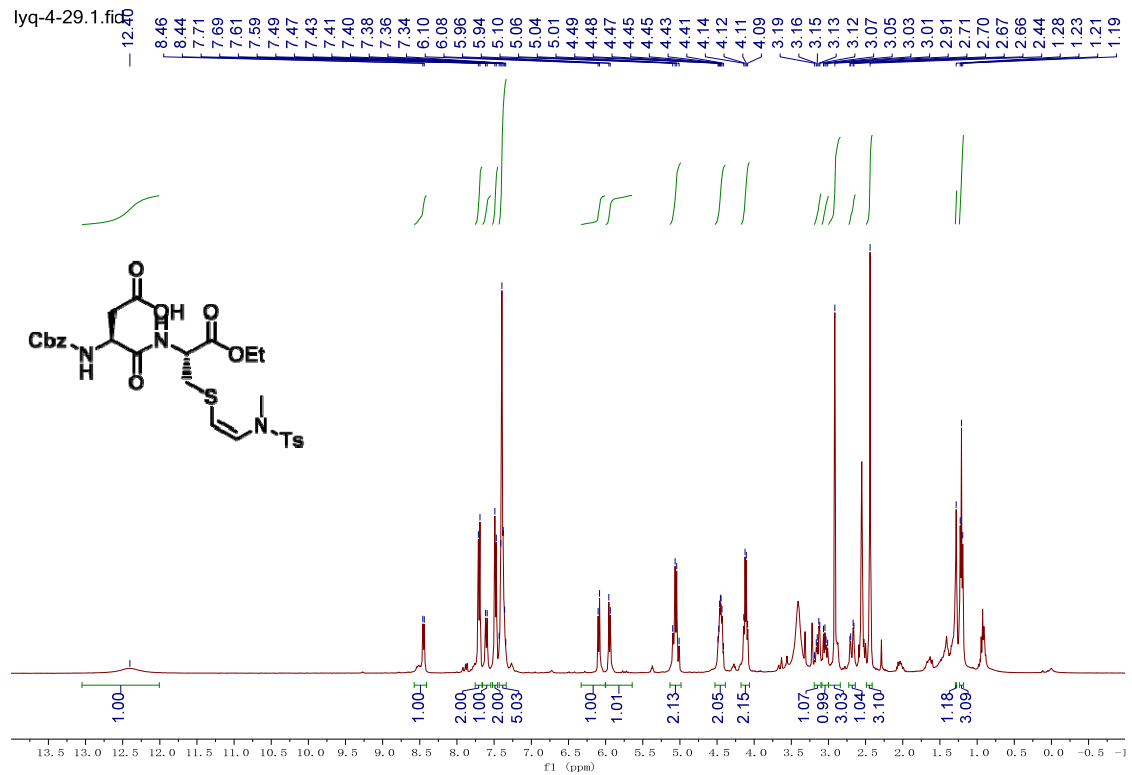

<sup>1</sup>H NMR of **11b**

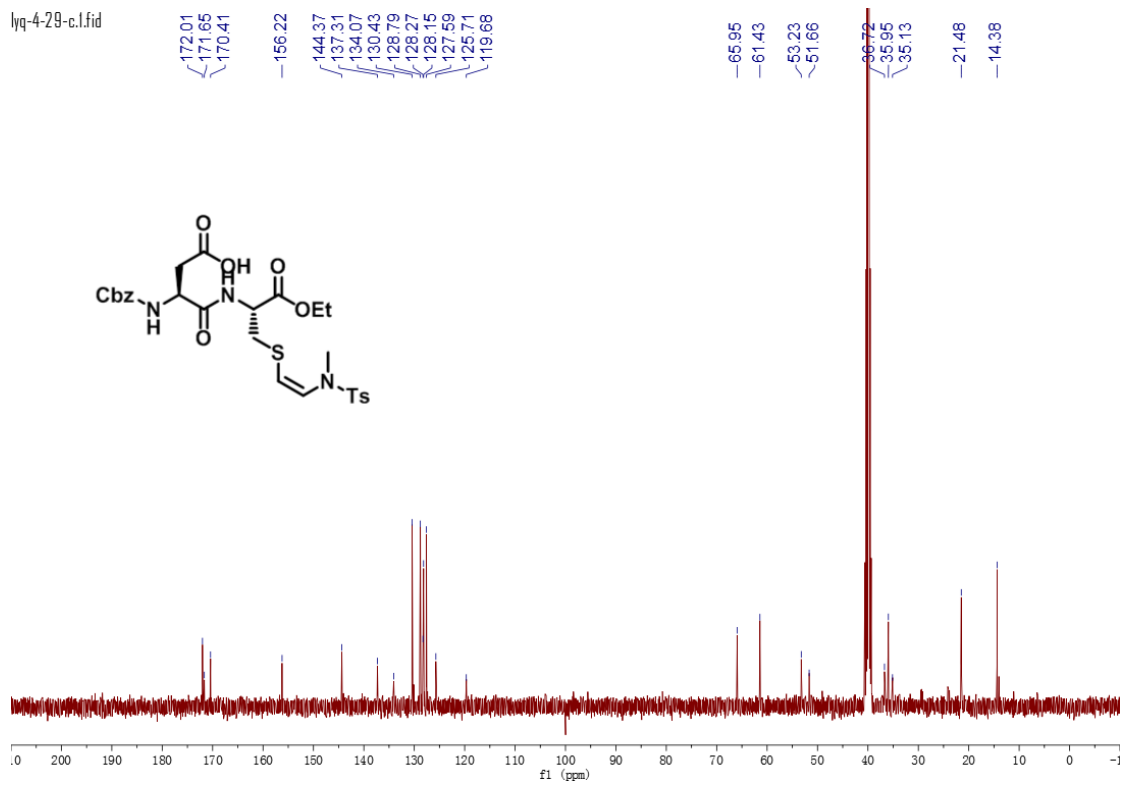

<sup>13</sup>C NMR of **11b**

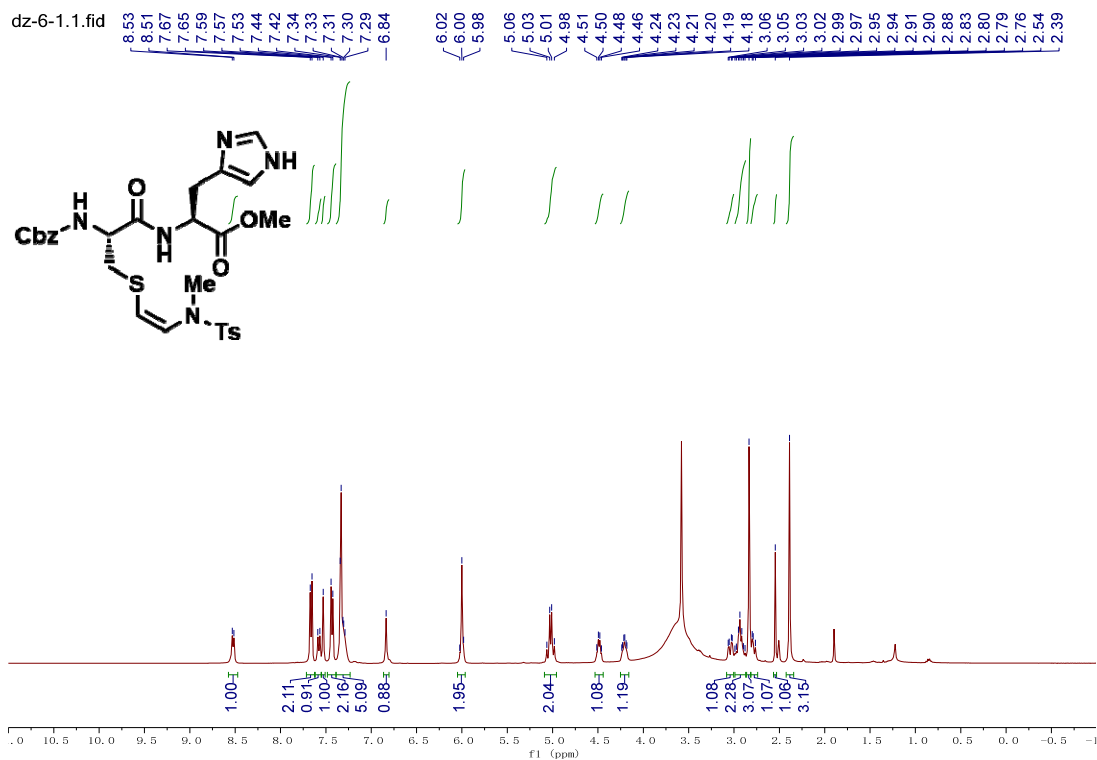

<sup>1</sup>H NMR of 11c

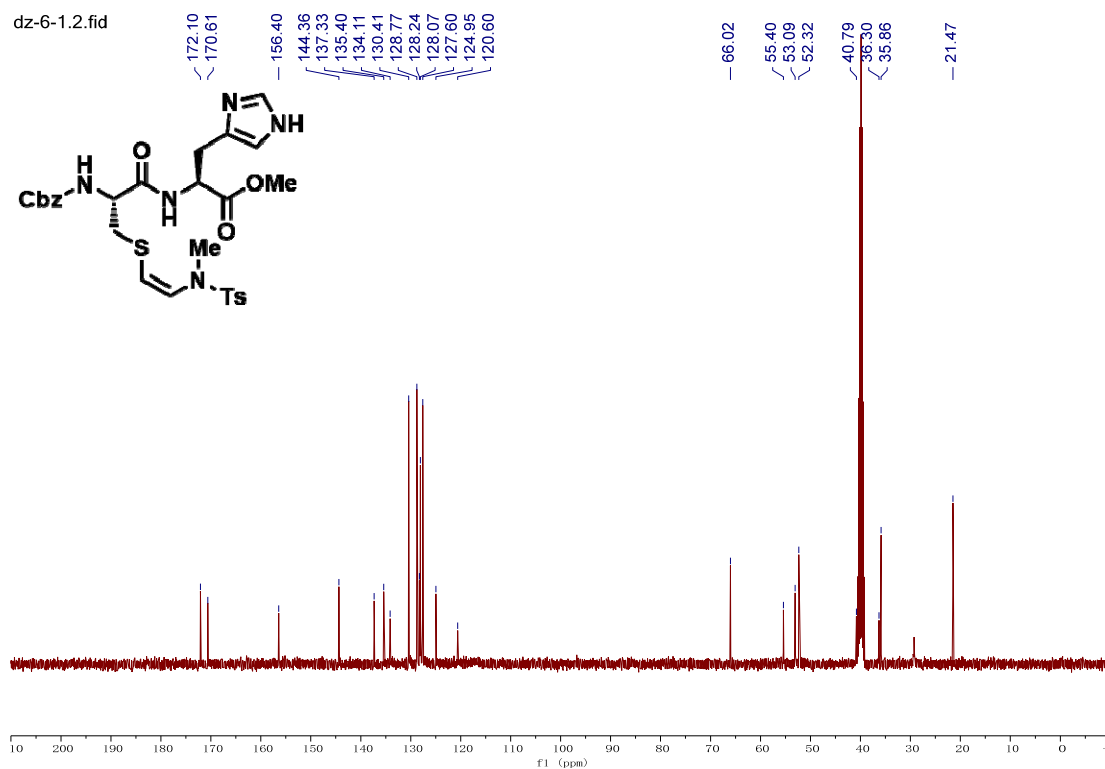

<sup>13</sup>C NMR of 11c

dz-6-44.1.fid

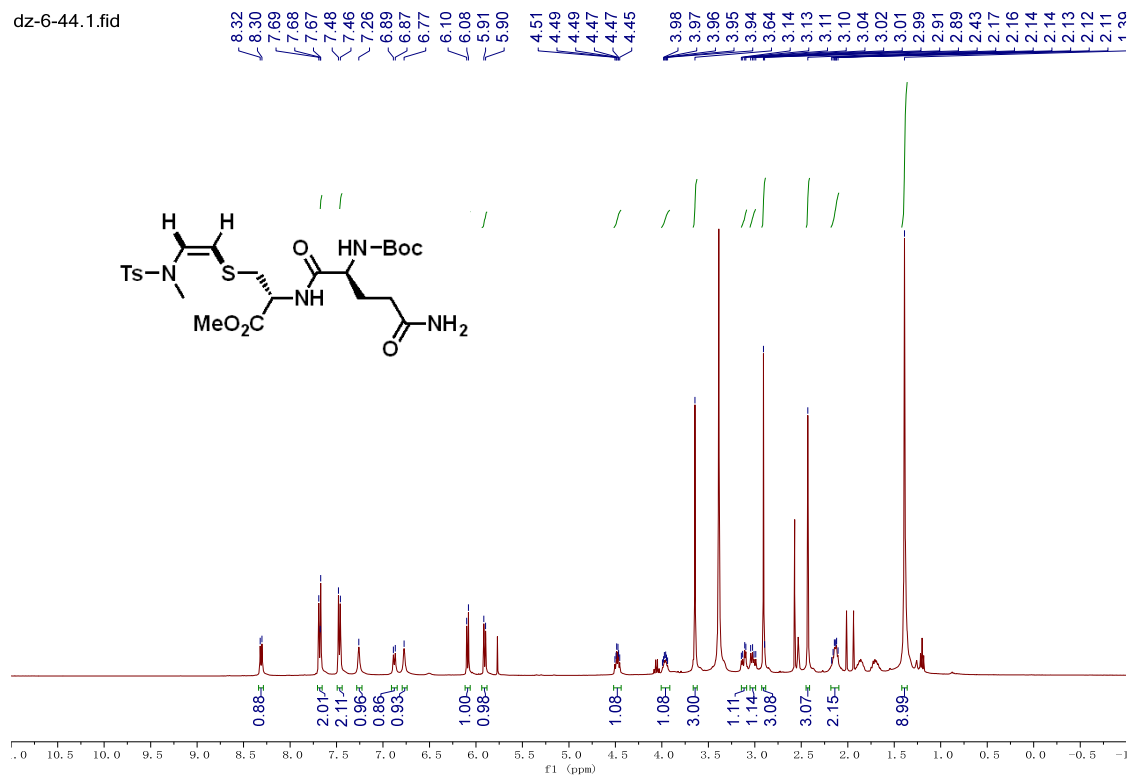

<sup>1</sup>H NMR of 11d

dz-6-44.2.fid

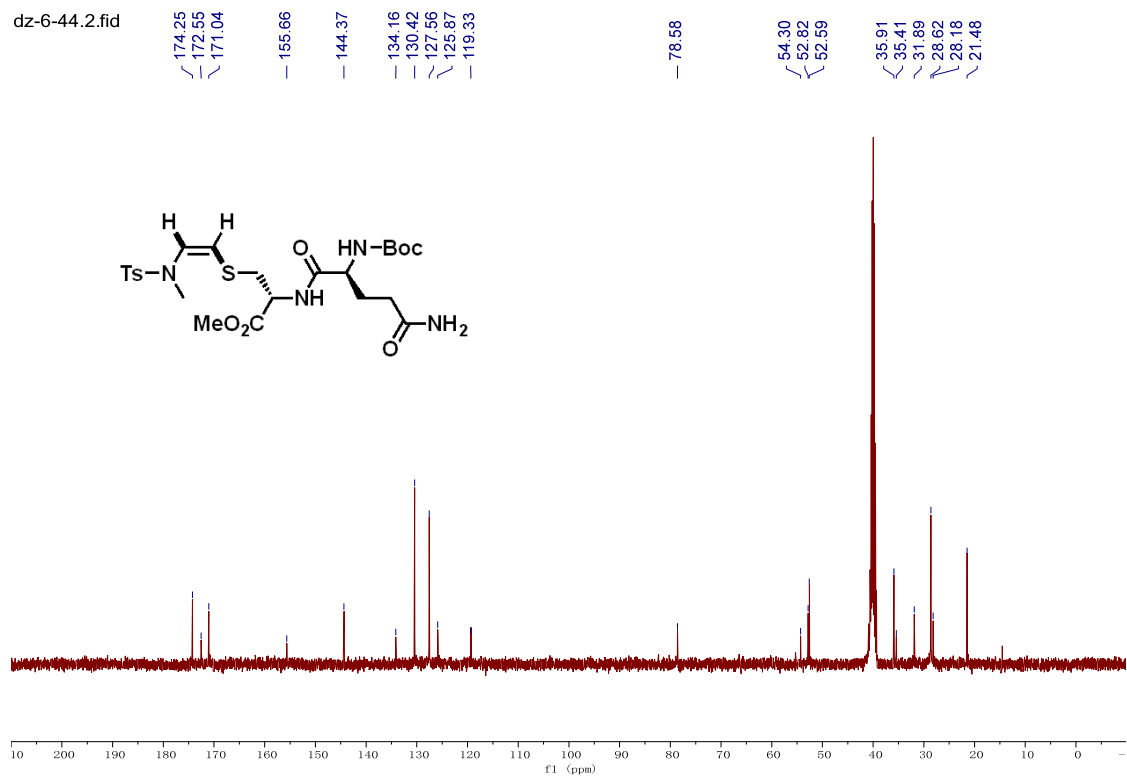

<sup>13</sup>C NMR of 11d

lyq-3-76-2.1.fid

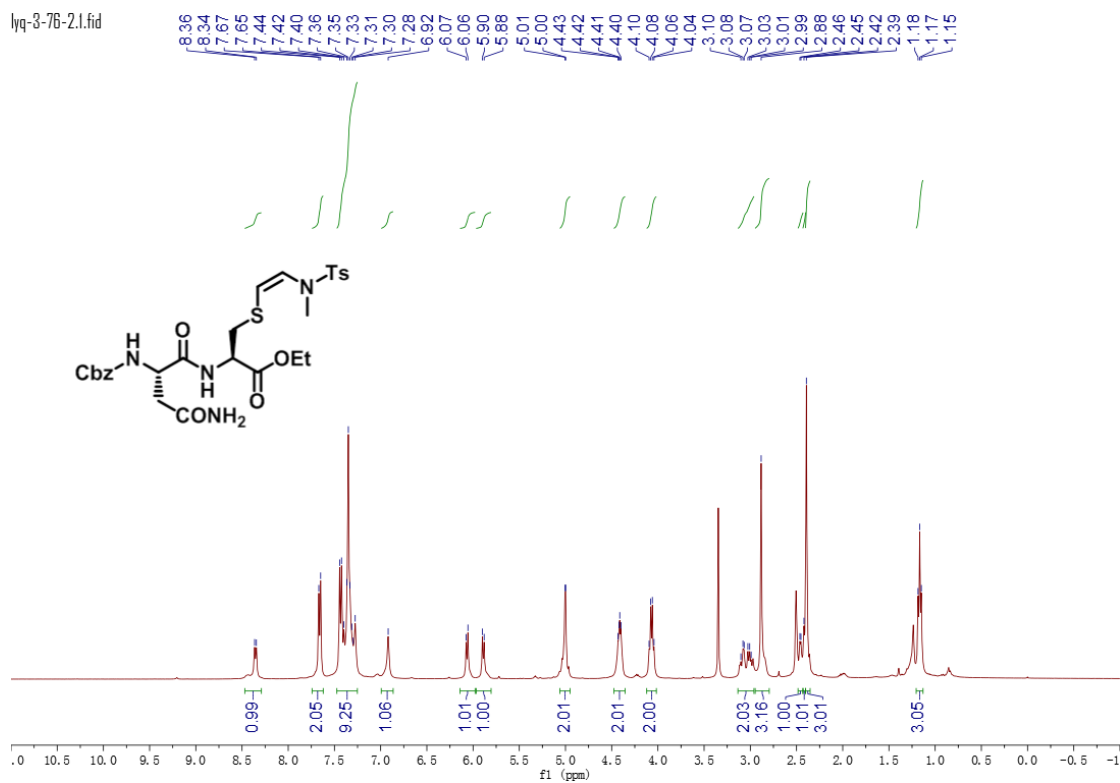

<sup>1</sup>H NMR of 11e

lyq-3-76-2.2.fid

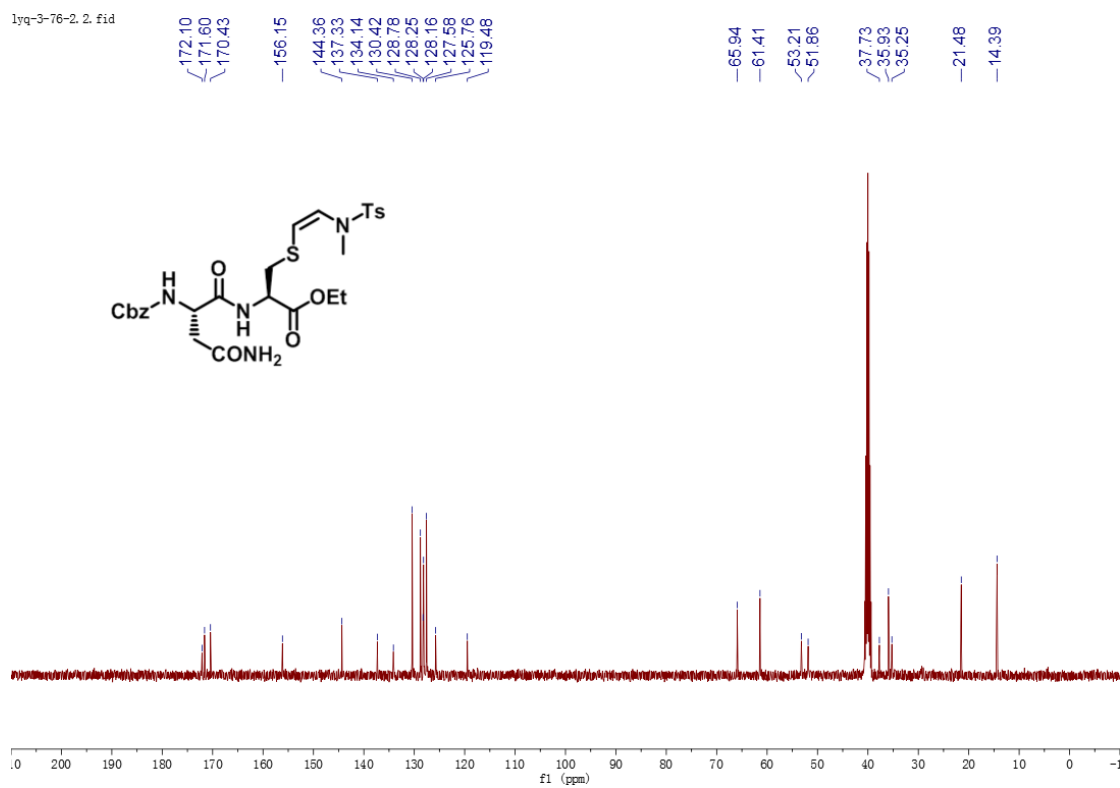

<sup>13</sup>C NMR of 11e

dz-5-81-1.1.fid

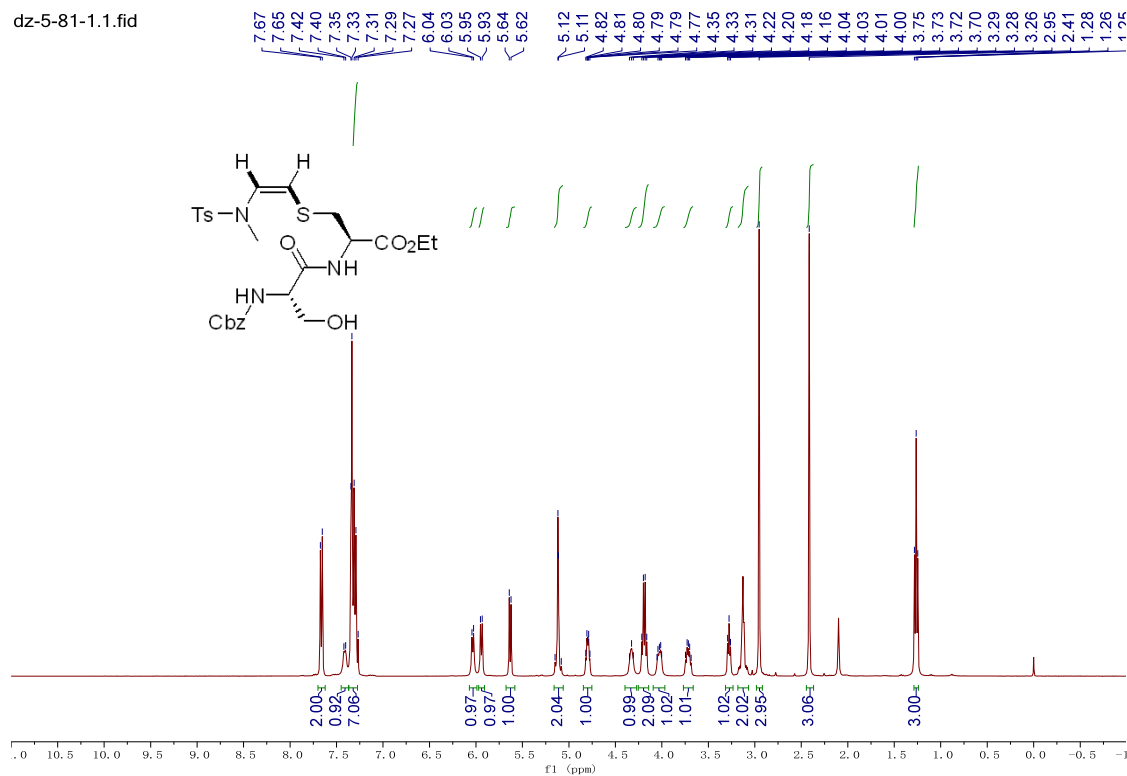

dz-5-81-1.2.fid

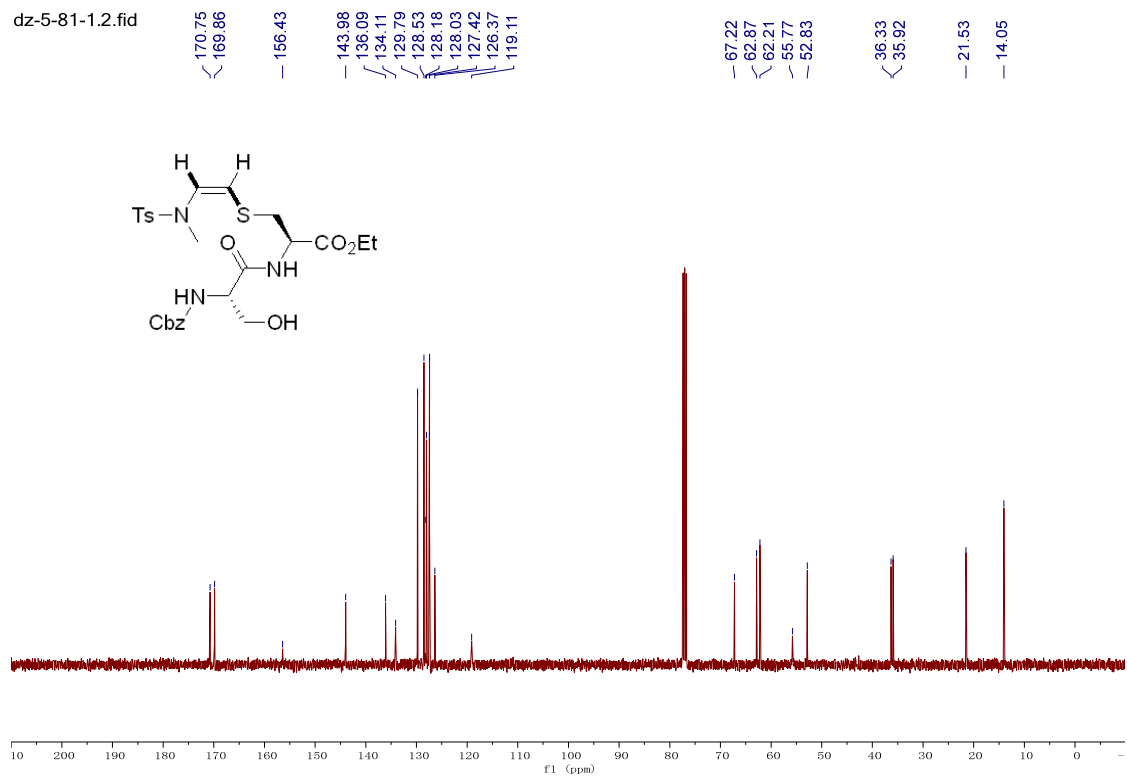



lyq-3-72.1.fid

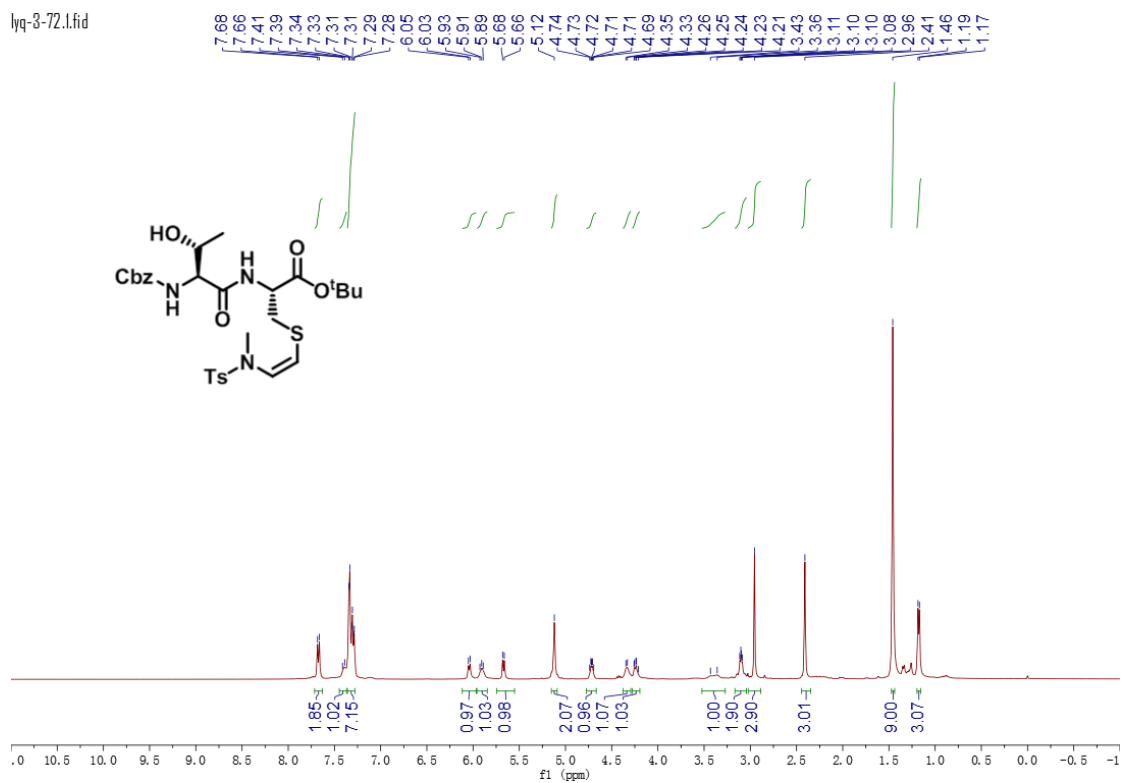

<sup>1</sup>H NMR of 11g

lyq-3-72.2.fid

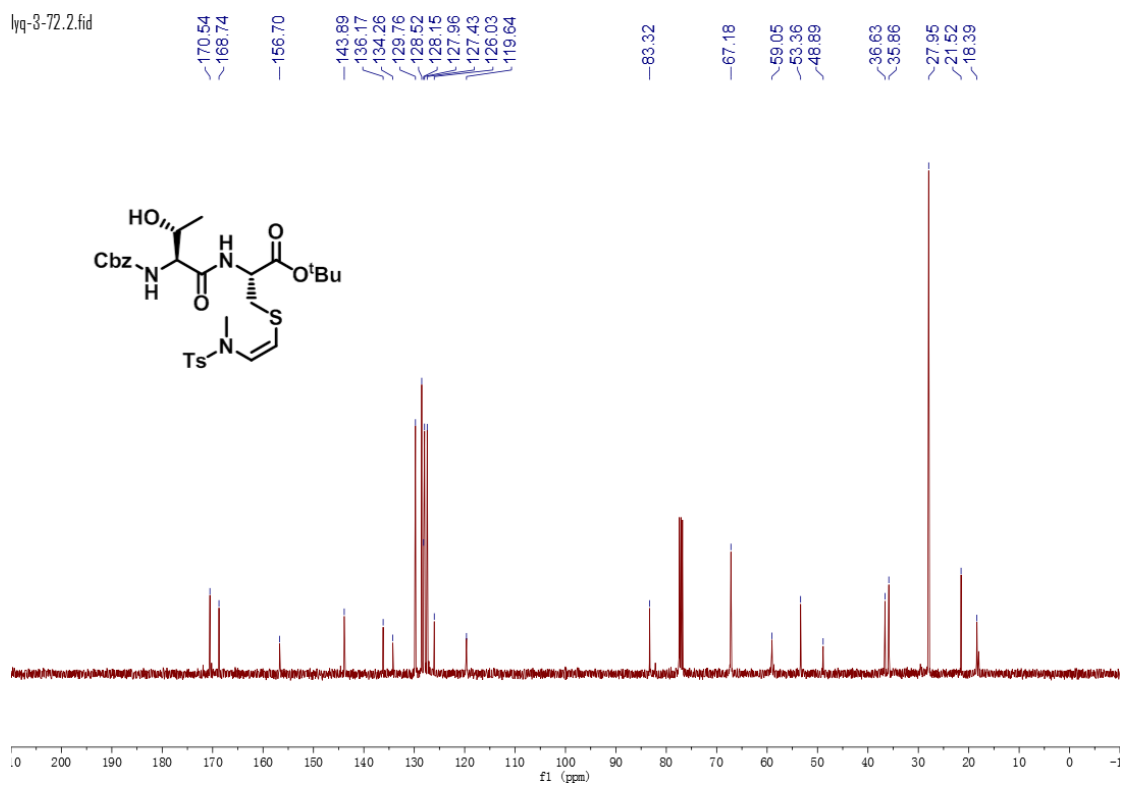

<sup>13</sup>C NMR of 11g

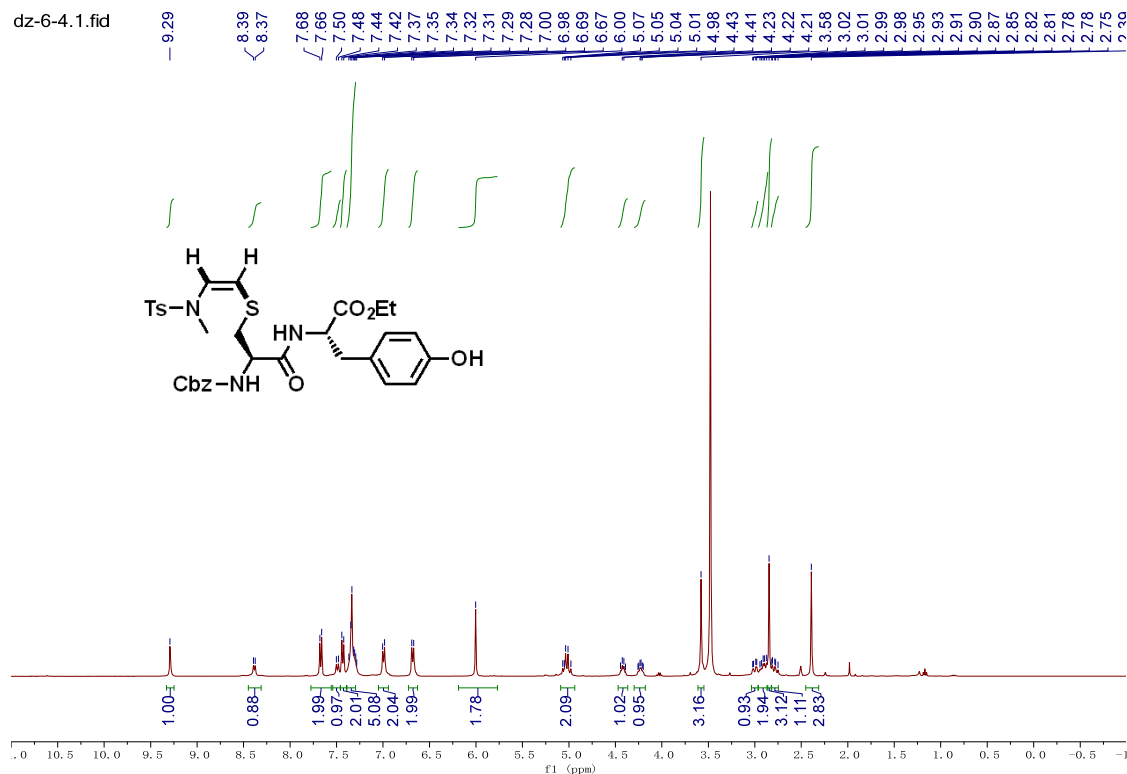

$^1\text{H}$  NMR of **11h**

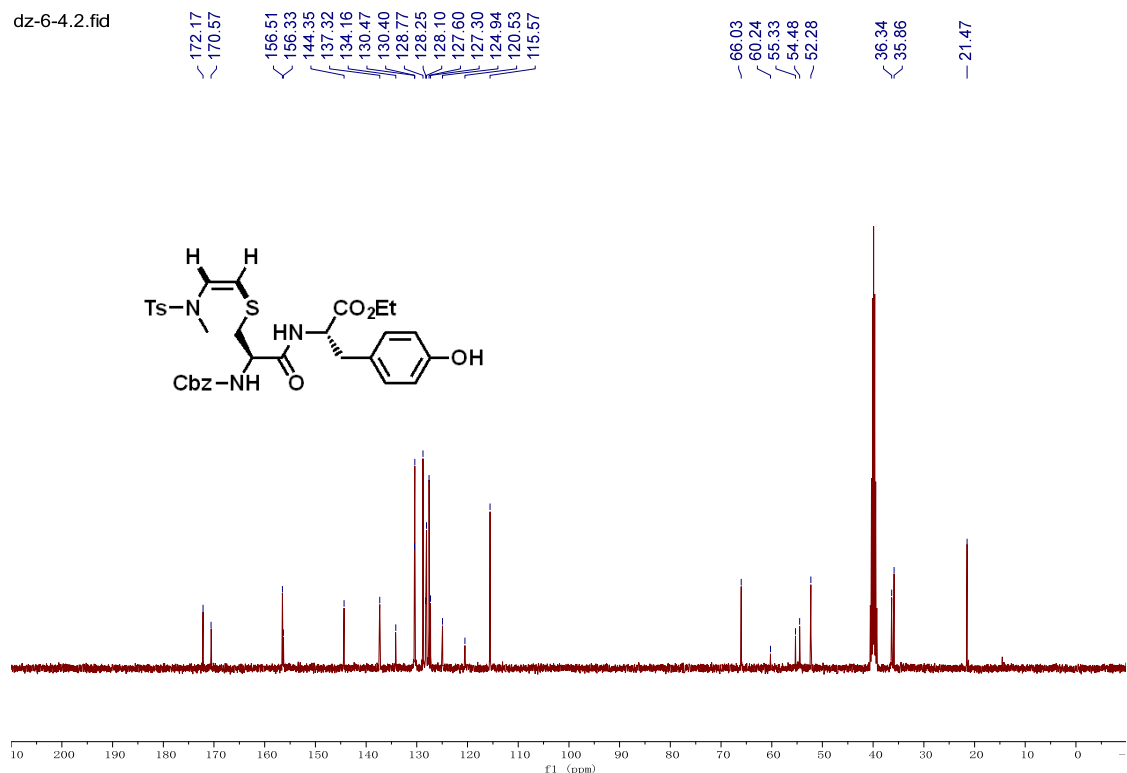

$^{13}\text{C}$  NMR of **11h**

dz-6-66.1.fid

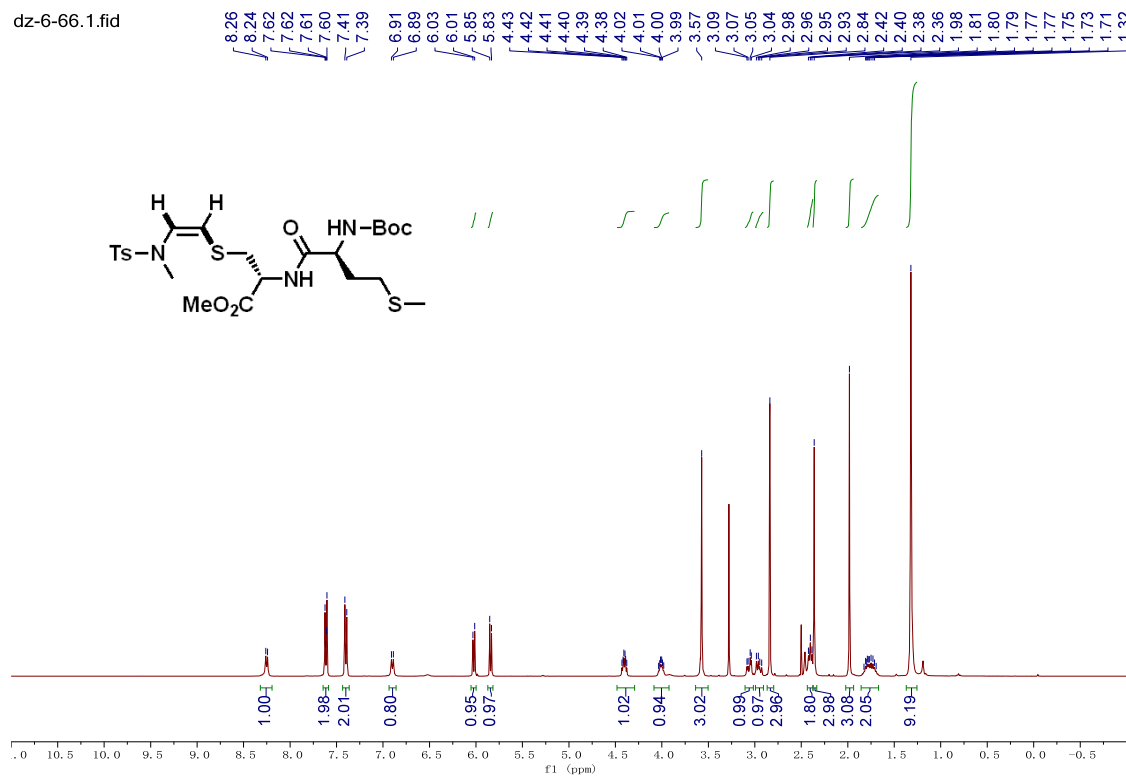

<sup>1</sup>H NMR of 11i

dz-6-66.2.fid

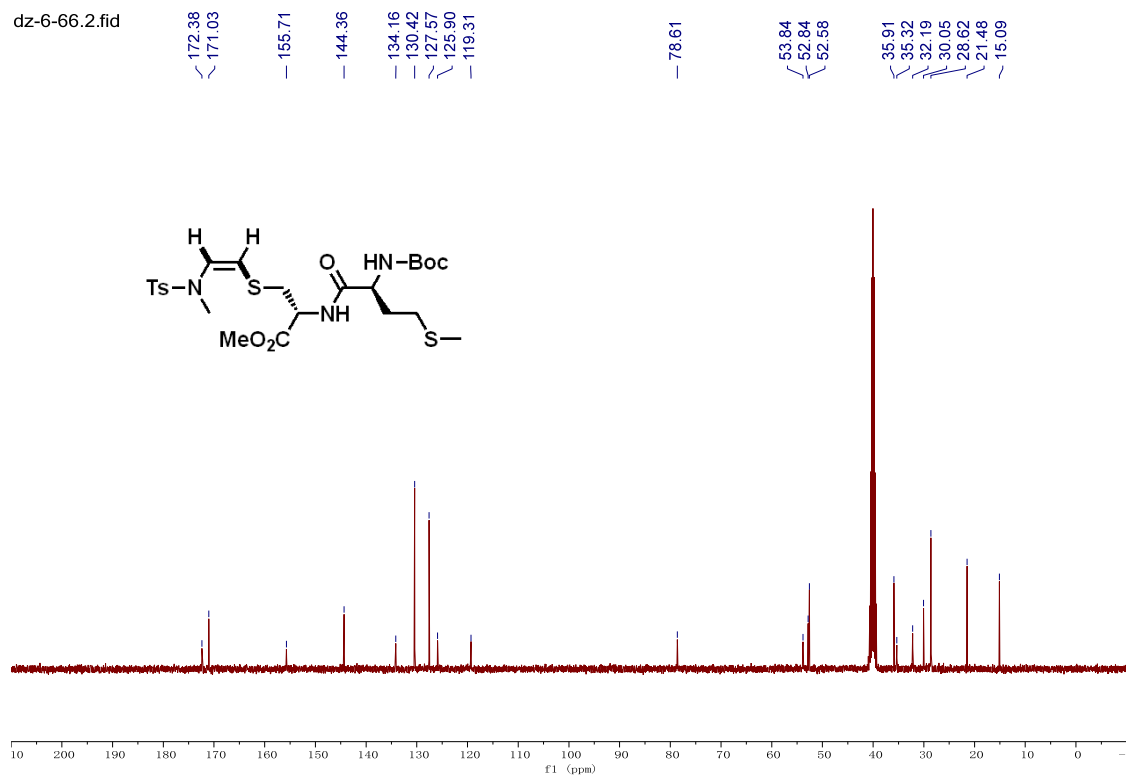

<sup>13</sup>C NMR of 11i

ZZJ-15-8  
single\_pulse

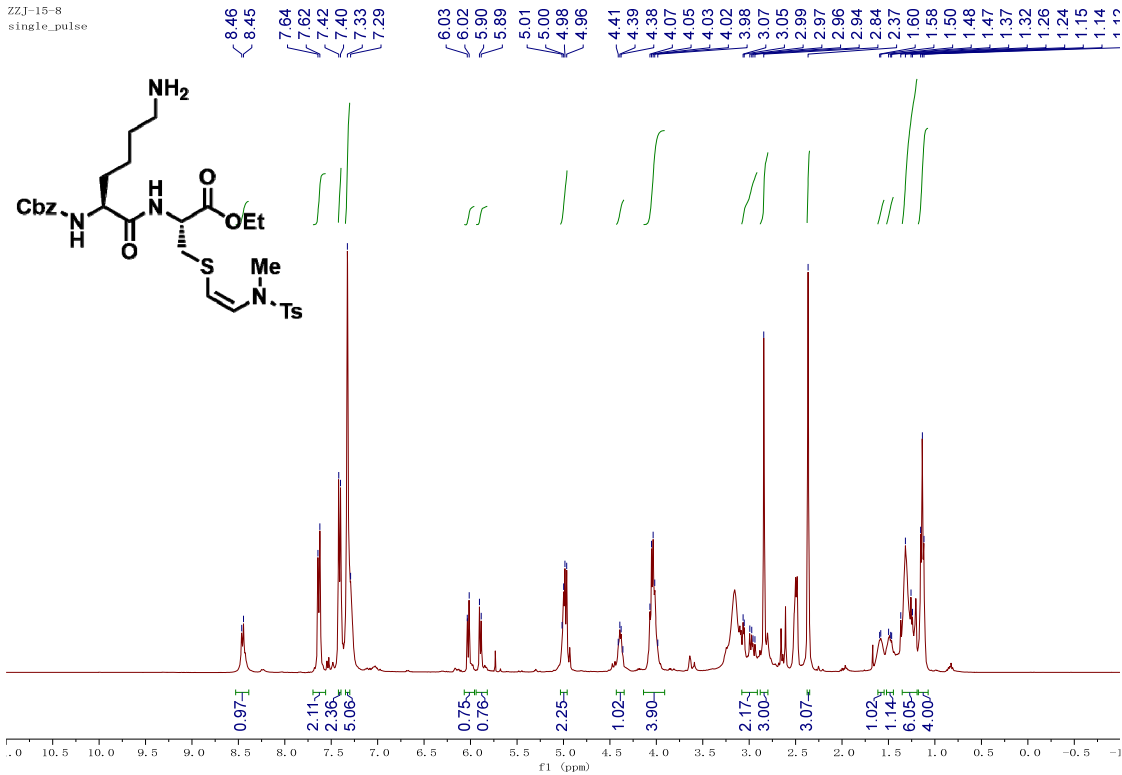

$^1\text{H NMR}$  of 11j

ZZJ-15-8  
single pulse decoupled gated

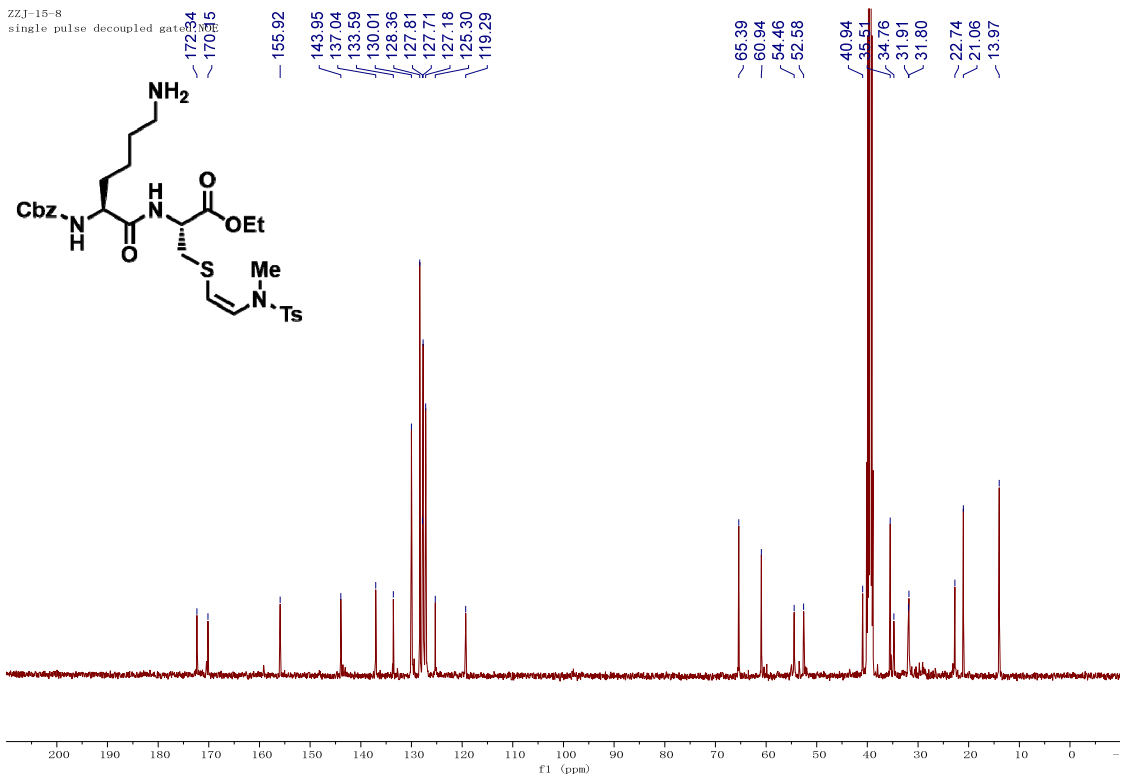

$^{13}\text{C NMR}$  of 11j

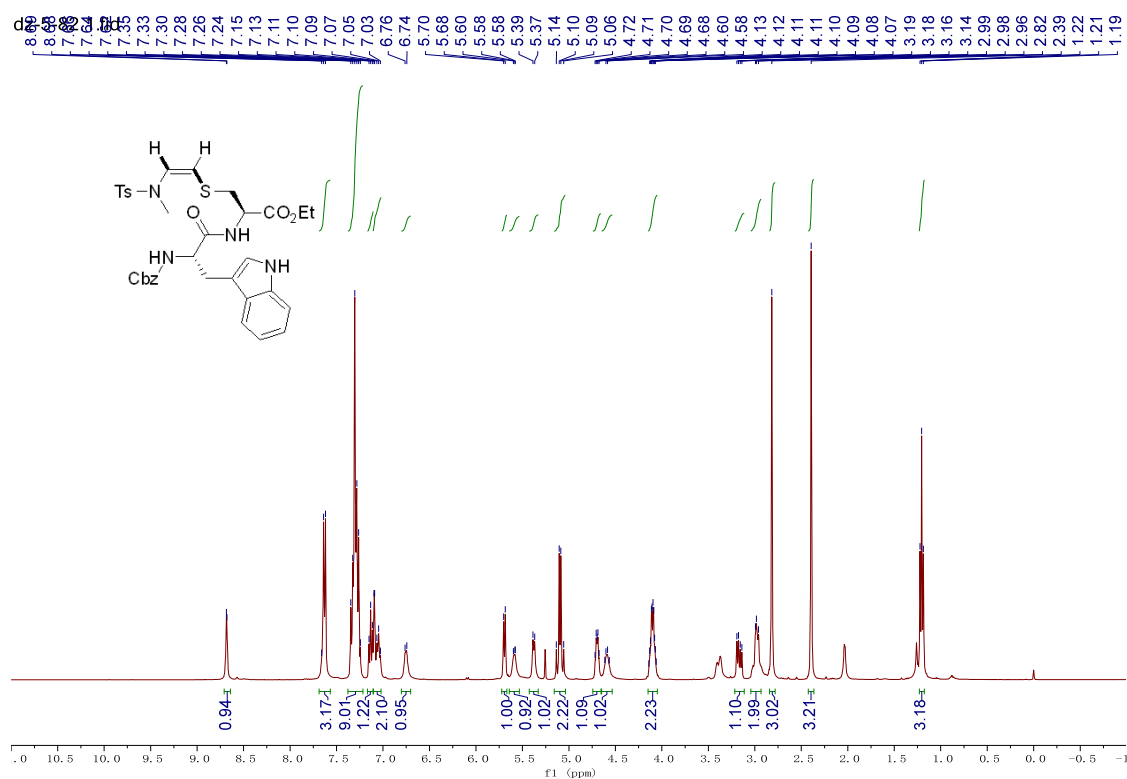

**<sup>1</sup>H NMR of 11k**

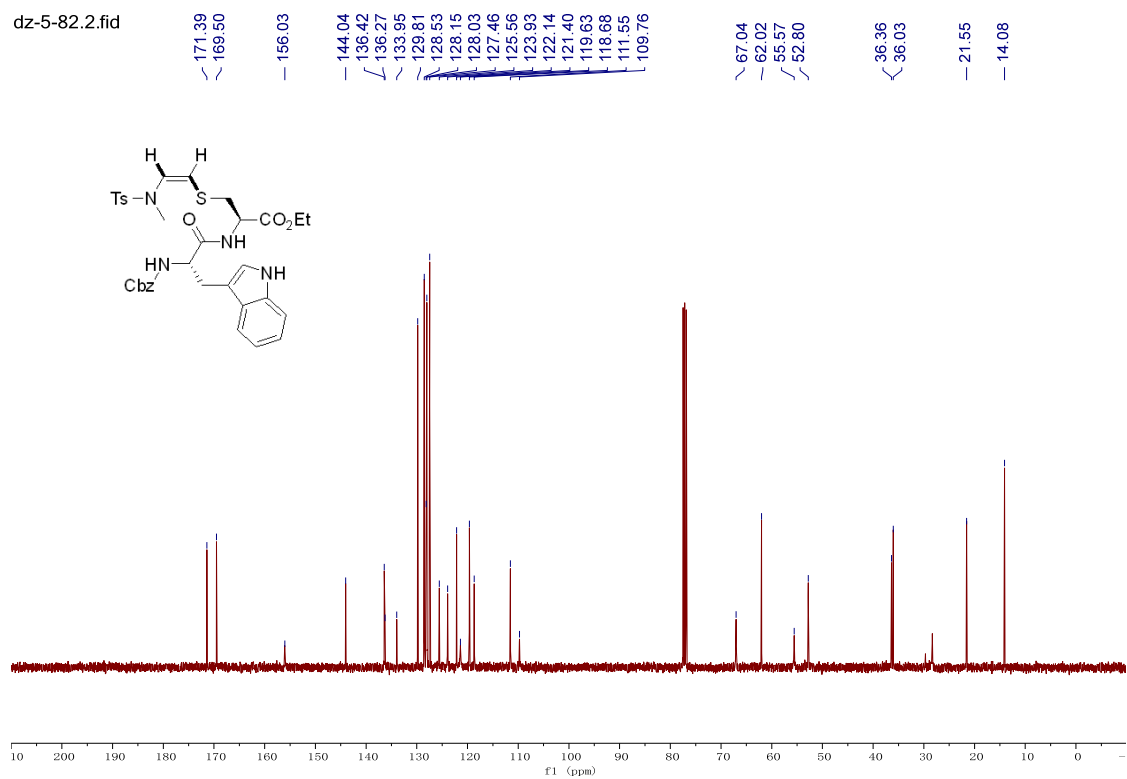

**<sup>13</sup>C NMR of 11k**

## 8. References:

1. S. J. Mansfield, C. D. Campbell, M. W. Jones and E. A. Anderson, A robust and modular synthesis of ynamides, *Chem. Commun.*, 2015, **51**, 3316.
2. B. Witulski and M. Gößmann, Stereospecific synthesis of chiral N-(ethynyl)allylglycines and their use in highly stereoselective intramolecular Pauson–Khand reactions, *Chem. Commun.*, 1999, DOI: 10.1039/A905898B, 1879.
3. T. Hamada, X. Ye and S. S. Stahl, Copper-Catalyzed Aerobic Oxidative Amidation of Terminal Alkynes: Efficient Synthesis of Ynamides, *J. Am. Chem. Soc.*, 2008, **130**, 833.
